# Supplementary material for: Theoretical study of the excitation of proflavine H-dimers in an aqueous solution: the effect of functionals and dispersion corrections
Source: Royal Society of Chemistry journal article supplement (doi:10.1039/d3cp00882g), 2023-01-01
Supplement: d3cp00882g1.pdf [file d3cp00882g1.pdf]

Theoretical study of the excitation of proflavine H-dimer in an aqueous solution: the effect of functionals and dispersion corrections

Evgeniy S. Savenko and Victor V. Kostjukov

SUPPLEMENTARY MATERIAL

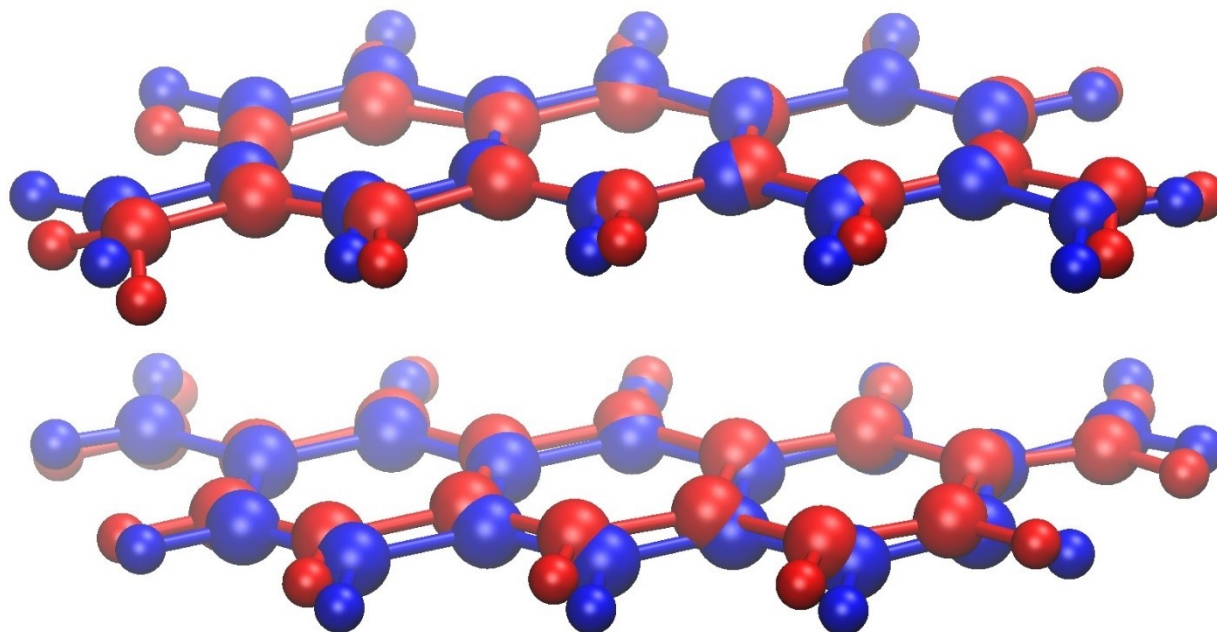

Fig. S1. Fitted structures of the proflavine dimer in the ground (blue) and excited (red) states, calculated using the APFD functional

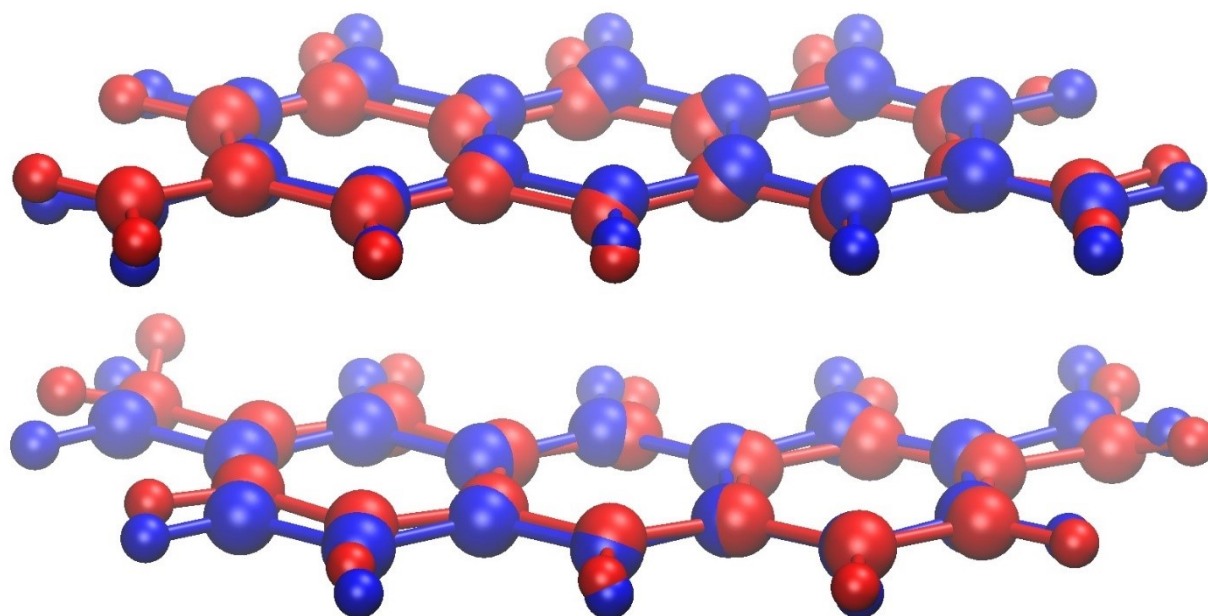

Fig. S2. Fitted structures of the proflavine dimer in the ground (blue) and excited (red) states, calculated using the B3LYP functional with GD2 correction

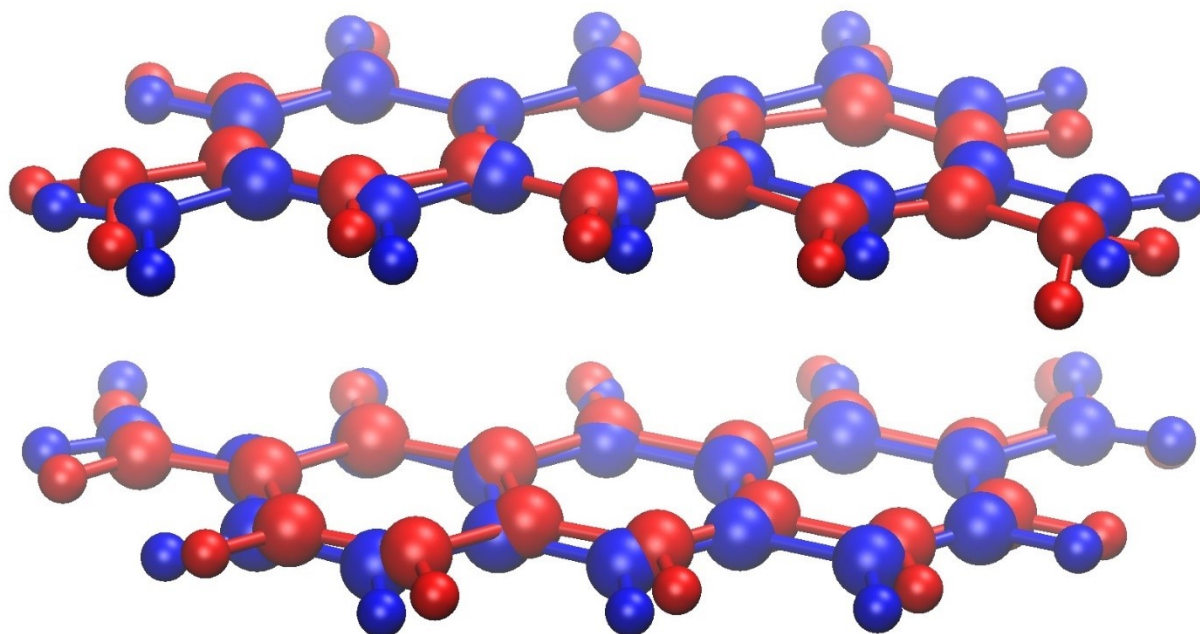

Fig. S3. Fitted structures of the proflavine dimer in the ground (blue) and excited (red) states, calculated using the B3LYP functional with GD3 correction

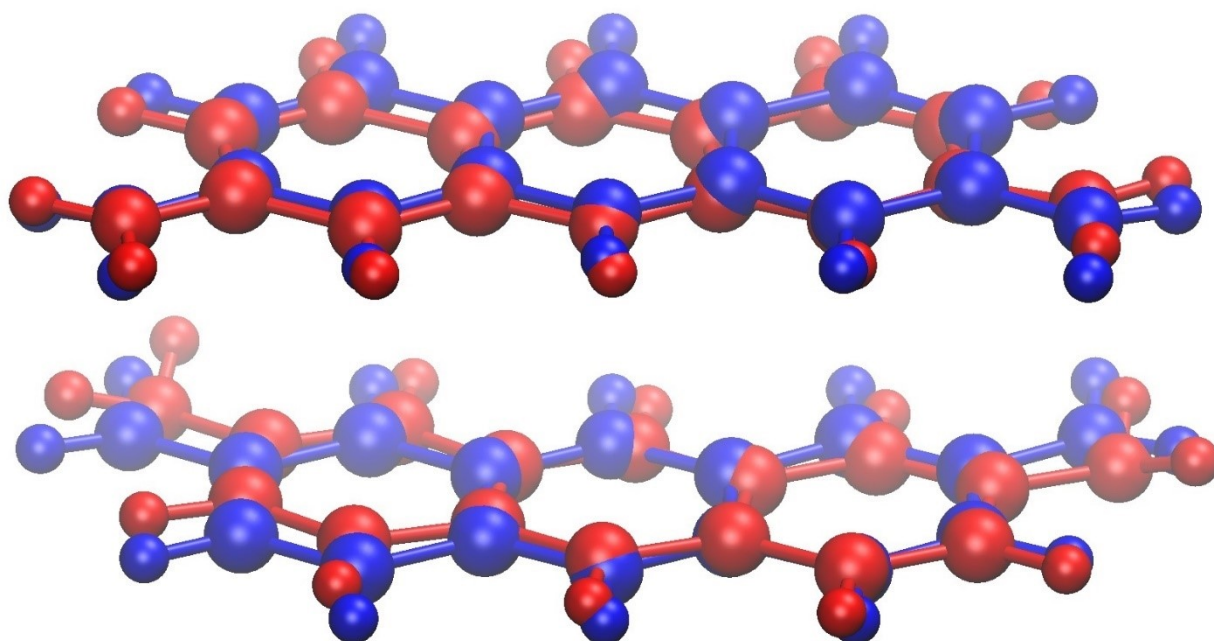

Fig. S4. Fitted structures of the proflavine dimer in the ground (blue) and excited (red) states, calculated using the B3LYP functional with GD3+BJ correction

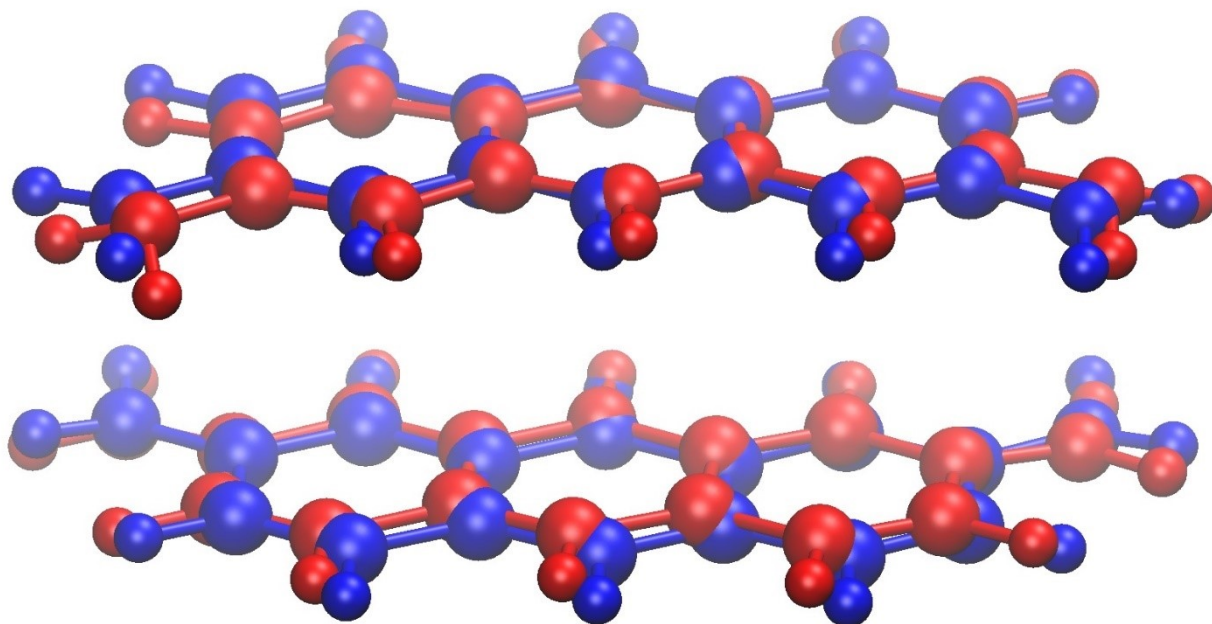

Fig. S5. Fitted structures of the proflavine dimer in the ground (blue) and excited (red) states, calculated using the B3PW91 functional with GD3 correction

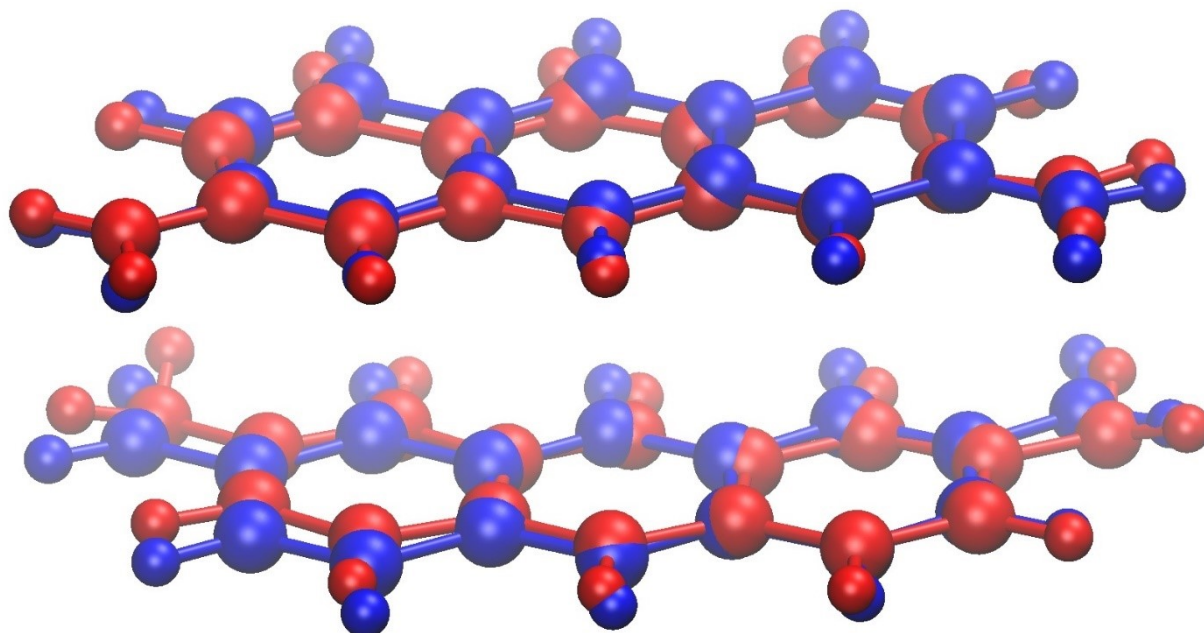

Fig. S6. Fitted structures of the proflavine dimer in the ground (blue) and excited (red) states, calculated using the B3PW91 functional with GD3+BJ correction



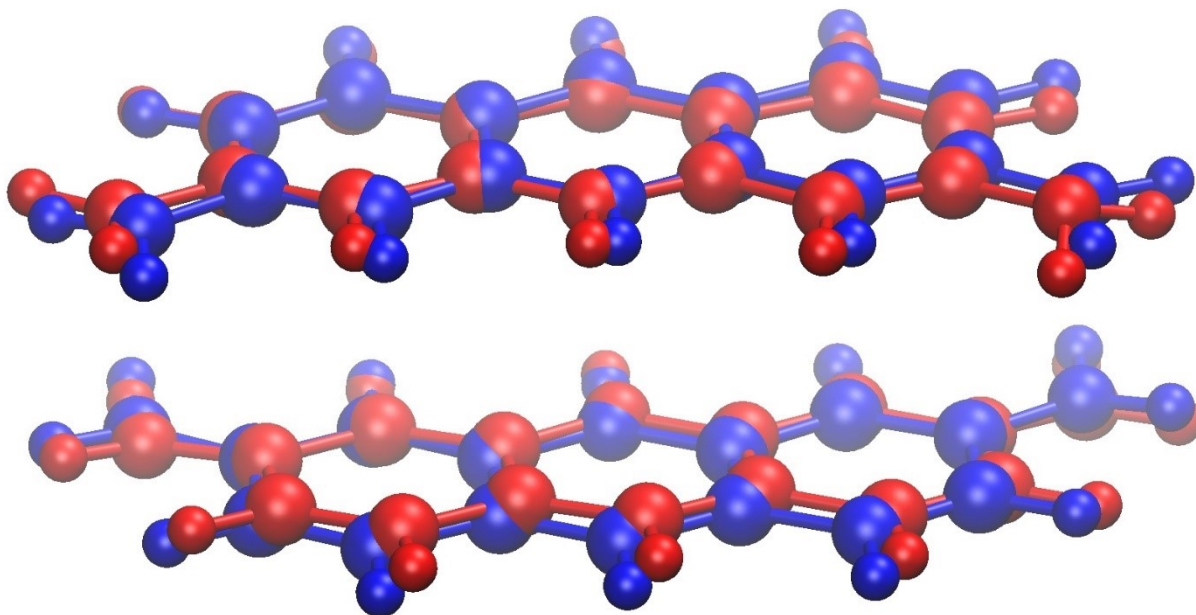

Fig. S7. Fitted structures of the proflavine dimer in the ground (blue) and excited (red) states, calculated using the BMK functional with GD3 correction

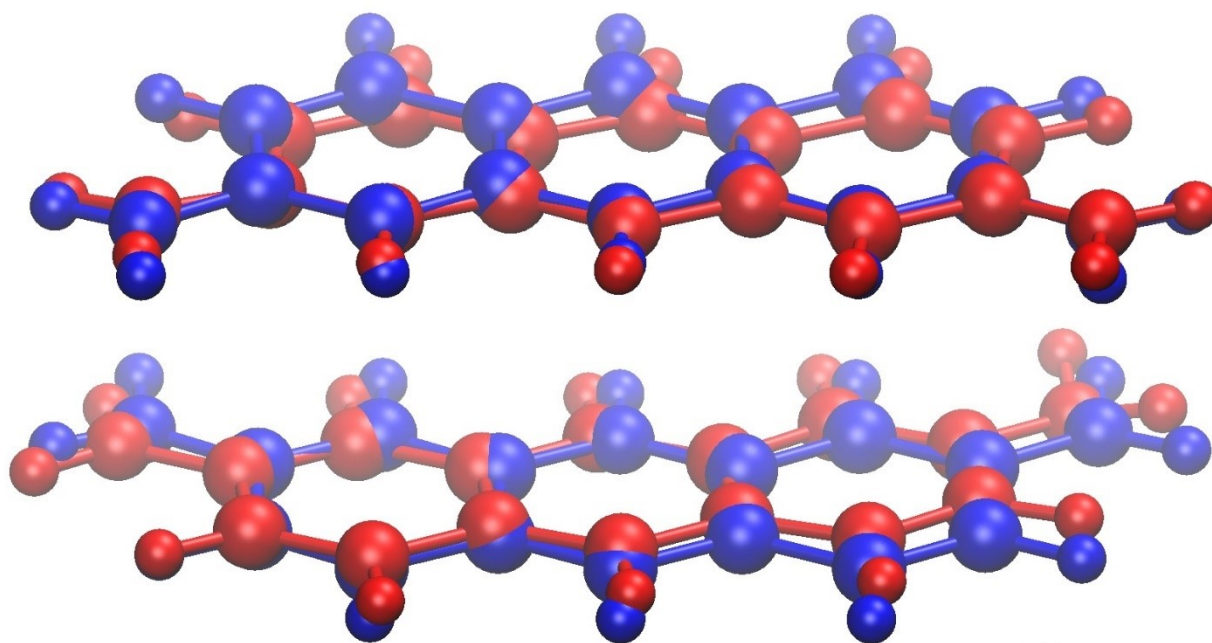

Fig. S8. Fitted structures of the proflavine dimer in the ground (blue) and excited (red) states, calculated using the BMK functional with GD3+BJ correction



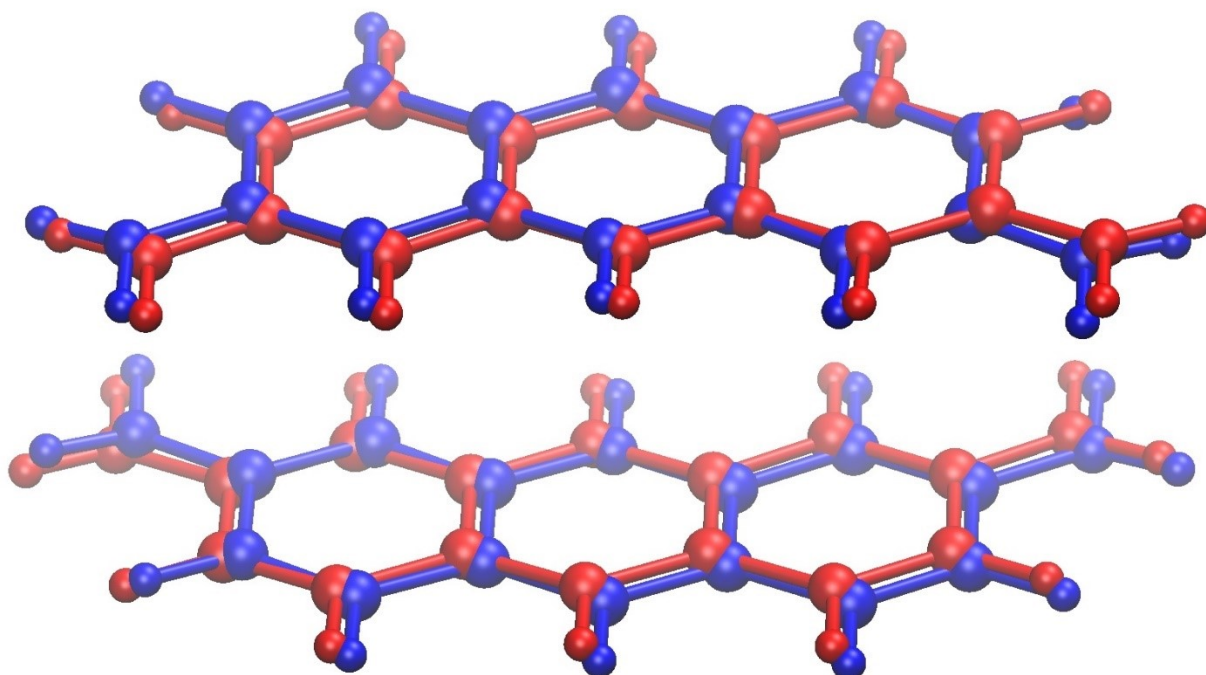

Fig. S9. Fitted structures of the proflavine dimer in the ground (blue) and excited (red) states, calculated using the CAM-B3LYP functional with GD3 correction

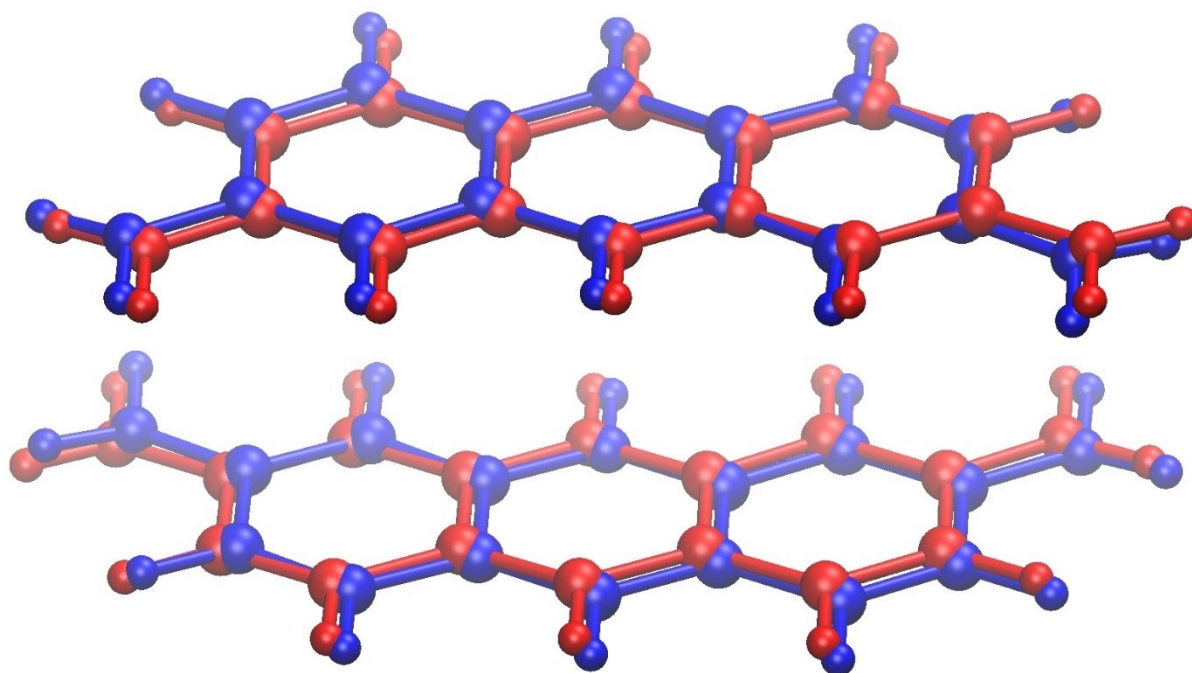

Fig. S10. Fitted structures of the proflavine dimer in the ground (blue) and excited (red) states, calculated using the CAM-B3LYP functional with GD3+BJ correction

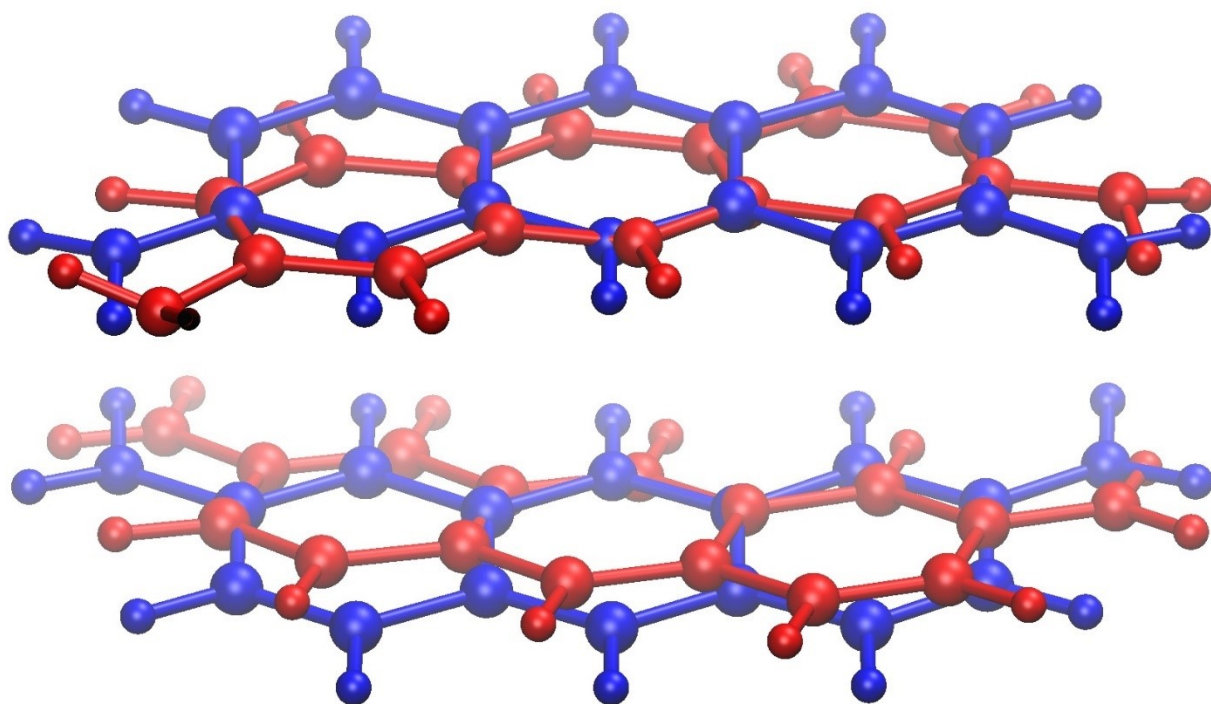

Fig. S11. Fitted structures of the proflavine dimer in the ground (blue) and excited (red) states, calculated using the M05 functional with GD3 correction

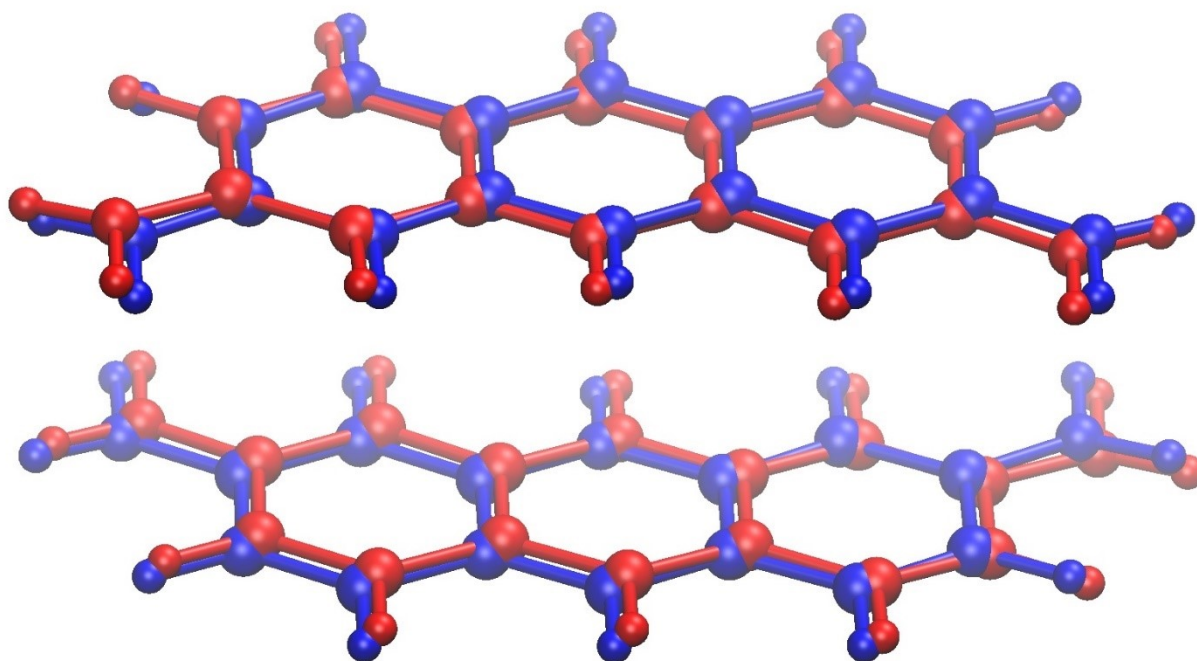

Fig. S12. Fitted structures of the proflavine dimer in the ground (blue) and excited (red) states, calculated using the M052X functional

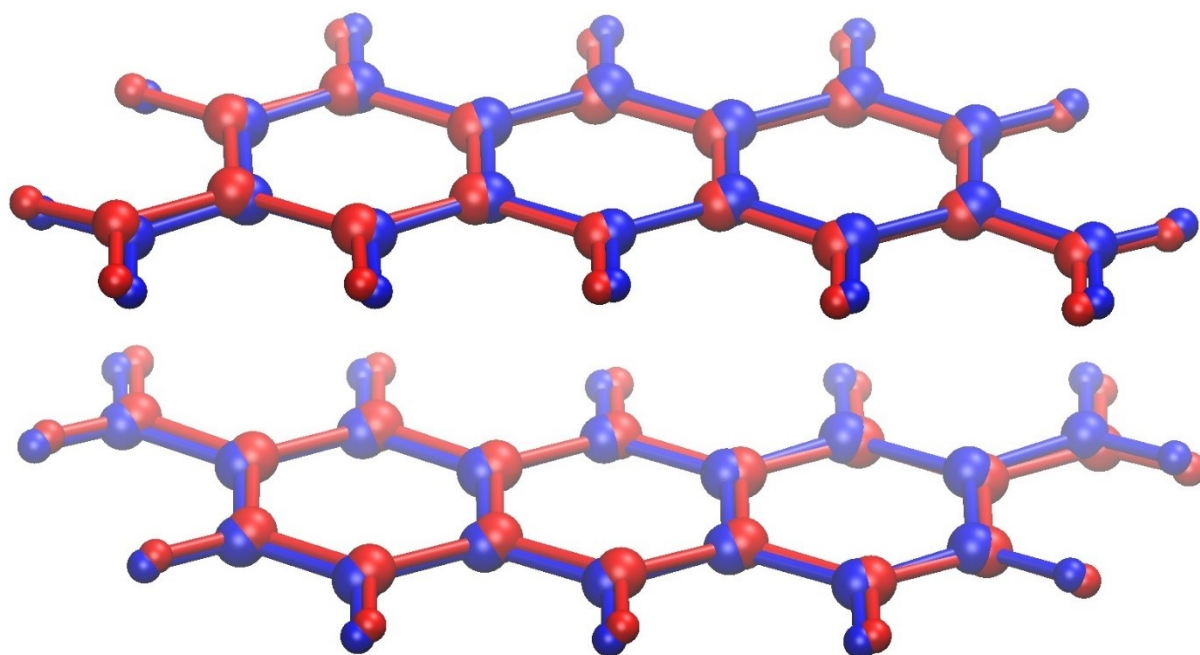

Fig. S13. Fitted structures of the proflavine dimer in the ground (blue) and excited (red) states, calculated using the M062X functional

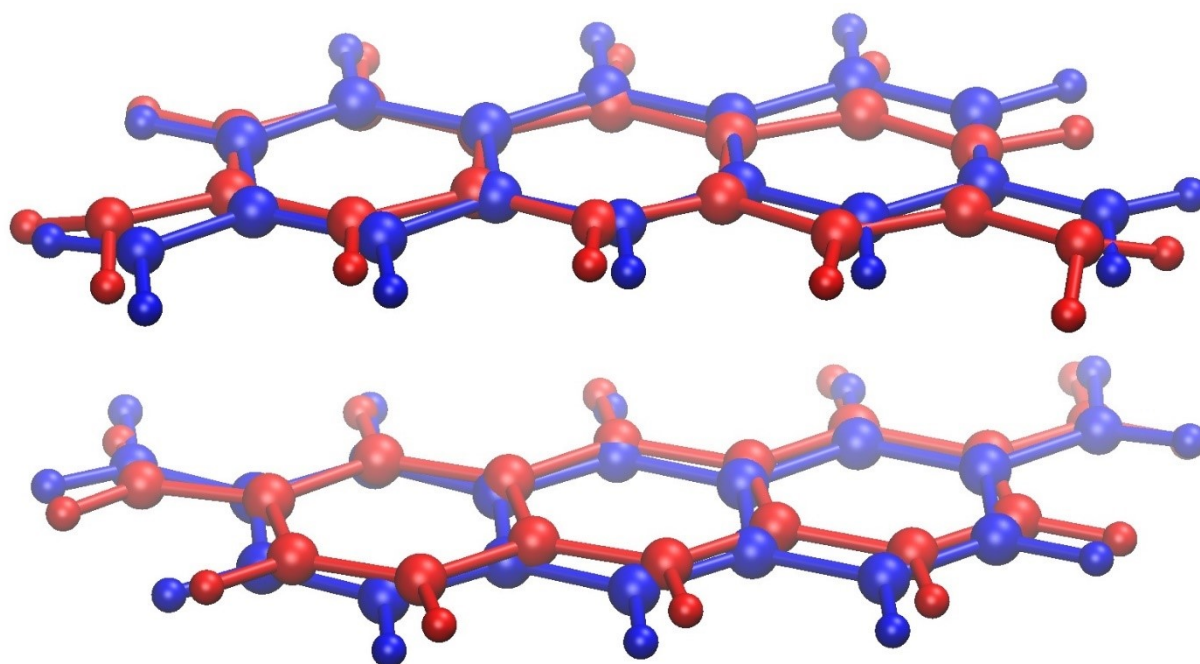

Fig. S14. Fitted structures of the proflavine dimer in the ground (blue) and excited (red) states, calculated using the PBE0 functional with GD3 correction



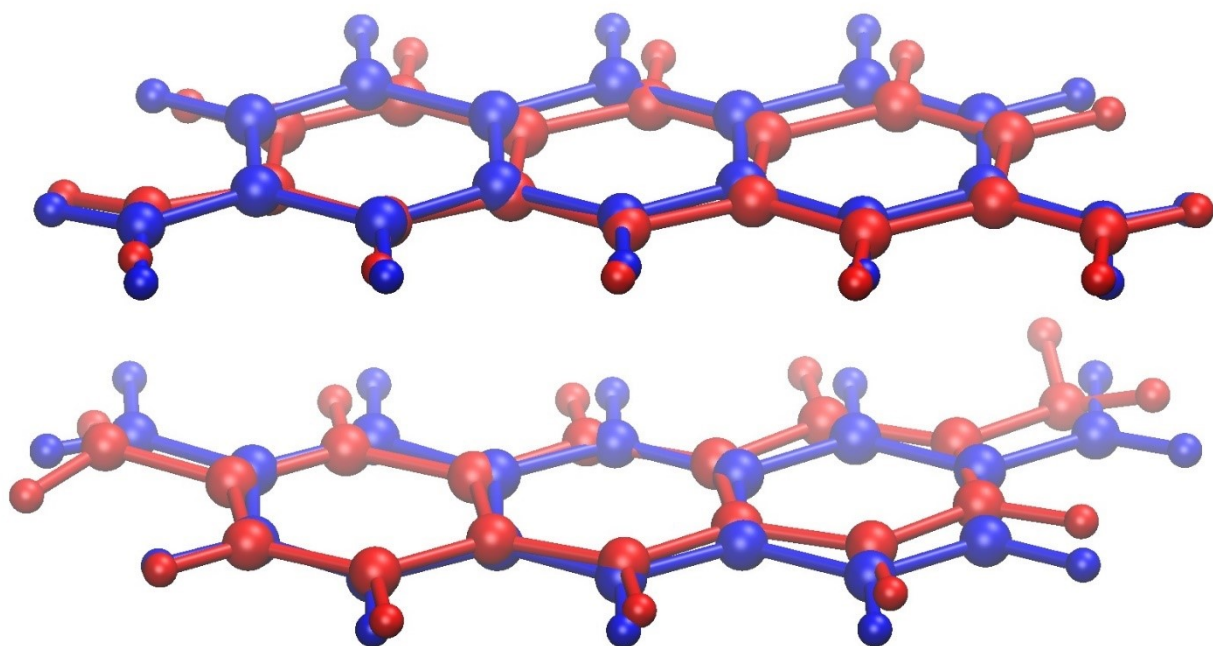

Fig. S15. Fitted structures of the proflavine dimer in the ground (blue) and excited (red) states, calculated using the PBE0 functional with GD3+BJ correction

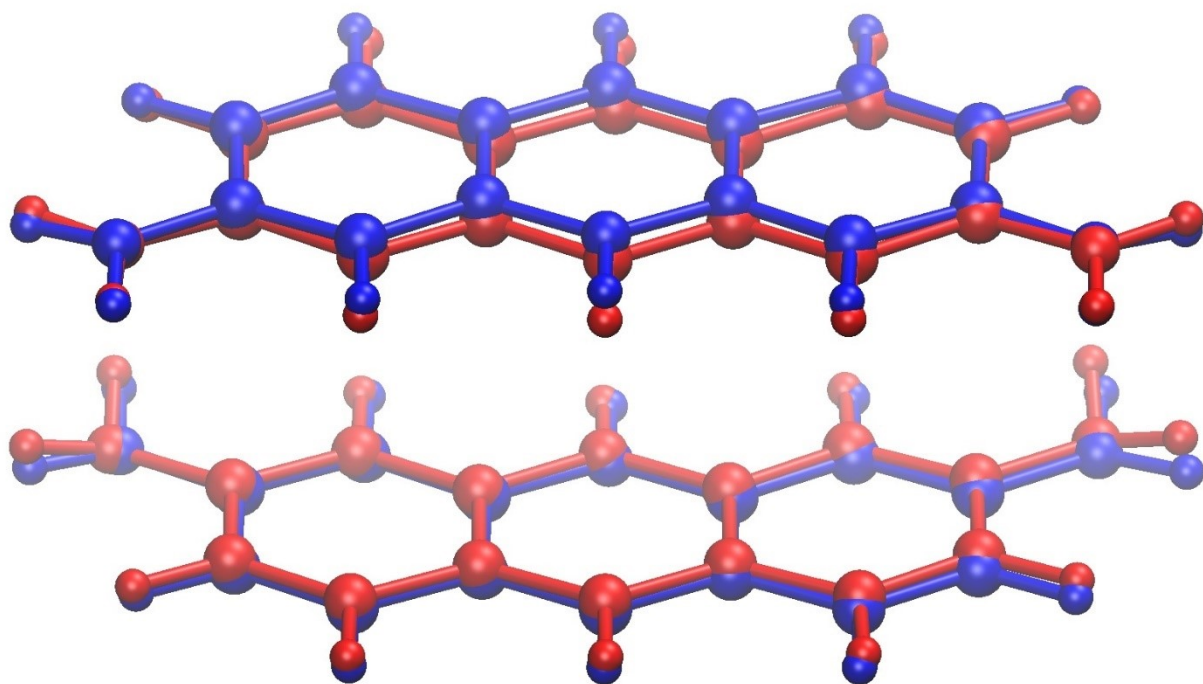

Fig. S16. Fitted structures of the proflavine dimer in the ground (blue) and excited (red) states, calculated using the PW6B95 functional with GD3 correction

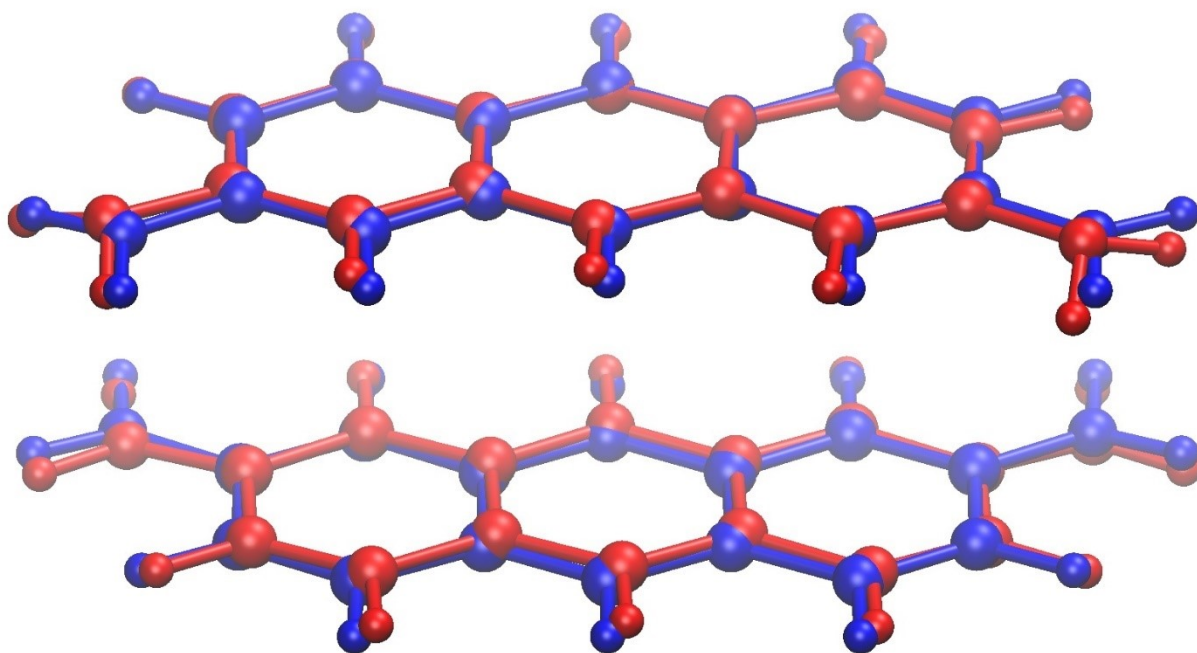

Fig. S17. Fitted structures of the proflavine dimer in the ground (blue) and excited (red) states, calculated using the PW6B95 functional with GD3+BJ correction

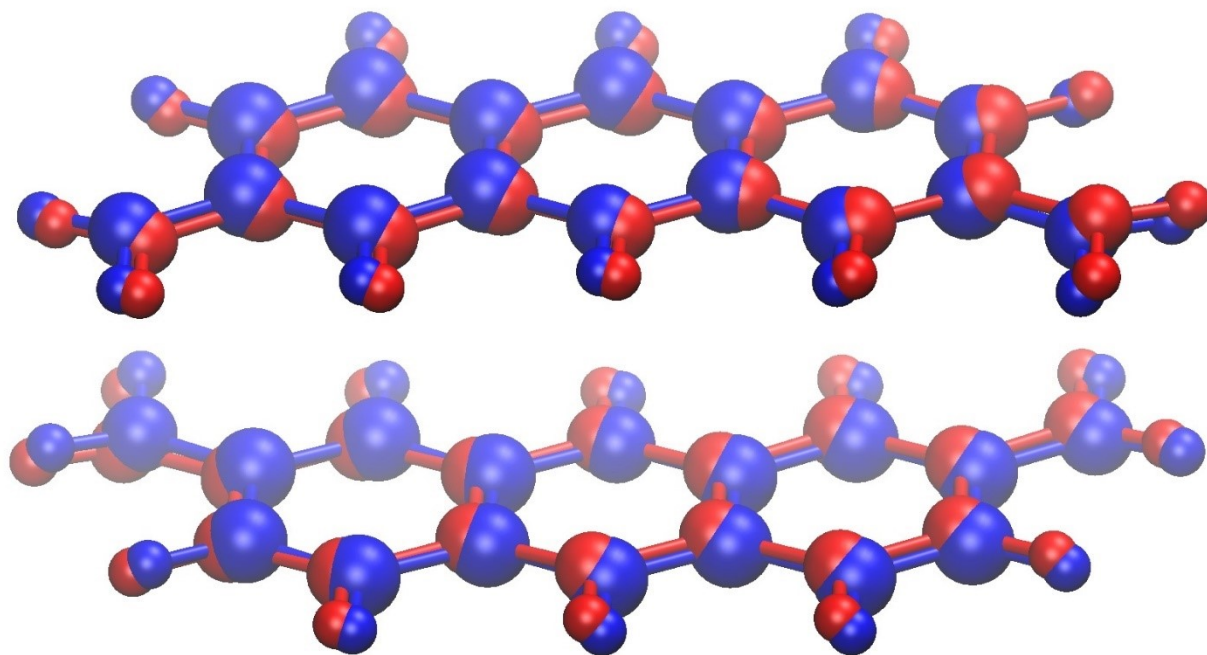

Fig. S18. Fitted structures of the proflavine dimer in the ground (blue) and excited (red) states, calculated using the  $\omega$ B97XD functional

Table S1. NPA charges ( $e$ ) of non-hydrogen atoms for free monomer (PF), molecules in a dimer (PF2\_1 and PF2\_2) in the ground (GS) and excited equilibrium (EES) states, and their changes ( $\Delta$ ) due to excitation ( $\Delta$ ) and dimerization ( $\Delta_{GS}$ ) obtained through APFD functional

| Atom | PF     |        |          | PF2_1  |        |          | PF2_2  |        |          | $\Delta_{GS}$<br>(PF2_1-PF) | $\Delta_{GS}$<br>(PF2_2-PF) |
|------|--------|--------|----------|--------|--------|----------|--------|--------|----------|-----------------------------|-----------------------------|
|      | GS     | EES    | $\Delta$ | GS     | EES    | $\Delta$ | GS     | EES    | $\Delta$ |                             |                             |
| C1   | -0.021 | -0.002 | 0.019    | -0.533 | -0.533 | 0.000    | -0.533 | -0.533 | 0.000    | -0.513                      | -0.512                      |
| C2   | 0.445  | 0.449  | 0.004    | -0.125 | -0.125 | 0.000    | -0.128 | -0.128 | 0.000    | -0.570                      | -0.572                      |
| C3   | -0.599 | -0.562 | 0.037    | 0.260  | 0.260  | 0.000    | 0.262  | 0.262  | 0.000    | 0.859                       | 0.861                       |
| N3   | -0.512 | -0.510 | 0.002    | -0.517 | -0.517 | 0.000    | -0.517 | -0.517 | 0.000    | -0.005                      | -0.005                      |
| C4   | -0.668 | -0.697 | -0.028   | -0.329 | -0.329 | 0.000    | -0.329 | -0.329 | 0.000    | 0.339                       | 0.340                       |
| C5   | -0.668 | -0.697 | -0.028   | -0.328 | -0.328 | 0.000    | -0.327 | -0.327 | 0.000    | 0.340                       | 0.341                       |
| C6   | -0.598 | -0.562 | 0.036    | 0.248  | 0.248  | 0.000    | 0.257  | 0.257  | 0.000    | 0.846                       | 0.855                       |
| N6   | -0.512 | -0.510 | 0.002    | -0.515 | -0.515 | 0.000    | -0.517 | -0.517 | 0.000    | -0.003                      | -0.005                      |
| C7   | 0.444  | 0.449  | 0.005    | -0.122 | -0.122 | 0.000    | -0.128 | -0.128 | 0.000    | -0.566                      | -0.573                      |
| C8   | -0.021 | -0.002 | 0.019    | -0.532 | -0.532 | 0.000    | -0.534 | -0.534 | 0.000    | -0.511                      | -0.513                      |
| C9   | 0.520  | 0.479  | -0.041   | 0.036  | 0.036  | 0.000    | 0.035  | 0.035  | 0.000    | -0.484                      | -0.485                      |
| N10  | -0.110 | -0.117 | -0.007   | -0.289 | -0.289 | 0.000    | -0.288 | -0.288 | 0.000    | -0.178                      | -0.178                      |
| C11  | 0.674  | 0.687  | 0.013    | 0.420  | 0.420  | 0.000    | 0.422  | 0.422  | 0.000    | -0.253                      | -0.252                      |
| C12  | -0.601 | -0.625 | -0.024   | -0.218 | -0.218 | 0.000    | -0.219 | -0.219 | 0.000    | 0.383                       | 0.381                       |
| C13  | -0.601 | -0.625 | -0.024   | -0.211 | -0.211 | 0.000    | -0.213 | -0.213 | 0.000    | 0.390                       | 0.388                       |
| C14  | 0.674  | 0.687  | 0.013    | 0.418  | 0.418  | 0.000    | 0.421  | 0.421  | 0.000    | -0.255                      | -0.253                      |

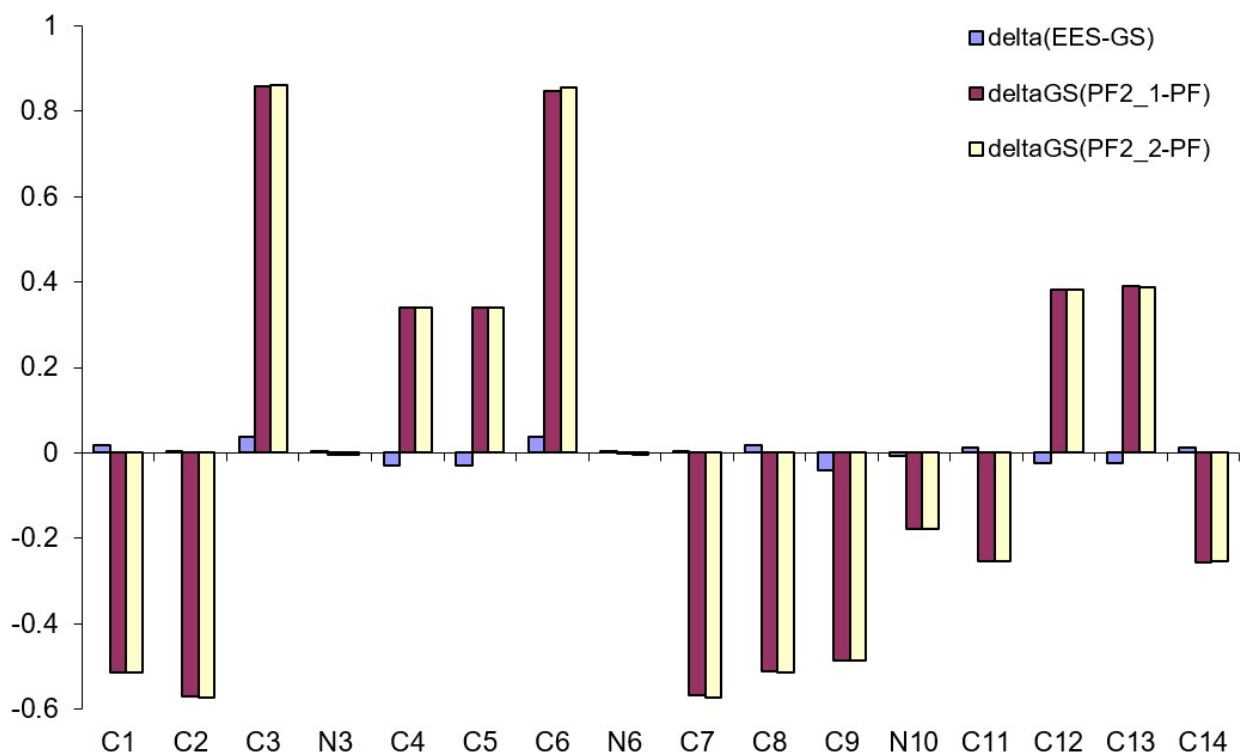

Fig. S19. Changes of NPA charges from Table S1



Table S2. NPA charges ( $e$ ) obtained through B2PLYP functional with GD2 correction

| Atom | PF     | PF2_1  | PF2_2  | deltaGS<br>(PF2_1-PF) | deltaGS<br>(PF2_2-PF) |
|------|--------|--------|--------|-----------------------|-----------------------|
|      | GS     | GS     | GS     |                       |                       |
| C1   | -0.023 | -0.060 | -0.102 | -0.037                | -0.079                |
| C2   | 0.334  | 0.093  | 0.124  | -0.241                | -0.210                |
| C3   | -0.408 | -0.203 | -0.220 | 0.205                 | 0.187                 |
| N3   | -0.536 | -0.452 | -0.451 | 0.085                 | 0.086                 |
| C4   | -0.581 | 0.010  | 0.059  | 0.591                 | 0.640                 |
| C5   | -0.581 | 0.047  | 0.034  | 0.628                 | 0.615                 |
| C6   | -0.408 | -0.197 | -0.237 | 0.211                 | 0.171                 |
| N6   | -0.536 | -0.450 | -0.447 | 0.086                 | 0.090                 |
| C7   | 0.334  | 0.053  | 0.130  | -0.281                | -0.204                |
| C8   | -0.023 | -0.064 | -0.083 | -0.041                | -0.060                |
| C9   | 0.490  | -0.688 | -0.660 | -1.179                | -1.150                |
| N10  | -0.234 | -0.201 | -0.239 | 0.033                 | -0.004                |
| C11  | 0.526  | 0.208  | 0.121  | -0.318                | -0.405                |
| C12  | -0.441 | -0.319 | -0.222 | 0.122                 | 0.219                 |
| C13  | -0.441 | -0.219 | -0.128 | 0.222                 | 0.313                 |
| C14  | 0.526  | 0.191  | 0.085  | -0.335                | -0.441                |

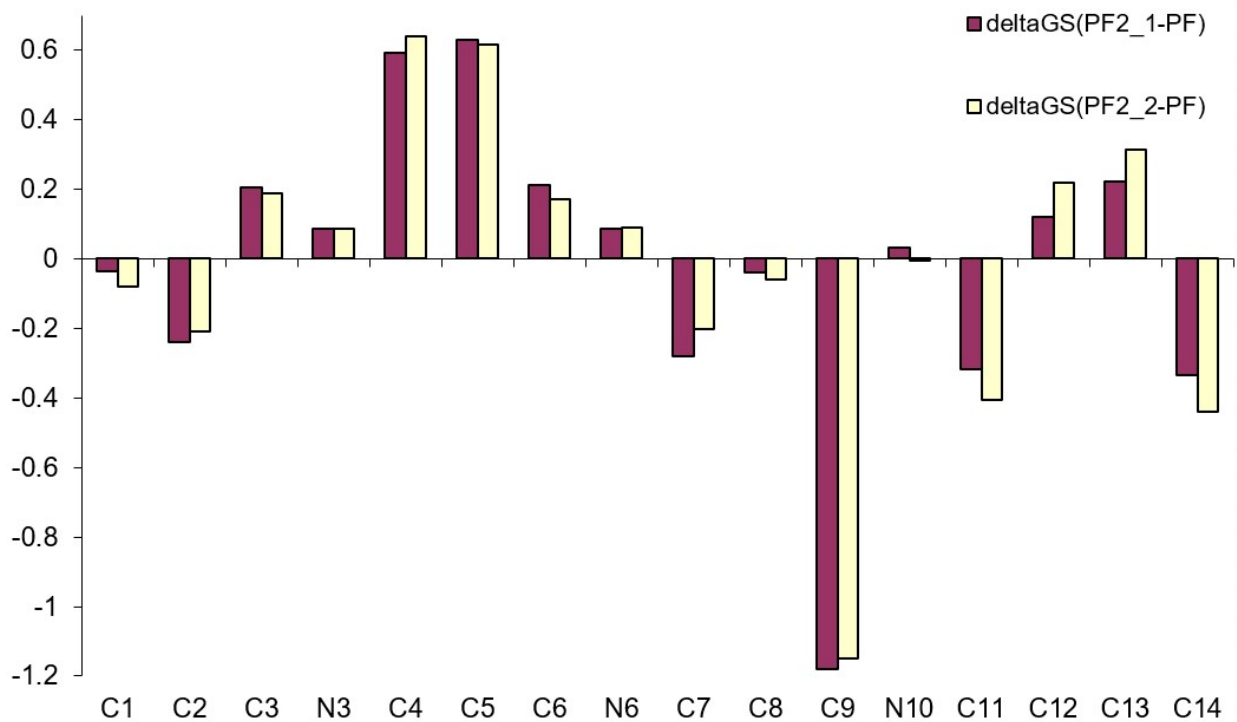

Fig. S20. Changes of NPA charges from Table S2

Table S3. NPA charges ( $e$ ) obtained through B2PLYP functional with GD3 correction

| Atom | PF     | PF2 1  | PF2 2  | deltaGS<br>(PF2 1-PF) | deltaGS<br>(PF2 2-PF) |
|------|--------|--------|--------|-----------------------|-----------------------|
|      | GS     | GS     | GS     |                       |                       |
| C1   | -0.023 | -0.487 | -0.486 | -0.464                | -0.463                |
| C2   | 0.334  | -0.061 | -0.074 | -0.395                | -0.408                |
| C3   | -0.408 | 0.213  | 0.234  | 0.621                 | 0.641                 |
| N3   | -0.536 | -0.531 | -0.536 | 0.005                 | 0.001                 |
| C4   | -0.581 | -0.331 | -0.331 | 0.250                 | 0.251                 |
| C5   | -0.581 | -0.330 | -0.330 | 0.251                 | 0.251                 |
| C6   | -0.408 | 0.221  | 0.227  | 0.629                 | 0.635                 |
| N6   | -0.536 | -0.533 | -0.534 | 0.003                 | 0.002                 |
| C7   | 0.334  | -0.064 | -0.071 | -0.398                | -0.405                |
| C8   | -0.023 | -0.487 | -0.486 | -0.464                | -0.463                |
| C9   | 0.490  | 0.168  | 0.166  | -0.322                | -0.324                |
| N10  | -0.234 | -0.353 | -0.354 | -0.119                | -0.120                |
| C11  | 0.526  | 0.468  | 0.467  | -0.058                | -0.059                |
| C12  | -0.441 | -0.264 | -0.267 | 0.177                 | 0.174                 |
| C13  | -0.441 | -0.264 | -0.264 | 0.176                 | 0.177                 |
| C14  | 0.526  | 0.466  | 0.466  | -0.060                | -0.060                |

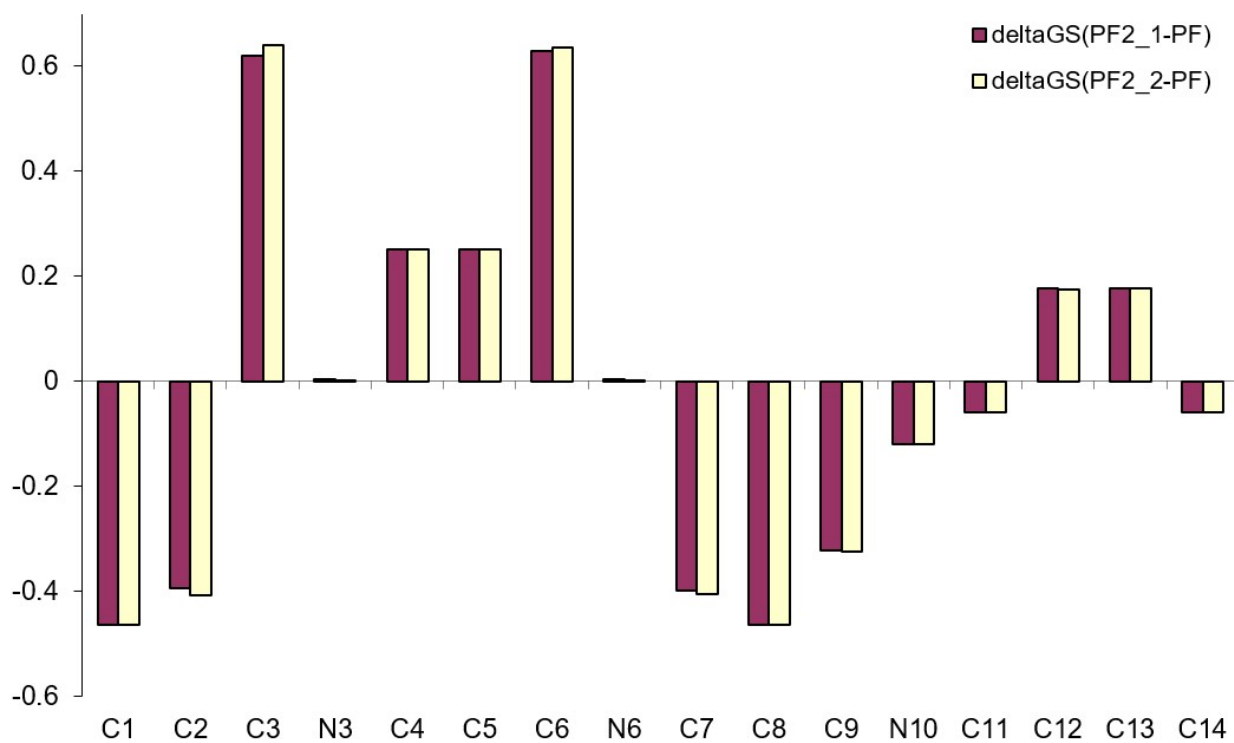

Fig. S21. Changes of NPA charges from Table S3

Table S4. NPA charges ( $e$ ) obtained through B2PLYP functional with GD3+BJ correction

| Atom | PF     | PF2 1  | PF2 2  | deltaGS    | deltaGS    |
|------|--------|--------|--------|------------|------------|
|      | GS     | GS     | GS     | (PF2 1-PF) | (PF2 2-PF) |
| C1   | -0.023 | -0.486 | -0.486 | -0.463     | -0.463     |
| C2   | 0.334  | -0.067 | -0.067 | -0.401     | -0.400     |
| C3   | -0.408 | 0.223  | 0.223  | 0.631      | 0.631      |
| N3   | -0.536 | -0.534 | -0.534 | 0.003      | 0.003      |
| C4   | -0.581 | -0.330 | -0.330 | 0.251      | 0.251      |
| C5   | -0.581 | -0.330 | -0.330 | 0.251      | 0.251      |
| C6   | -0.408 | 0.223  | 0.223  | 0.631      | 0.631      |
| N6   | -0.536 | -0.533 | -0.534 | 0.003      | 0.003      |
| C7   | 0.334  | -0.067 | -0.067 | -0.401     | -0.400     |
| C8   | -0.023 | -0.486 | -0.486 | -0.463     | -0.463     |
| C9   | 0.490  | 0.166  | 0.165  | -0.325     | -0.325     |
| N10  | -0.234 | -0.354 | -0.354 | -0.120     | -0.120     |
| C11  | 0.526  | 0.466  | 0.466  | -0.060     | -0.060     |
| C12  | -0.441 | -0.264 | -0.264 | 0.177      | 0.177      |
| C13  | -0.441 | -0.264 | -0.264 | 0.177      | 0.177      |
| C14  | 0.526  | 0.466  | 0.466  | -0.060     | -0.060     |

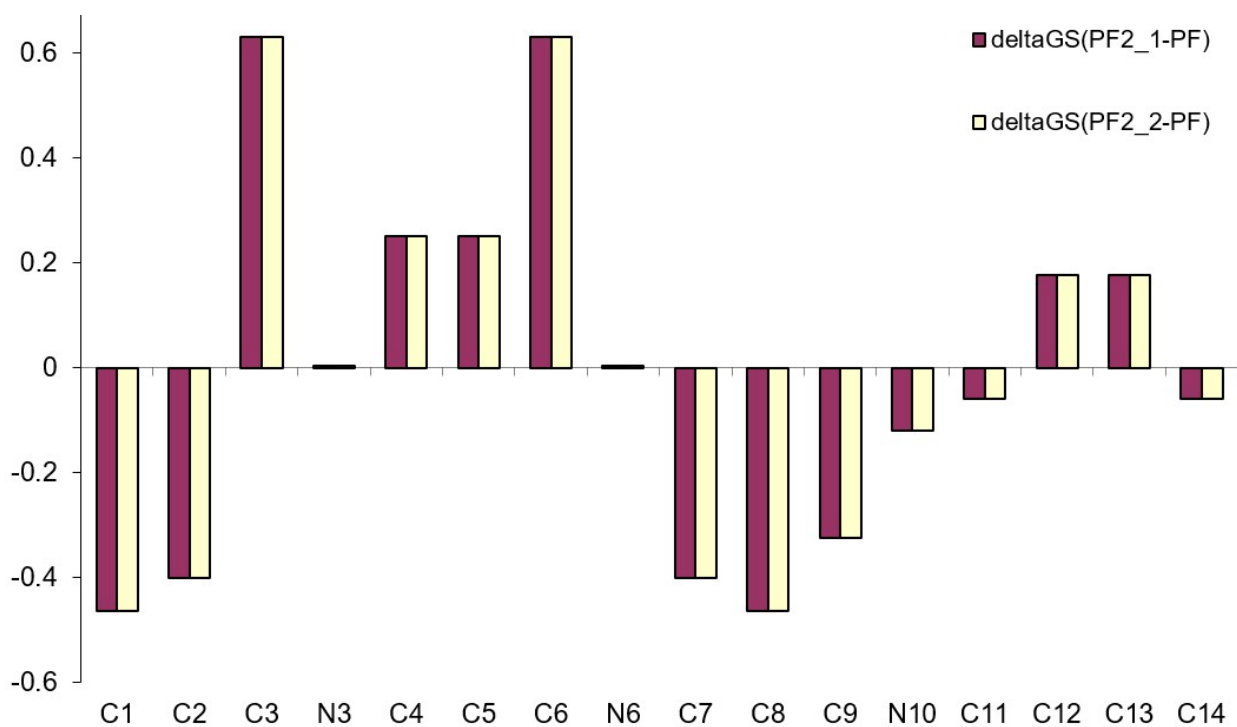

Fig. S22. Changes of NPA charges from Table S4



Table S5. NPA charges ( $e$ ) obtained through B3LYP functional with GD2 correction

| Atom | PF     |        |        | PF2 1  |        |        | PF2 2  |        |        | deltaGS<br>(PF2 1-PF) | deltaGS<br>(PF2 2-PF) |
|------|--------|--------|--------|--------|--------|--------|--------|--------|--------|-----------------------|-----------------------|
|      | GS     | EES    | delta  | GS     | EES    | delta  | GS     | EES    | delta  |                       |                       |
| C1   | -0.064 | 0.016  | 0.080  | -0.516 | -0.386 | 0.130  | -0.516 | -0.404 | 0.112  | -0.452                | -0.452                |
| C2   | 0.403  | 0.322  | -0.081 | -0.152 | -0.190 | -0.038 | -0.151 | -0.201 | -0.050 | -0.555                | -0.554                |
| C3   | -0.427 | -0.255 | 0.172  | 0.426  | 0.439  | 0.013  | 0.424  | 0.443  | 0.019  | 0.853                 | 0.851                 |
| N3   | -0.465 | -0.532 | -0.067 | -0.518 | -0.510 | 0.008  | -0.518 | -0.505 | 0.013  | -0.053                | -0.053                |
| C4   | -0.688 | -0.670 | 0.018  | -0.360 | -0.317 | 0.043  | -0.360 | -0.294 | 0.065  | 0.327                 | 0.328                 |
| C5   | -0.641 | -0.670 | -0.029 | -0.356 | -0.306 | 0.051  | -0.356 | -0.286 | 0.070  | 0.284                 | 0.284                 |
| C6   | -0.423 | -0.255 | 0.168  | 0.401  | 0.165  | -0.236 | 0.398  | 0.134  | -0.264 | 0.824                 | 0.821                 |
| N6   | -0.461 | -0.532 | -0.071 | -0.513 | -0.462 | 0.052  | -0.513 | -0.453 | 0.060  | -0.052                | -0.052                |
| C7   | 0.327  | 0.322  | -0.005 | -0.138 | 0.051  | 0.190  | -0.137 | 0.080  | 0.217  | -0.465                | -0.464                |
| C8   | -0.059 | 0.016  | 0.075  | -0.516 | -0.406 | 0.110  | -0.516 | -0.373 | 0.143  | -0.457                | -0.457                |
| C9   | 0.432  | 0.470  | 0.037  | 0.128  | -0.181 | -0.309 | 0.128  | -0.143 | -0.271 | -0.304                | -0.304                |
| N10  | -0.260 | -0.178 | 0.082  | -0.301 | -0.407 | -0.106 | -0.301 | -0.382 | -0.081 | -0.041                | -0.041                |
| C11  | 0.547  | 0.562  | 0.015  | 0.369  | 0.288  | -0.080 | 0.369  | 0.293  | -0.076 | -0.179                | -0.178                |
| C12  | -0.314 | -0.512 | -0.198 | -0.166 | -0.115 | 0.052  | -0.166 | -0.143 | 0.022  | 0.148                 | 0.149                 |
| C13  | -0.262 | -0.512 | -0.250 | -0.159 | -0.004 | 0.155  | -0.159 | -0.053 | 0.106  | 0.103                 | 0.103                 |
| C14  | 0.532  | 0.562  | 0.030  | 0.364  | 0.310  | -0.054 | 0.364  | 0.255  | -0.109 | -0.168                | -0.168                |

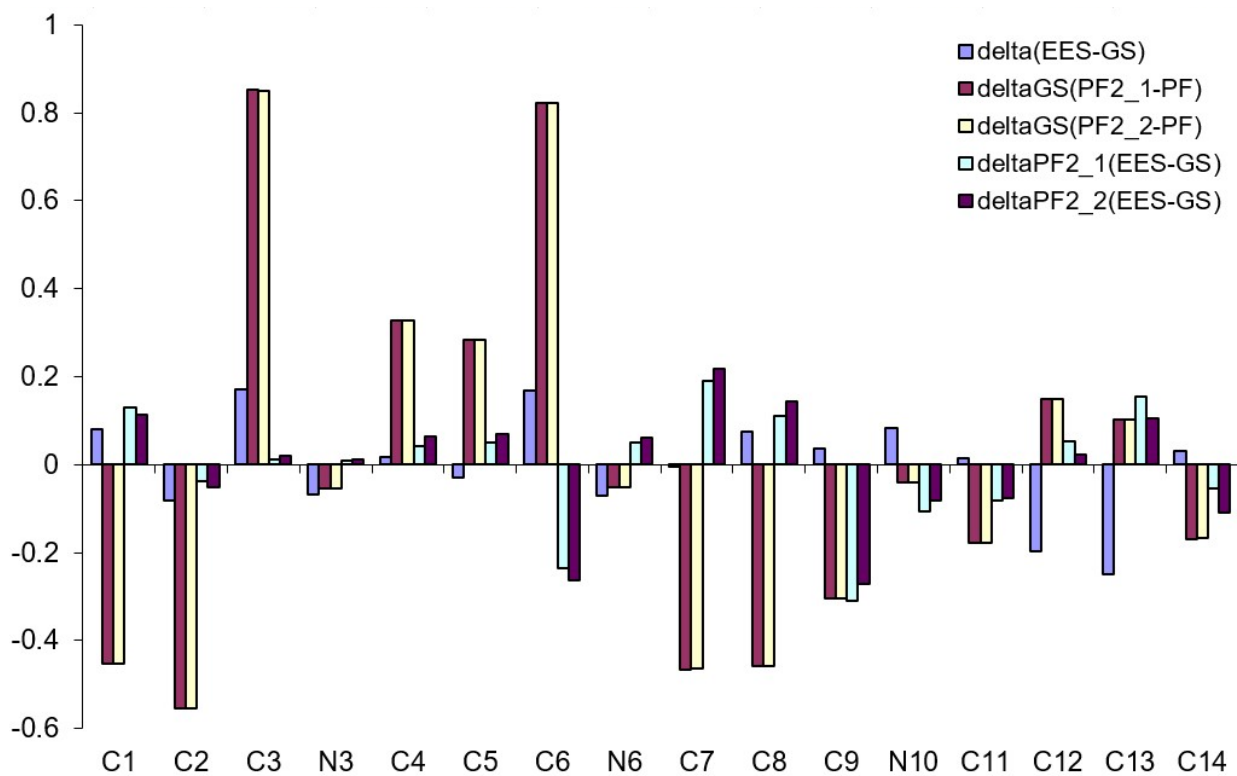

Fig. S23. Changes of NPA charges from Table S5

Table S6. NPA charges ( $e$ ) obtained through B3LYP functional with GD3 correction

| Atom | PF     |        |        | PF2_1  |        |        | PF2_2  |        |        | deltaGS<br>(PF2_1-PF) | deltaGS<br>(PF2_2-PF) |
|------|--------|--------|--------|--------|--------|--------|--------|--------|--------|-----------------------|-----------------------|
|      | GS     | EES    | delta  | GS     | EES    | delta  | GS     | EES    | delta  |                       |                       |
| C1   | -0.064 | 0.019  | 0.083  | -0.448 | -0.461 | -0.013 | -0.446 | -0.461 | -0.015 | -0.384                | -0.382                |
| C2   | 0.403  | 0.321  | -0.081 | -0.051 | -0.092 | -0.040 | -0.064 | -0.089 | -0.026 | -0.454                | -0.466                |
| C3   | -0.427 | -0.248 | 0.179  | 0.265  | 0.341  | 0.076  | 0.284  | 0.336  | 0.052  | 0.692                 | 0.711                 |
| N3   | -0.465 | -0.534 | -0.069 | -0.489 | -0.508 | -0.019 | -0.492 | -0.507 | -0.014 | -0.024                | -0.027                |
| C4   | -0.688 | -0.671 | 0.016  | -0.401 | -0.378 | 0.023  | -0.401 | -0.378 | 0.023  | 0.287                 | 0.287                 |
| C5   | -0.641 | -0.672 | -0.031 | -0.400 | -0.377 | 0.023  | -0.400 | -0.378 | 0.021  | 0.241                 | 0.241                 |
| C6   | -0.423 | -0.247 | 0.176  | 0.272  | 0.330  | 0.058  | 0.277  | 0.334  | 0.056  | 0.695                 | 0.700                 |
| N6   | -0.461 | -0.534 | -0.073 | -0.490 | -0.506 | -0.016 | -0.491 | -0.506 | -0.015 | -0.029                | -0.030                |
| C7   | 0.327  | 0.321  | -0.006 | -0.054 | -0.086 | -0.031 | -0.061 | -0.086 | -0.025 | -0.382                | -0.388                |
| C8   | -0.059 | 0.019  | 0.078  | -0.448 | -0.461 | -0.013 | -0.446 | -0.461 | -0.015 | -0.389                | -0.387                |
| C9   | 0.432  | 0.469  | 0.037  | 0.201  | 0.111  | -0.090 | 0.199  | 0.111  | -0.088 | -0.232                | -0.233                |
| N10  | -0.260 | -0.179 | 0.082  | -0.271 | -0.264 | 0.006  | -0.271 | -0.264 | 0.007  | -0.011                | -0.011                |
| C11  | 0.547  | 0.558  | 0.011  | 0.511  | 0.461  | -0.050 | 0.510  | 0.462  | -0.048 | -0.036                | -0.037                |
| C12  | -0.314 | -0.514 | -0.200 | -0.343 | -0.280 | 0.062  | -0.346 | -0.280 | 0.066  | -0.028                | -0.031                |
| C13  | -0.262 | -0.514 | -0.252 | -0.343 | -0.279 | 0.065  | -0.343 | -0.280 | 0.063  | -0.081                | -0.081                |
| C14  | 0.532  | 0.558  | 0.026  | 0.509  | 0.460  | -0.050 | 0.509  | 0.460  | -0.049 | -0.022                | -0.022                |

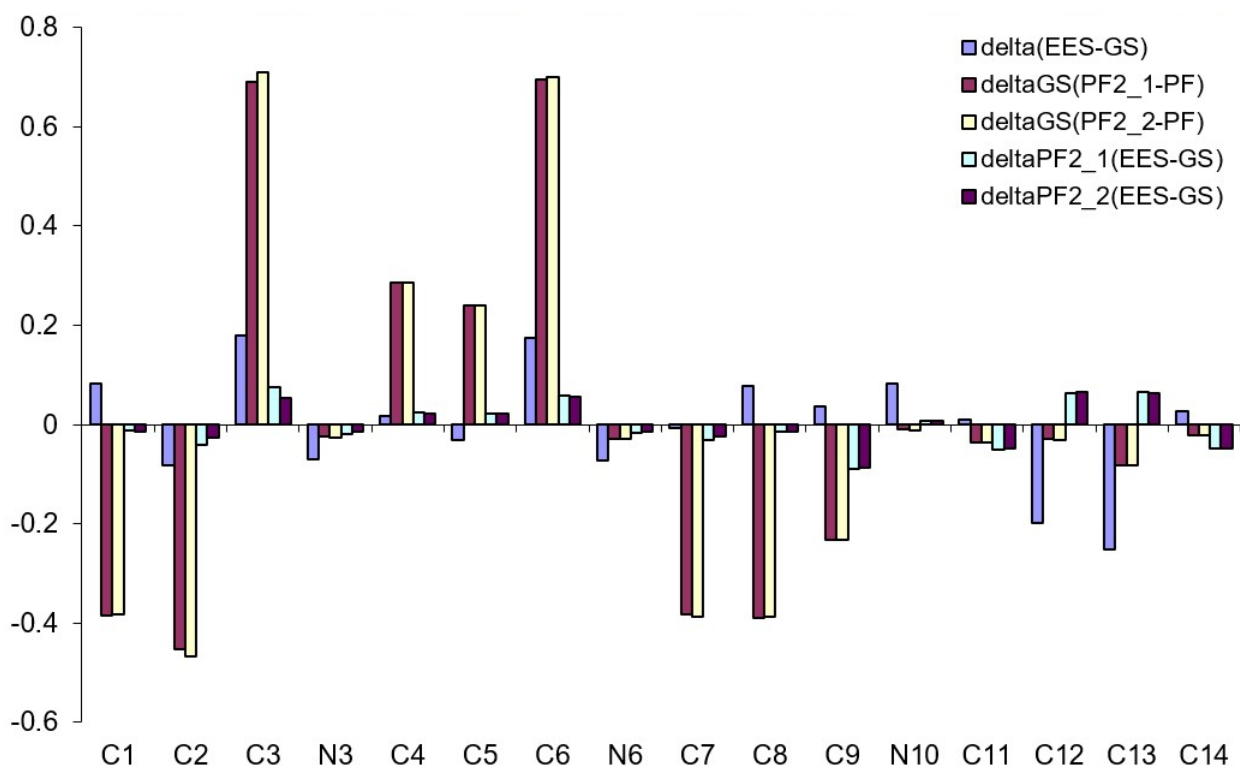

Fig. S24. Changes of NPA charges from Table S6

Table S7. NPA charges ( $e$ ) obtained through B3LYP functional with GD3+BJ correction

| Atom | PF     |        |        | PF2_1  |        |        | PF2_2  |        |        | deltaGS    | deltaGS    |
|------|--------|--------|--------|--------|--------|--------|--------|--------|--------|------------|------------|
|      | GS     | EES    | delta  | GS     | EES    | delta  | GS     | EES    | delta  | (PF2_1-PF) | (PF2_2-PF) |
| C1   | -0.064 | 0.018  | 0.082  | -0.448 | -0.126 | 0.322  | -0.446 | -0.466 | -0.020 | -0.384     | -0.382     |
| C2   | 0.403  | 0.323  | -0.079 | -0.051 | 0.444  | 0.495  | -0.064 | -0.029 | 0.035  | -0.454     | -0.466     |
| C3   | -0.427 | -0.253 | 0.174  | 0.265  | -0.303 | -0.568 | 0.284  | 0.019  | -0.265 | 0.692      | 0.711      |
| N3   | -0.465 | -0.533 | -0.069 | -0.489 | -0.418 | 0.070  | -0.492 | -0.440 | 0.052  | -0.024     | -0.027     |
| C4   | -0.688 | -0.672 | 0.016  | -0.401 | -0.190 | 0.211  | -0.401 | -0.245 | 0.155  | 0.287      | 0.287      |
| C5   | -0.641 | -0.672 | -0.032 | -0.400 | -0.290 | 0.110  | -0.400 | -0.233 | 0.166  | 0.241      | 0.241      |
| C6   | -0.423 | -0.253 | 0.170  | 0.272  | 0.454  | 0.182  | 0.277  | 0.018  | -0.260 | 0.695      | 0.700      |
| N6   | -0.461 | -0.534 | -0.072 | -0.490 | -0.500 | -0.010 | -0.491 | -0.459 | 0.033  | -0.029     | -0.030     |
| C7   | 0.327  | 0.323  | -0.004 | -0.054 | -0.042 | 0.012  | -0.061 | -0.022 | 0.039  | -0.382     | -0.388     |
| C8   | -0.059 | 0.018  | 0.077  | -0.448 | -0.528 | -0.080 | -0.446 | -0.067 | 0.379  | -0.389     | -0.387     |
| C9   | 0.432  | 0.472  | 0.040  | 0.201  | -0.109 | -0.309 | 0.199  | -0.169 | -0.368 | -0.232     | -0.233     |
| N10  | -0.260 | -0.179 | 0.082  | -0.271 | -0.188 | 0.083  | -0.271 | -0.218 | 0.053  | -0.011     | -0.011     |
| C11  | 0.547  | 0.561  | 0.014  | 0.511  | -0.199 | -0.710 | 0.510  | 0.183  | -0.327 | -0.036     | -0.037     |
| C12  | -0.314 | -0.514 | -0.200 | -0.343 | -0.122 | 0.221  | -0.346 | -0.086 | 0.259  | -0.028     | -0.031     |
| C13  | -0.262 | -0.514 | -0.252 | -0.343 | -0.201 | 0.142  | -0.343 | -0.208 | 0.135  | -0.081     | -0.081     |
| C14  | 0.532  | 0.562  | 0.030  | 0.509  | 0.260  | -0.250 | 0.509  | 0.380  | -0.130 | -0.022     | -0.022     |

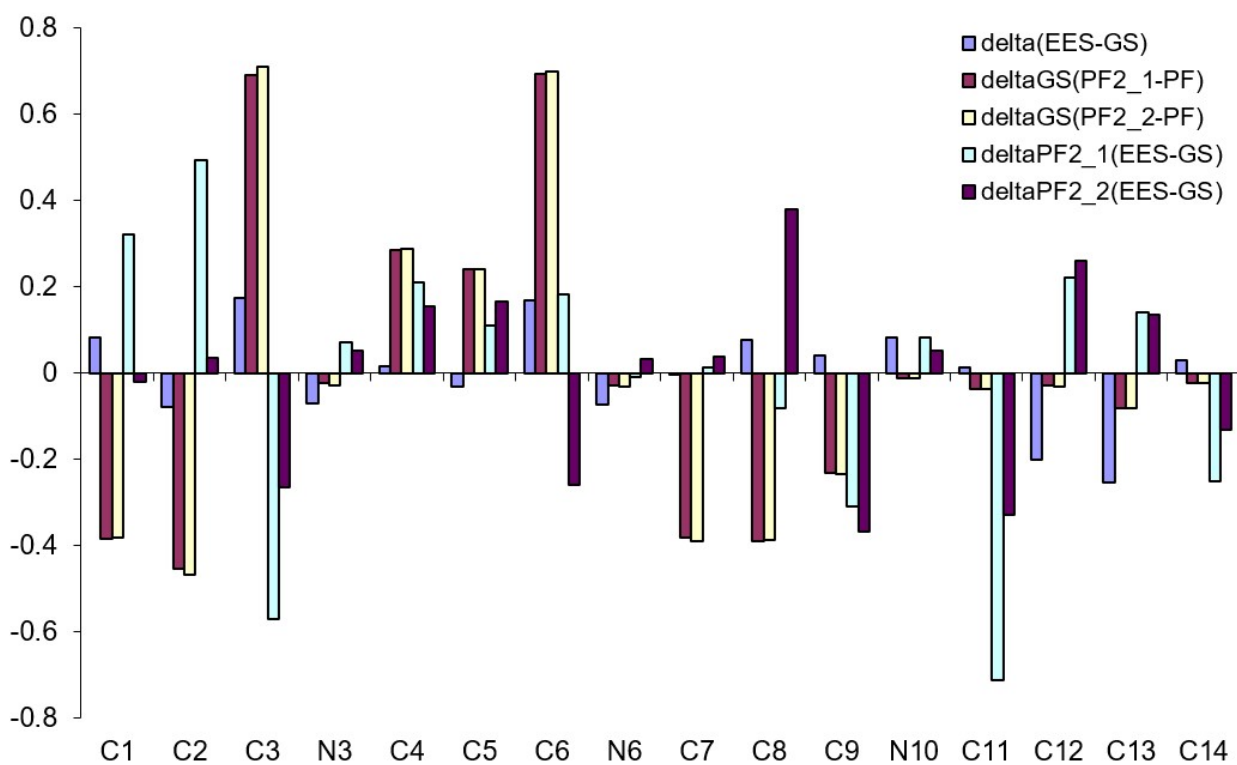

Fig. S25. Changes of NPA charges from Table S7



Table S8. NPA charges ( $e$ ) obtained through B3PW91 functional with GD3 correction

| Atom | PF     |        |        | PF2_1  |        |        | PF2_2  |        |        | deltaGS    | deltaGS    |
|------|--------|--------|--------|--------|--------|--------|--------|--------|--------|------------|------------|
|      | GS     | EES    | delta  | GS     | EES    | delta  | GS     | EES    | delta  | (PF2_1-PF) | (PF2_2-PF) |
| C1   | -0.094 | -0.006 | 0.088  | -0.528 | -0.508 | 0.020  | -0.529 | -0.508 | 0.020  | -0.434     | -0.435     |
| C2   | 0.534  | 0.439  | -0.094 | -0.098 | -0.078 | 0.020  | -0.097 | -0.078 | 0.018  | -0.632     | -0.630     |
| C3   | -0.774 | -0.589 | 0.185  | 0.232  | 0.197  | -0.035 | 0.230  | 0.199  | -0.031 | 1.006      | 1.004      |
| N3   | -0.442 | -0.508 | -0.066 | -0.505 | -0.496 | 0.009  | -0.504 | -0.496 | 0.008  | -0.062     | -0.062     |
| C4   | -0.658 | -0.648 | 0.010  | -0.328 | -0.333 | -0.005 | -0.328 | -0.333 | -0.005 | 0.330      | 0.330      |
| C5   | -0.607 | -0.648 | -0.041 | -0.325 | -0.328 | -0.003 | -0.325 | -0.328 | -0.003 | 0.282      | 0.282      |
| C6   | -0.769 | -0.589 | 0.181  | 0.206  | 0.176  | -0.030 | 0.203  | 0.171  | -0.032 | 0.975      | 0.973      |
| N6   | -0.437 | -0.508 | -0.071 | -0.499 | -0.493 | 0.007  | -0.499 | -0.492 | 0.007  | -0.062     | -0.061     |
| C7   | 0.445  | 0.439  | -0.006 | -0.083 | -0.069 | 0.015  | -0.082 | -0.066 | 0.015  | -0.528     | -0.526     |
| C8   | -0.088 | -0.006 | 0.081  | -0.528 | -0.509 | 0.018  | -0.528 | -0.509 | 0.019  | -0.440     | -0.441     |
| C9   | 0.462  | 0.508  | 0.047  | 0.047  | 0.048  | 0.001  | 0.047  | 0.048  | 0.001  | -0.414     | -0.414     |
| N10  | -0.191 | -0.108 | 0.083  | -0.269 | -0.273 | -0.004 | -0.270 | -0.273 | -0.004 | -0.078     | -0.079     |
| C11  | 0.644  | 0.667  | 0.022  | 0.388  | 0.405  | 0.017  | 0.388  | 0.404  | 0.016  | -0.257     | -0.256     |
| C12  | -0.377 | -0.590 | -0.213 | -0.175 | -0.194 | -0.018 | -0.175 | -0.193 | -0.018 | 0.201      | 0.202      |
| C13  | -0.316 | -0.589 | -0.273 | -0.167 | -0.184 | -0.017 | -0.167 | -0.184 | -0.017 | 0.149      | 0.149      |
| C14  | 0.633  | 0.667  | 0.034  | 0.383  | 0.401  | 0.019  | 0.383  | 0.401  | 0.018  | -0.250     | -0.250     |

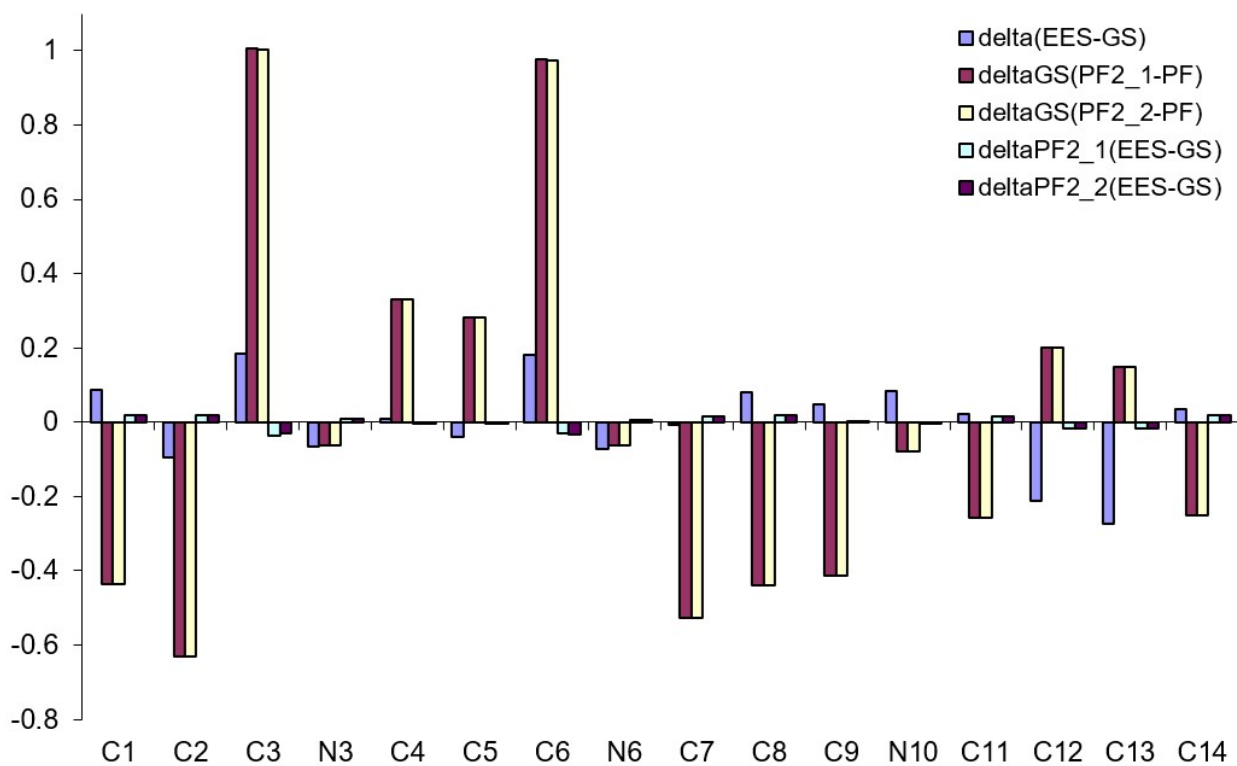

Fig. S26. Changes of NPA charges from Table S8

Table S9. NPA charges ( $e$ ) obtained through B3PW91 functional with GD3+BJ correction

| Atom | PF     |        |        | PF2 1  |        |        | PF2 2  |        |        | deltaGS    | deltaGS    |
|------|--------|--------|--------|--------|--------|--------|--------|--------|--------|------------|------------|
|      | GS     | EES    | delta  | GS     | EES    | delta  | GS     | EES    | delta  | (PF2 1-PF) | (PF2 2-PF) |
| C1   | -0.094 | -0.007 | 0.086  | -0.523 | -0.501 | 0.022  | -0.522 | -0.499 | 0.023  | -0.429     | -0.428     |
| C2   | 0.534  | 0.442  | -0.092 | -0.047 | -0.086 | -0.039 | -0.037 | -0.078 | -0.041 | -0.581     | -0.571     |
| C3   | -0.774 | -0.595 | 0.179  | 0.161  | 0.202  | 0.041  | 0.146  | 0.190  | 0.043  | 0.935      | 0.920      |
| N3   | -0.442 | -0.508 | -0.065 | -0.502 | -0.497 | 0.005  | -0.499 | -0.495 | 0.004  | -0.060     | -0.057     |
| C4   | -0.658 | -0.649 | 0.009  | -0.330 | -0.321 | 0.009  | -0.331 | -0.322 | 0.009  | 0.328      | 0.327      |
| C5   | -0.607 | -0.649 | -0.042 | -0.330 | -0.320 | 0.010  | -0.330 | -0.320 | 0.010  | 0.277      | 0.276      |
| C6   | -0.769 | -0.595 | 0.175  | 0.140  | 0.183  | 0.043  | 0.142  | 0.182  | 0.040  | 0.909      | 0.911      |
| N6   | -0.437 | -0.508 | -0.070 | -0.498 | -0.494 | 0.004  | -0.498 | -0.494 | 0.005  | -0.061     | -0.061     |
| C7   | 0.445  | 0.442  | -0.003 | -0.034 | -0.075 | -0.041 | -0.033 | -0.073 | -0.039 | -0.479     | -0.478     |
| C8   | -0.088 | -0.007 | 0.080  | -0.521 | -0.499 | 0.021  | -0.522 | -0.501 | 0.021  | -0.433     | -0.434     |
| C9   | 0.462  | 0.512  | 0.051  | 0.007  | 0.035  | 0.028  | 0.008  | 0.036  | 0.028  | -0.455     | -0.454     |
| N10  | -0.191 | -0.108 | 0.083  | -0.236 | -0.280 | -0.044 | -0.237 | -0.281 | -0.044 | -0.046     | -0.046     |
| C11  | 0.644  | 0.670  | 0.025  | 0.523  | 0.417  | -0.106 | 0.522  | 0.417  | -0.105 | -0.122     | -0.123     |
| C12  | -0.377 | -0.589 | -0.212 | -0.284 | -0.210 | 0.074  | -0.282 | -0.209 | 0.073  | 0.093      | 0.095      |
| C13  | -0.316 | -0.589 | -0.273 | -0.281 | -0.207 | 0.073  | -0.281 | -0.206 | 0.074  | 0.035      | 0.035      |
| C14  | 0.633  | 0.670  | 0.037  | 0.520  | 0.415  | -0.104 | 0.519  | 0.414  | -0.105 | -0.113     | -0.114     |

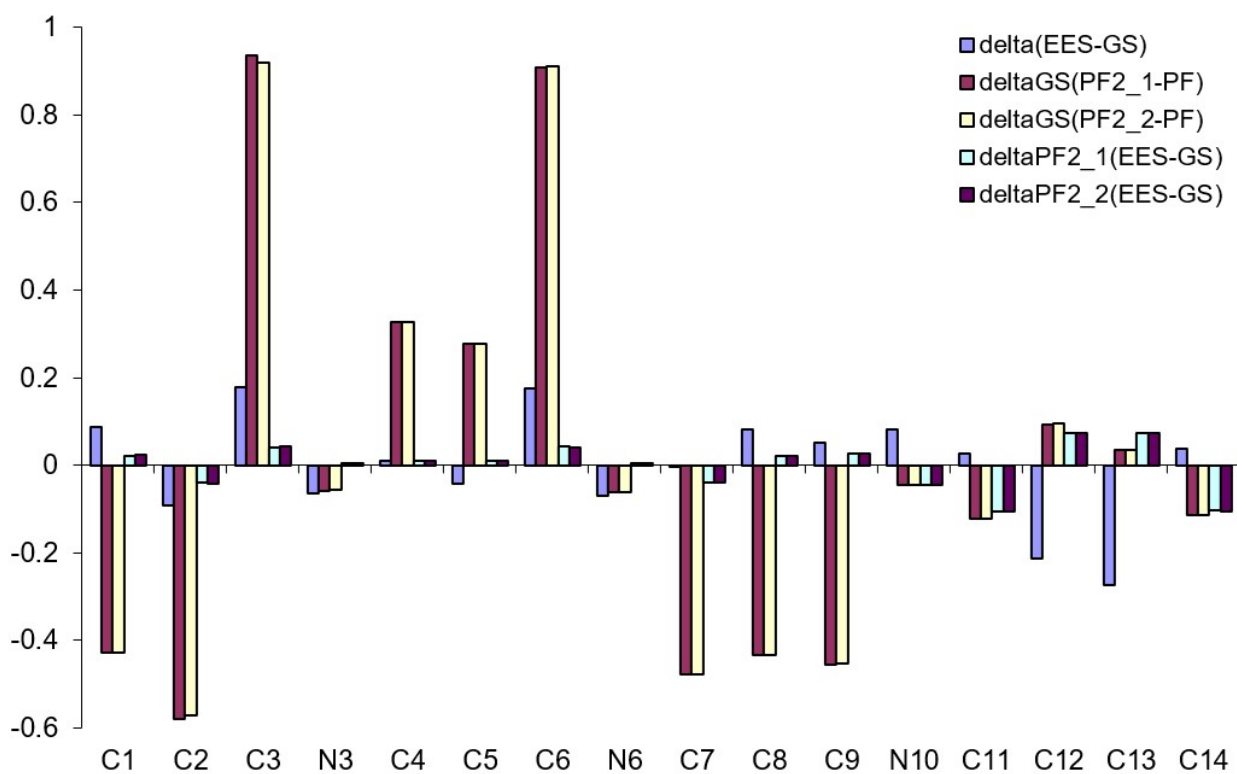

Fig. S27. Changes of NPA charges from Table S9

Table S10. NPA charges ( $e$ ) obtained through BMK functional with GD3 correction

| Atom | PF     |        |        | PF2 1  |        |        | PF2 2  |        |        | deltaGS<br>(PF2 1-PF) | deltaGS<br>(PF2 2-PF) |
|------|--------|--------|--------|--------|--------|--------|--------|--------|--------|-----------------------|-----------------------|
|      | GS     | EES    | delta  | GS     | EES    | delta  | GS     | EES    | delta  |                       |                       |
| C1   | -0.045 | 0.038  | 0.084  | -0.486 | -0.363 | 0.124  | -0.487 | -0.353 | 0.134  | -0.441                | -0.442                |
| C2   | 0.254  | 0.217  | -0.037 | -0.199 | -0.142 | 0.057  | -0.197 | -0.121 | 0.077  | -0.453                | -0.452                |
| C3   | -0.219 | -0.127 | 0.092  | 0.564  | 0.323  | -0.241 | 0.562  | 0.310  | -0.252 | 0.784                 | 0.781                 |
| N3   | -0.541 | -0.596 | -0.055 | -0.599 | -0.563 | 0.036  | -0.599 | -0.556 | 0.043  | -0.058                | -0.058                |
| C4   | -0.551 | -0.530 | 0.020  | -0.278 | -0.239 | 0.040  | -0.278 | -0.265 | 0.013  | 0.272                 | 0.273                 |
| C5   | -0.513 | -0.531 | -0.018 | -0.273 | -0.247 | 0.026  | -0.272 | -0.221 | 0.051  | 0.240                 | 0.241                 |
| C6   | -0.208 | -0.127 | 0.081  | 0.535  | 0.717  | 0.182  | 0.532  | 0.662  | 0.130  | 0.742                 | 0.739                 |
| N6   | -0.538 | -0.596 | -0.058 | -0.593 | -0.602 | -0.008 | -0.593 | -0.594 | -0.001 | -0.055                | -0.054                |
| C7   | 0.196  | 0.217  | 0.021  | -0.185 | -0.148 | 0.037  | -0.183 | -0.123 | 0.060  | -0.381                | -0.380                |
| C8   | -0.034 | 0.038  | 0.072  | -0.486 | -0.497 | -0.011 | -0.486 | -0.467 | 0.019  | -0.452                | -0.452                |
| C9   | 0.317  | 0.347  | 0.029  | 0.236  | 0.212  | -0.024 | 0.236  | 0.221  | -0.016 | -0.081                | -0.081                |
| N10  | -0.341 | -0.255 | 0.086  | -0.466 | -0.453 | 0.014  | -0.467 | -0.459 | 0.008  | -0.125                | -0.126                |
| C11  | 0.490  | 0.515  | 0.026  | 0.338  | 0.247  | -0.091 | 0.338  | 0.243  | -0.095 | -0.152                | -0.152                |
| C12  | -0.273 | -0.469 | -0.196 | -0.156 | -0.022 | 0.134  | -0.156 | -0.045 | 0.111  | 0.117                 | 0.117                 |
| C13  | -0.240 | -0.468 | -0.229 | -0.148 | -0.369 | -0.221 | -0.147 | -0.342 | -0.195 | 0.092                 | 0.093                 |
| C14  | 0.475  | 0.515  | 0.041  | 0.334  | 0.275  | -0.059 | 0.334  | 0.246  | -0.088 | -0.141                | -0.141                |

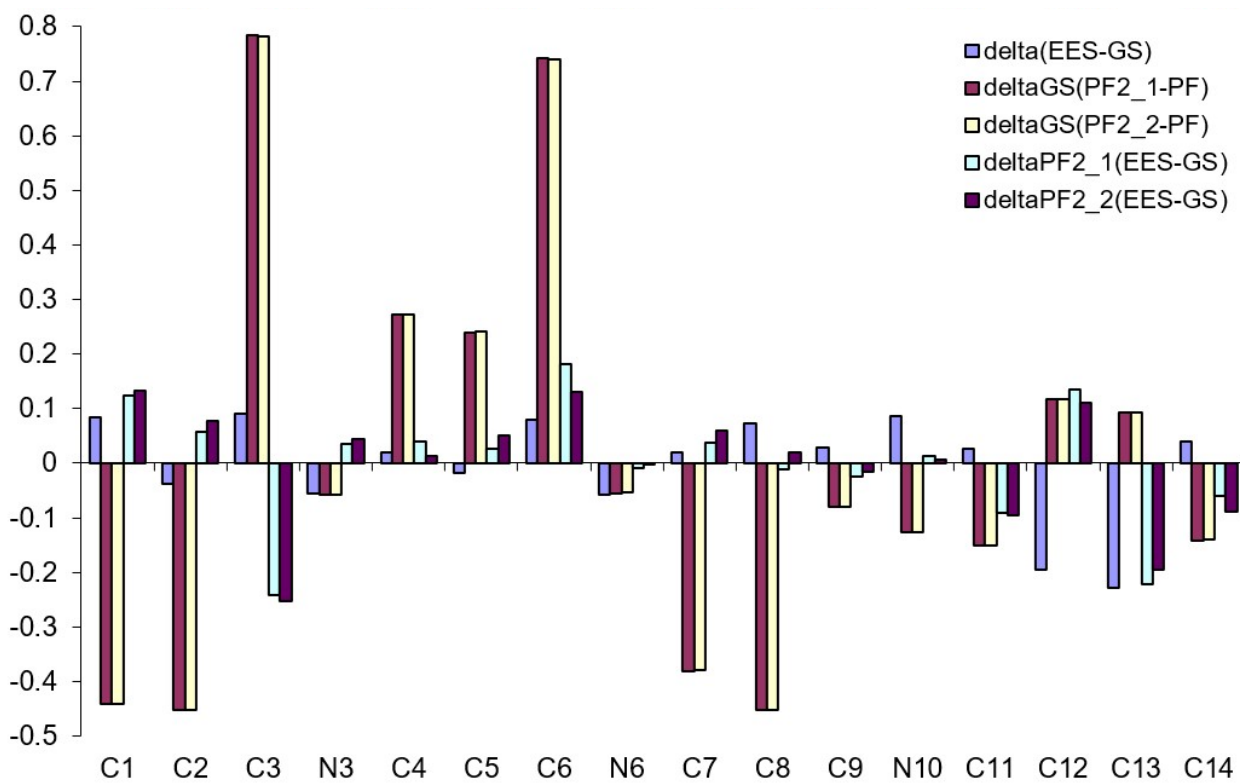

Fig. S28. Changes of NPA charges from Table S10

Table S11. NPA charges ( $e$ ) obtained through BMK functional with GD3+BJ correction

| Atom | PF     |        |        | PF2 1  |        |        | PF2 2  |        |        | deltaGS    | deltaGS    |
|------|--------|--------|--------|--------|--------|--------|--------|--------|--------|------------|------------|
|      | GS     | EES    | delta  | GS     | EES    | delta  | GS     | EES    | delta  | (PF2 1-PF) | (PF2 2-PF) |
| C1   | -0.045 | 0.038  | 0.083  | -0.440 | -0.366 | 0.073  | -0.440 | -0.400 | 0.040  | -0.394     | -0.394     |
| C2   | 0.254  | 0.219  | -0.036 | -0.132 | -0.167 | -0.035 | -0.124 | -0.151 | -0.027 | -0.386     | -0.378     |
| C3   | -0.219 | -0.132 | 0.087  | 0.430  | 0.511  | 0.080  | 0.417  | 0.500  | 0.083  | 0.649      | 0.636      |
| N3   | -0.541 | -0.595 | -0.054 | -0.584 | -0.587 | -0.003 | -0.581 | -0.585 | -0.003 | -0.043     | -0.040     |
| C4   | -0.551 | -0.530 | 0.021  | -0.257 | -0.193 | 0.063  | -0.256 | -0.195 | 0.061  | 0.294      | 0.295      |
| C5   | -0.513 | -0.530 | -0.017 | -0.254 | -0.194 | 0.061  | -0.256 | -0.168 | 0.088  | 0.258      | 0.257      |
| C6   | -0.208 | -0.131 | 0.076  | 0.410  | 0.508  | 0.098  | 0.412  | 0.476  | 0.064  | 0.617      | 0.619      |
| N6   | -0.538 | -0.595 | -0.057 | -0.580 | -0.585 | -0.005 | -0.581 | -0.583 | -0.002 | -0.042     | -0.042     |
| C7   | 0.196  | 0.218  | 0.022  | -0.121 | -0.152 | -0.030 | -0.121 | -0.135 | -0.015 | -0.318     | -0.317     |
| C8   | -0.034 | 0.038  | 0.072  | -0.438 | -0.387 | 0.051  | -0.440 | -0.377 | 0.063  | -0.404     | -0.406     |
| C9   | 0.317  | 0.348  | 0.031  | 0.189  | 0.155  | -0.033 | 0.190  | 0.146  | -0.044 | -0.128     | -0.127     |
| N10  | -0.341 | -0.255 | 0.086  | -0.426 | -0.451 | -0.025 | -0.426 | -0.449 | -0.023 | -0.085     | -0.085     |
| C11  | 0.490  | 0.518  | 0.029  | 0.357  | 0.340  | -0.017 | 0.357  | 0.345  | -0.012 | -0.133     | -0.132     |
| C12  | -0.273 | -0.470 | -0.197 | -0.177 | -0.323 | -0.147 | -0.175 | -0.295 | -0.120 | 0.096      | 0.098      |
| C13  | -0.240 | -0.470 | -0.230 | -0.173 | -0.322 | -0.149 | -0.173 | -0.316 | -0.143 | 0.066      | 0.067      |
| C14  | 0.475  | 0.518  | 0.044  | 0.355  | 0.352  | -0.003 | 0.355  | 0.327  | -0.028 | -0.119     | -0.120     |

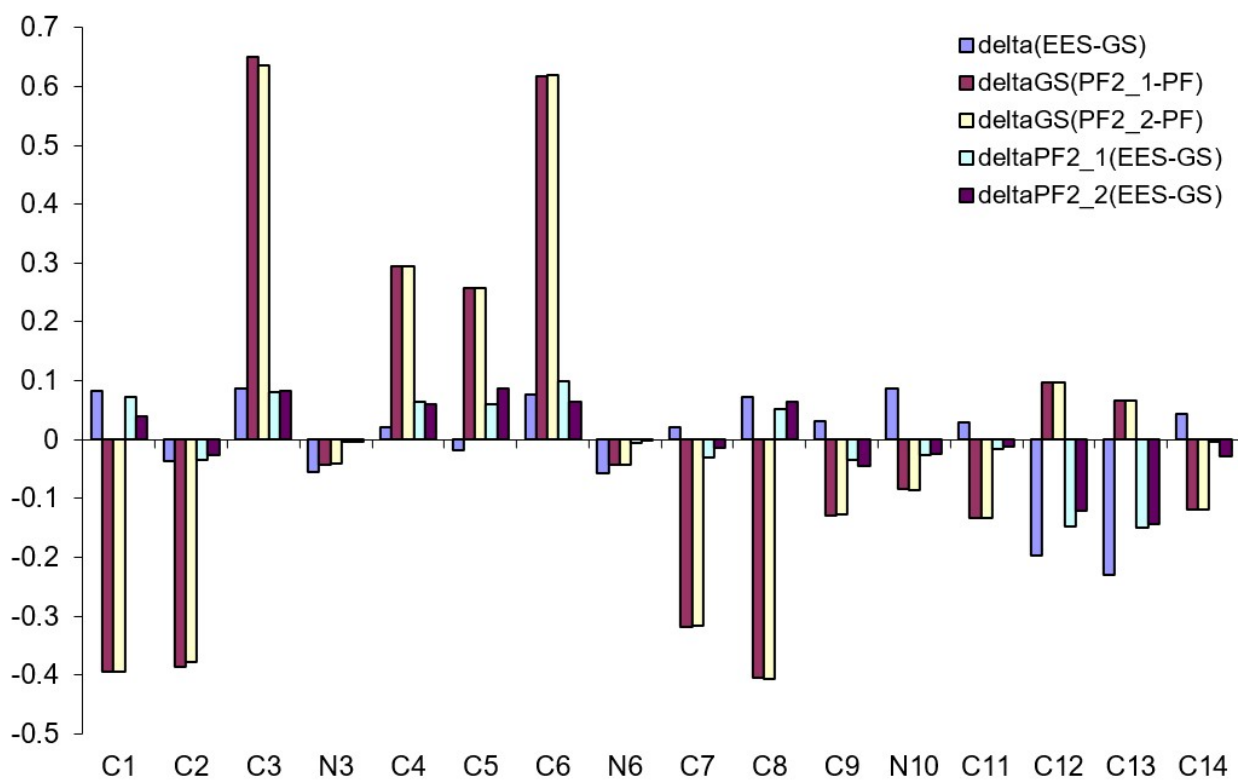

Fig. S29. Changes of NPA charges from Table S11



Table S12. NPA charges ( $e$ ) obtained through CAM-B3LYP functional with GD3 correction

| Atom | PF     |        |        | PF2 1  |        |        | PF2 2  |        |        | deltaGS    | deltaGS    |
|------|--------|--------|--------|--------|--------|--------|--------|--------|--------|------------|------------|
|      | GS     | EES    | delta  | GS     | EES    | delta  | GS     | EES    | delta  | (PF2 1-PF) | (PF2 2-PF) |
| C1   | -0.081 | -0.006 | 0.075  | -0.472 | -0.485 | -0.013 | -0.471 | -0.484 | -0.013 | -0.391     | -0.390     |
| C2   | 0.336  | 0.292  | -0.044 | -0.157 | -0.149 | 0.008  | -0.147 | -0.145 | 0.002  | -0.492     | -0.483     |
| C3   | -0.341 | -0.196 | 0.145  | 0.405  | 0.398  | -0.007 | 0.391  | 0.393  | 0.001  | 0.746      | 0.732      |
| N3   | -0.493 | -0.567 | -0.074 | -0.542 | -0.544 | -0.002 | -0.539 | -0.543 | -0.004 | -0.049     | -0.047     |
| C4   | -0.683 | -0.684 | -0.001 | -0.363 | -0.370 | -0.008 | -0.363 | -0.371 | -0.007 | 0.320      | 0.319      |
| C5   | -0.634 | -0.684 | -0.049 | -0.363 | -0.370 | -0.007 | -0.363 | -0.371 | -0.008 | 0.272      | 0.271      |
| C6   | -0.335 | -0.195 | 0.139  | 0.385  | 0.387  | 0.003  | 0.387  | 0.387  | 0.001  | 0.719      | 0.721      |
| N6   | -0.489 | -0.567 | -0.077 | -0.538 | -0.542 | -0.004 | -0.539 | -0.542 | -0.003 | -0.049     | -0.049     |
| C7   | 0.262  | 0.292  | 0.031  | -0.144 | -0.142 | 0.002  | -0.143 | -0.142 | 0.001  | -0.406     | -0.405     |
| C8   | -0.077 | -0.006 | 0.071  | -0.470 | -0.484 | -0.014 | -0.471 | -0.485 | -0.013 | -0.393     | -0.394     |
| C9   | 0.426  | 0.473  | 0.047  | 0.144  | 0.157  | 0.013  | 0.145  | 0.158  | 0.013  | -0.282     | -0.281     |
| N10  | -0.292 | -0.208 | 0.084  | -0.291 | -0.286 | 0.005  | -0.291 | -0.286 | 0.005  | 0.001      | 0.001      |
| C11  | 0.495  | 0.522  | 0.028  | 0.430  | 0.423  | -0.007 | 0.429  | 0.422  | -0.007 | -0.065     | -0.066     |
| C12  | -0.281 | -0.475 | -0.195 | -0.275 | -0.254 | 0.021  | -0.273 | -0.253 | 0.019  | 0.006      | 0.008      |
| C13  | -0.237 | -0.475 | -0.239 | -0.272 | -0.252 | 0.019  | -0.272 | -0.252 | 0.020  | -0.035     | -0.035     |
| C14  | 0.477  | 0.522  | 0.045  | 0.427  | 0.420  | -0.006 | 0.426  | 0.421  | -0.005 | -0.050     | -0.051     |

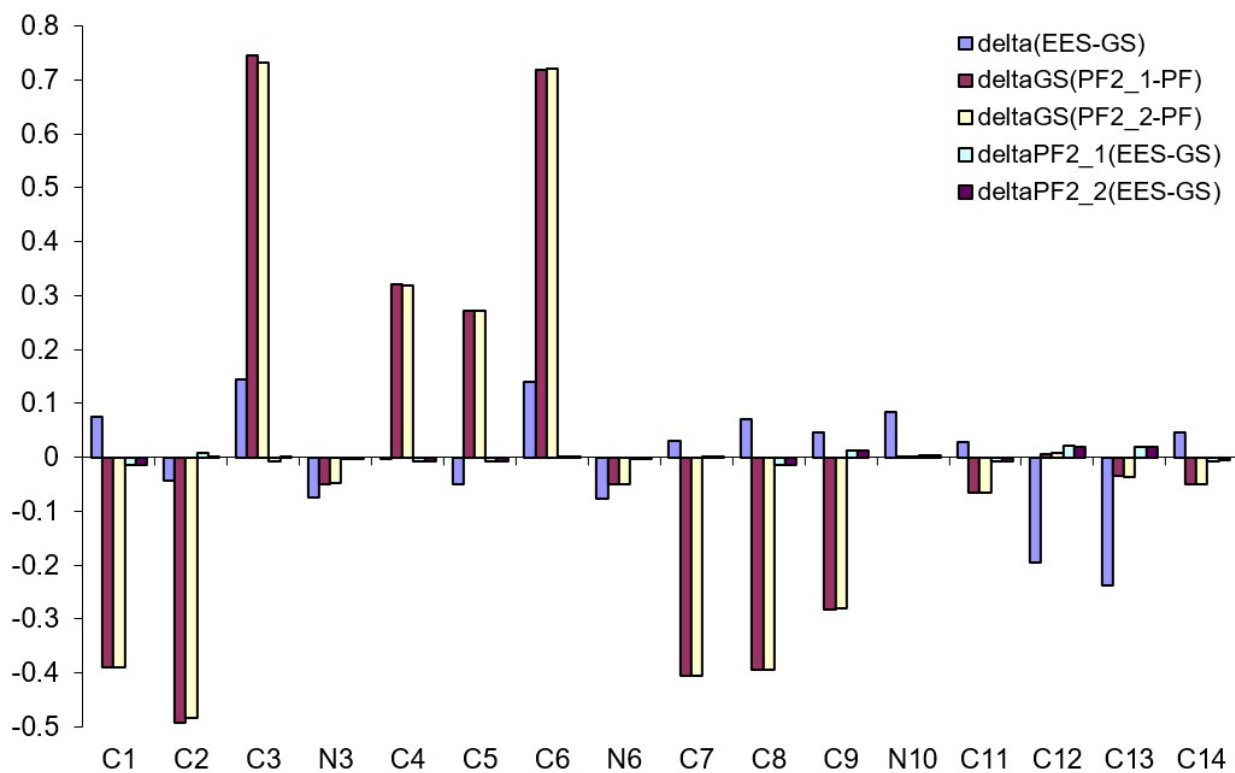

Fig. S30. Changes of NPA charges from Table S12

Table S13. NPA charges ( $e$ ) obtained through CAM-B3LYP functional with GD3+BJ correction

| Atom | PF     |        |        | PF2 1  |        |        | PF2 2  |        |        | deltaGS    | deltaGS    |
|------|--------|--------|--------|--------|--------|--------|--------|--------|--------|------------|------------|
|      | GS     | EES    | delta  | GS     | EES    | delta  | GS     | EES    | delta  | (PF2 1-PF) | (PF2 2-PF) |
| C1   | -0.081 | -0.006 | 0.075  | -0.472 | -0.460 | 0.012  | -0.471 | -0.460 | 0.011  | -0.391     | -0.390     |
| C2   | 0.336  | 0.293  | -0.043 | -0.157 | -0.150 | 0.007  | -0.147 | -0.142 | 0.005  | -0.492     | -0.483     |
| C3   | -0.341 | -0.198 | 0.143  | 0.405  | 0.390  | -0.015 | 0.391  | 0.380  | -0.011 | 0.746      | 0.732      |
| N3   | -0.493 | -0.566 | -0.074 | -0.542 | -0.544 | -0.001 | -0.539 | -0.542 | -0.002 | -0.049     | -0.047     |
| C4   | -0.683 | -0.683 | 0.000  | -0.363 | -0.362 | 0.001  | -0.363 | -0.362 | 0.001  | 0.320      | 0.319      |
| C5   | -0.634 | -0.683 | -0.049 | -0.363 | -0.362 | 0.000  | -0.363 | -0.362 | 0.001  | 0.272      | 0.271      |
| C6   | -0.335 | -0.198 | 0.136  | 0.385  | 0.376  | -0.009 | 0.387  | 0.377  | -0.010 | 0.719      | 0.721      |
| N6   | -0.489 | -0.566 | -0.077 | -0.538 | -0.541 | -0.003 | -0.539 | -0.541 | -0.002 | -0.049     | -0.049     |
| C7   | 0.262  | 0.293  | 0.031  | -0.144 | -0.139 | 0.005  | -0.143 | -0.138 | 0.005  | -0.406     | -0.405     |
| C8   | -0.077 | -0.006 | 0.071  | -0.470 | -0.459 | 0.011  | -0.471 | -0.460 | 0.011  | -0.393     | -0.394     |
| C9   | 0.426  | 0.474  | 0.048  | 0.144  | 0.127  | -0.017 | 0.145  | 0.128  | -0.017 | -0.282     | -0.281     |
| N10  | -0.292 | -0.207 | 0.084  | -0.291 | -0.285 | 0.006  | -0.291 | -0.285 | 0.006  | 0.001      | 0.001      |
| C11  | 0.495  | 0.524  | 0.029  | 0.430  | 0.408  | -0.022 | 0.429  | 0.407  | -0.022 | -0.065     | -0.066     |
| C12  | -0.281 | -0.476 | -0.195 | -0.275 | -0.250 | 0.025  | -0.273 | -0.249 | 0.024  | 0.006      | 0.008      |
| C13  | -0.237 | -0.475 | -0.239 | -0.272 | -0.249 | 0.023  | -0.272 | -0.250 | 0.022  | -0.035     | -0.035     |
| C14  | 0.477  | 0.524  | 0.047  | 0.427  | 0.406  | -0.021 | 0.426  | 0.406  | -0.020 | -0.050     | -0.051     |

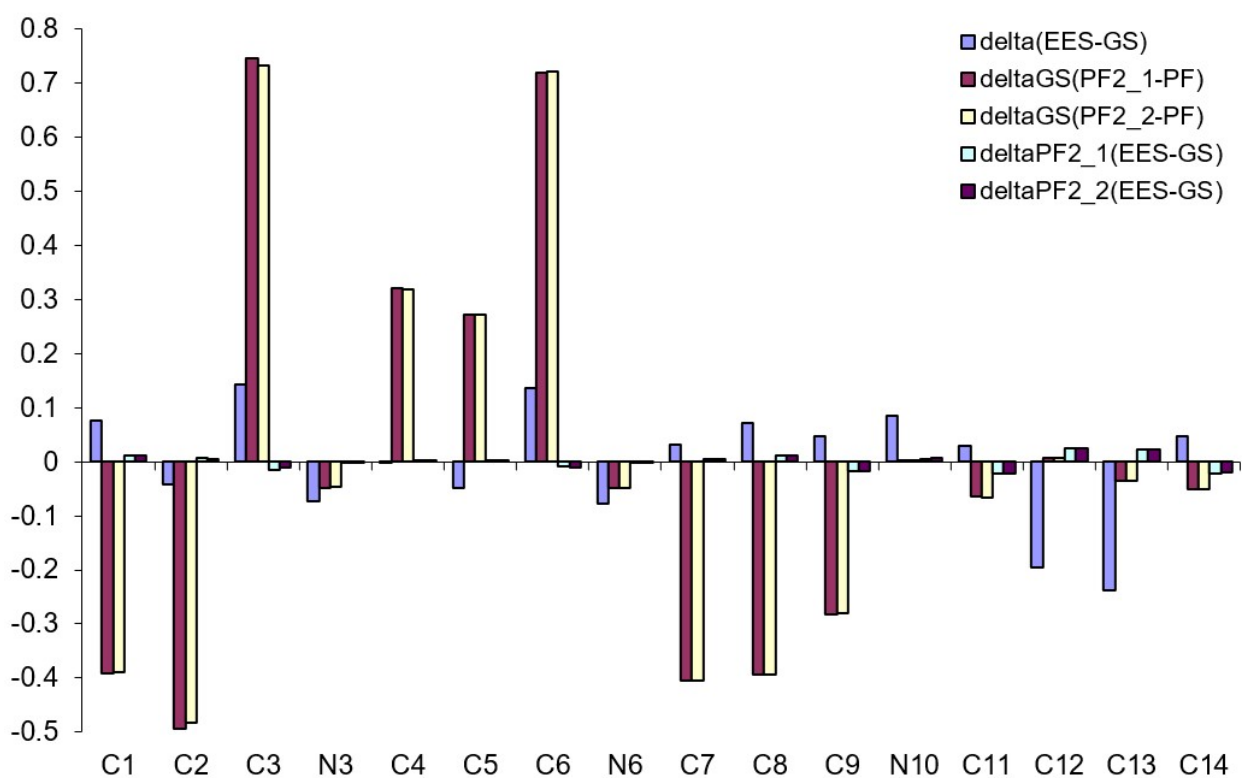

Fig. S31. Changes of NPA charges from Table S13

Table S14. NPA charges ( $e$ ) obtained through M05 functional with GD3 correction

| Atom | PF     |        |        | PF2 1  |        |        | PF2 2  |        |        | deltaGS    | deltaGS    |
|------|--------|--------|--------|--------|--------|--------|--------|--------|--------|------------|------------|
|      | GS     | EES    | delta  | GS     | EES    | delta  | GS     | EES    | delta  | (PF2 1-PF) | (PF2 2-PF) |
| C1   | -0.048 | 0.027  | 0.075  | -0.514 | -0.089 | 0.425  | -0.514 | -0.426 | 0.087  | -0.467     | -0.466     |
| C2   | 0.490  | 0.411  | -0.079 | -0.126 | 0.152  | 0.278  | -0.117 | -0.098 | 0.019  | -0.616     | -0.607     |
| C3   | -0.488 | -0.322 | 0.166  | 0.528  | -0.166 | -0.694 | 0.513  | 0.347  | -0.166 | 1.016      | 1.001      |
| N3   | -0.480 | -0.530 | -0.050 | -0.551 | -0.408 | 0.143  | -0.548 | -0.508 | 0.040  | -0.071     | -0.068     |
| C4   | -0.766 | -0.738 | 0.028  | -0.431 | -0.226 | 0.205  | -0.431 | -0.315 | 0.116  | 0.335      | 0.335      |
| C5   | -0.717 | -0.738 | -0.022 | -0.430 | -0.313 | 0.117  | -0.431 | -0.262 | 0.169  | 0.286      | 0.286      |
| C6   | -0.481 | -0.321 | 0.160  | 0.507  | 0.192  | -0.315 | 0.509  | -0.096 | -0.605 | 0.988      | 0.990      |
| N6   | -0.477 | -0.530 | -0.054 | -0.547 | -0.469 | 0.078  | -0.548 | -0.482 | 0.065  | -0.070     | -0.071     |
| C7   | 0.403  | 0.411  | 0.008  | -0.114 | 0.061  | 0.174  | -0.113 | -0.004 | 0.109  | -0.517     | -0.516     |
| C8   | -0.045 | 0.027  | 0.072  | -0.512 | -0.448 | 0.065  | -0.514 | -0.036 | 0.478  | -0.467     | -0.469     |
| C9   | 0.393  | 0.446  | 0.053  | -0.003 | -0.321 | -0.318 | -0.002 | -0.440 | -0.438 | -0.396     | -0.395     |
| N10  | -0.250 | -0.168 | 0.081  | -0.326 | -0.151 | 0.176  | -0.327 | -0.194 | 0.133  | -0.077     | -0.077     |
| C11  | 0.465  | 0.465  | -0.001 | 0.317  | -0.015 | -0.332 | 0.317  | 0.035  | -0.282 | -0.148     | -0.148     |
| C12  | -0.319 | -0.519 | -0.200 | -0.223 | -0.159 | 0.064  | -0.221 | -0.192 | 0.030  | 0.096      | 0.098      |
| C13  | -0.256 | -0.519 | -0.263 | -0.220 | -0.194 | 0.026  | -0.220 | 0.040  | 0.260  | 0.036      | 0.036      |
| C14  | 0.451  | 0.465  | 0.014  | 0.315  | 0.136  | -0.178 | 0.314  | 0.221  | -0.093 | -0.136     | -0.137     |

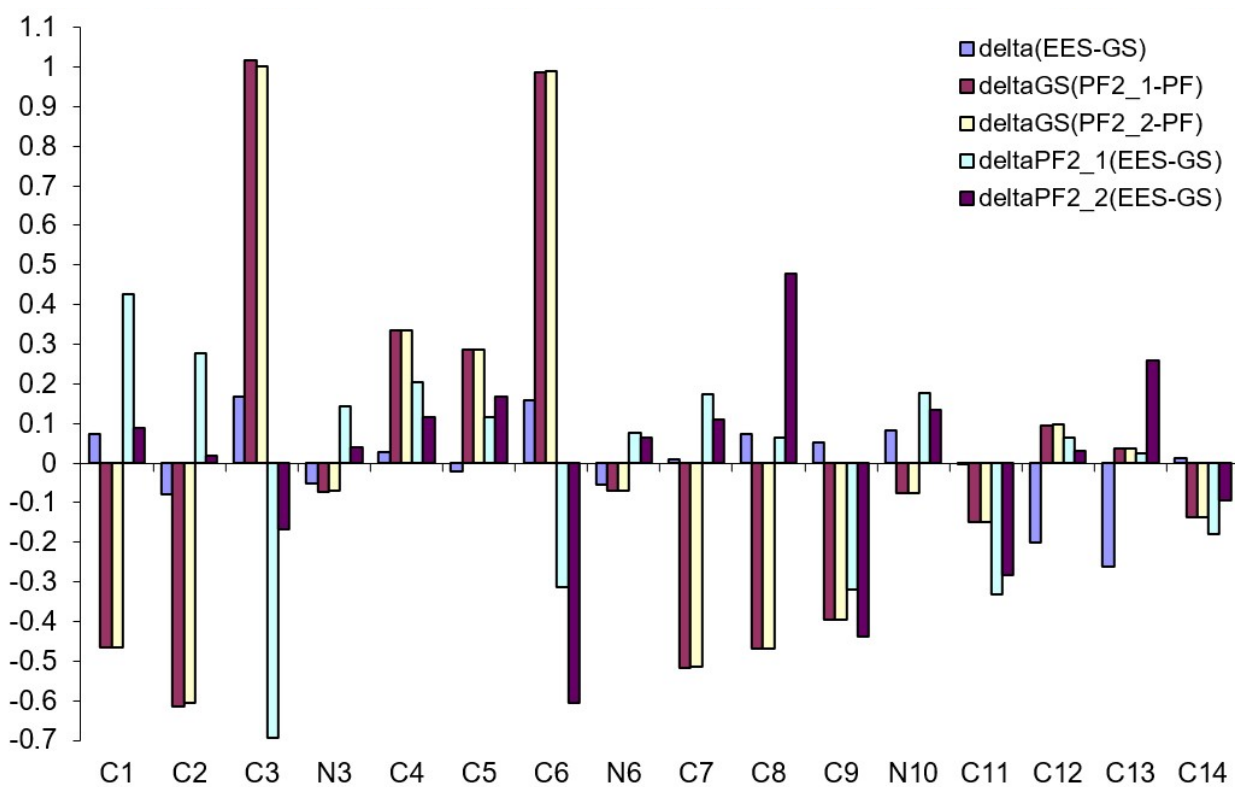

Fig. S32. Changes of NPA charges from Table S14

Table S15. NPA charges ( $e$ ) obtained through M052X functional

| Atom | PF     |        |        | PF2 1  |        |        | PF2 2  |        |        | deltaGS<br>(PF2 1-PF) | deltaGS<br>(PF2 2-PF) |
|------|--------|--------|--------|--------|--------|--------|--------|--------|--------|-----------------------|-----------------------|
|      | GS     | EES    | delta  | GS     | EES    | delta  | GS     | EES    | delta  |                       |                       |
| C1   | -0.118 | -0.050 | 0.068  | -0.515 | -0.512 | 0.003  | -0.515 | -0.438 | 0.076  | -0.398                | -0.397                |
| C2   | 0.357  | 0.307  | -0.050 | -0.175 | -0.152 | 0.023  | -0.165 | -0.066 | 0.098  | -0.532                | -0.522                |
| C3   | -0.485 | -0.321 | 0.163  | 0.356  | 0.354  | -0.003 | 0.342  | 0.311  | -0.031 | 0.841                 | 0.827                 |
| N3   | -0.473 | -0.545 | -0.072 | -0.529 | -0.506 | 0.022  | -0.526 | -0.502 | 0.024  | -0.056                | -0.053                |
| C4   | -0.678 | -0.686 | -0.009 | -0.343 | -0.334 | 0.009  | -0.344 | -0.339 | 0.005  | 0.335                 | 0.334                 |
| C5   | -0.623 | -0.686 | -0.063 | -0.343 | -0.337 | 0.007  | -0.344 | -0.361 | -0.018 | 0.280                 | 0.280                 |
| C6   | -0.472 | -0.321 | 0.151  | 0.335  | 0.326  | -0.009 | 0.337  | 0.442  | 0.105  | 0.807                 | 0.809                 |
| N6   | -0.470 | -0.545 | -0.075 | -0.525 | -0.508 | 0.016  | -0.525 | -0.520 | 0.005  | -0.055                | -0.056                |
| C7   | 0.273  | 0.307  | 0.034  | -0.162 | -0.112 | 0.050  | -0.161 | -0.211 | -0.050 | -0.434                | -0.433                |
| C8   | -0.111 | -0.050 | 0.061  | -0.514 | -0.435 | 0.079  | -0.515 | -0.508 | 0.007  | -0.402                | -0.404                |
| C9   | 0.542  | 0.592  | 0.049  | 0.222  | 0.152  | -0.070 | 0.223  | 0.156  | -0.067 | -0.321                | -0.320                |
| N10  | -0.232 | -0.150 | 0.083  | -0.244 | -0.285 | -0.041 | -0.245 | -0.282 | -0.037 | -0.012                | -0.012                |
| C11  | 0.563  | 0.611  | 0.048  | 0.469  | 0.375  | -0.094 | 0.468  | 0.307  | -0.161 | -0.094                | -0.095                |
| C12  | -0.350 | -0.563 | -0.213 | -0.344 | -0.276 | 0.067  | -0.342 | -0.282 | 0.060  | 0.006                 | 0.009                 |
| C13  | -0.309 | -0.563 | -0.254 | -0.340 | -0.248 | 0.092  | -0.340 | -0.276 | 0.064  | -0.031                | -0.031                |
| C14  | 0.551  | 0.611  | 0.060  | 0.466  | 0.308  | -0.158 | 0.466  | 0.377  | -0.088 | -0.086                | -0.086                |

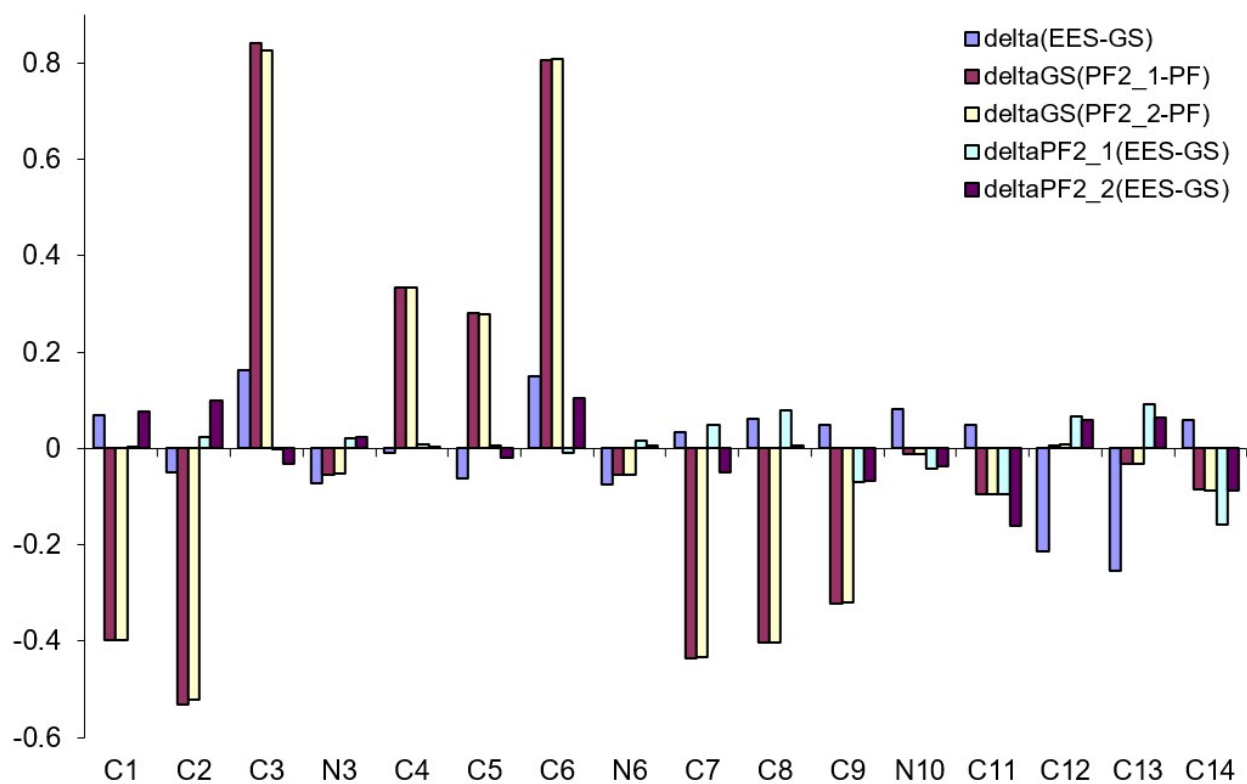

Fig. S33. Changes of NPA charges from Table S15



Table S16. NPA charges ( $e$ ) obtained through M06 functional

| Atom | PF     |        |        | PF2 1  |        |        | PF2 2  |        |        | deltaGS<br>(PF2 1-PF) | deltaGS<br>(PF2 2-PF) |
|------|--------|--------|--------|--------|--------|--------|--------|--------|--------|-----------------------|-----------------------|
|      | GS     | EES    | delta  | GS     | EES    | delta  | GS     | EES    | delta  |                       |                       |
| C1   | 0.001  | 0.052  | 0.050  | -0.395 | -0.437 | -0.043 | -0.394 | -0.437 | -0.043 | -0.396                | -0.395                |
| C2   | 0.450  | 0.428  | -0.022 | 0.065  | 0.062  | -0.003 | 0.075  | 0.067  | -0.008 | -0.385                | -0.375                |
| C3   | -0.496 | -0.368 | 0.128  | 0.101  | 0.118  | 0.017  | 0.088  | 0.111  | 0.023  | 0.598                 | 0.584                 |
| N3   | -0.468 | -0.543 | -0.075 | -0.479 | -0.483 | -0.004 | -0.476 | -0.481 | -0.006 | -0.011                | -0.007                |
| C4   | -0.430 | -0.477 | -0.047 | -0.080 | -0.105 | -0.025 | -0.081 | -0.105 | -0.024 | 0.350                 | 0.349                 |
| C5   | -0.387 | -0.477 | -0.090 | -0.080 | -0.105 | -0.025 | -0.081 | -0.106 | -0.025 | 0.307                 | 0.306                 |
| C6   | -0.486 | -0.367 | 0.118  | 0.082  | 0.109  | 0.027  | 0.083  | 0.108  | 0.025  | 0.567                 | 0.569                 |
| N6   | -0.465 | -0.544 | -0.078 | -0.475 | -0.481 | -0.006 | -0.475 | -0.481 | -0.006 | -0.009                | -0.010                |
| C7   | 0.379  | 0.428  | 0.048  | 0.078  | 0.069  | -0.009 | 0.079  | 0.071  | -0.008 | -0.301                | -0.301                |
| C8   | 0.007  | 0.051  | 0.045  | -0.393 | -0.437 | -0.044 | -0.395 | -0.438 | -0.043 | -0.400                | -0.401                |
| C9   | 0.233  | 0.348  | 0.115  | -0.053 | -0.006 | 0.047  | -0.052 | -0.006 | 0.046  | -0.286                | -0.285                |
| N10  | -0.253 | -0.171 | 0.083  | -0.244 | -0.247 | -0.003 | -0.244 | -0.247 | -0.003 | 0.009                 | 0.009                 |
| C11  | 0.423  | 0.469  | 0.046  | 0.309  | 0.338  | 0.028  | 0.308  | 0.337  | 0.029  | -0.114                | -0.115                |
| C12  | -0.346 | -0.545 | -0.198 | -0.305 | -0.297 | 0.008  | -0.303 | -0.296 | 0.007  | 0.041                 | 0.043                 |
| C13  | -0.311 | -0.544 | -0.234 | -0.302 | -0.296 | 0.005  | -0.301 | -0.295 | 0.006  | 0.009                 | 0.009                 |
| C14  | 0.407  | 0.469  | 0.063  | 0.306  | 0.336  | 0.031  | 0.305  | 0.336  | 0.031  | -0.101                | -0.101                |

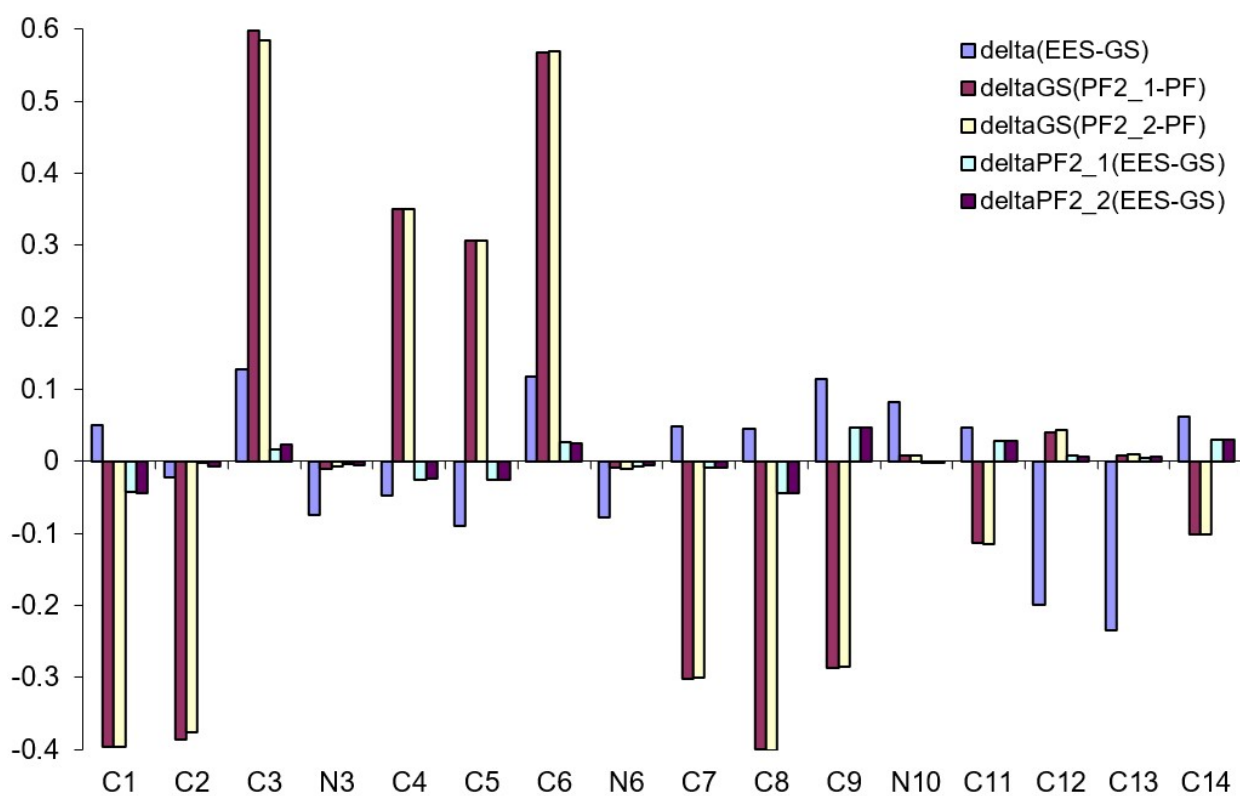

Fig. S34. Changes of NPA charges from Table S16

Table S17. NPA charges ( $e$ ) obtained through M062X functional

| Atom | PF     |        |        | PF2 1  |        |        | PF2 2  |        |        | deltaGS<br>(PF2 1-PF) | deltaGS<br>(PF2 2-PF) |
|------|--------|--------|--------|--------|--------|--------|--------|--------|--------|-----------------------|-----------------------|
|      | GS     | EES    | delta  | GS     | EES    | delta  | GS     | EES    | delta  |                       |                       |
| C1   | -0.062 | -0.006 | 0.056  | -0.457 | -0.507 | -0.050 | -0.456 | -0.506 | -0.050 | -0.395                | -0.394                |
| C2   | 0.321  | 0.270  | -0.051 | -0.192 | -0.273 | -0.081 | -0.182 | -0.264 | -0.082 | -0.513                | -0.503                |
| C3   | -0.413 | -0.242 | 0.171  | 0.362  | 0.494  | 0.131  | 0.347  | 0.478  | 0.131  | 0.775                 | 0.760                 |
| N3   | -0.511 | -0.587 | -0.076 | -0.556 | -0.572 | -0.016 | -0.552 | -0.569 | -0.017 | -0.045                | -0.041                |
| C4   | -0.607 | -0.630 | -0.023 | -0.291 | -0.336 | -0.045 | -0.291 | -0.334 | -0.043 | 0.316                 | 0.316                 |
| C5   | -0.557 | -0.630 | -0.073 | -0.290 | -0.333 | -0.043 | -0.291 | -0.334 | -0.042 | 0.267                 | 0.266                 |
| C6   | -0.401 | -0.242 | 0.160  | 0.339  | 0.471  | 0.132  | 0.341  | 0.467  | 0.127  | 0.740                 | 0.742                 |
| N6   | -0.507 | -0.587 | -0.080 | -0.550 | -0.568 | -0.017 | -0.551 | -0.567 | -0.016 | -0.043                | -0.044                |
| C7   | 0.245  | 0.270  | 0.025  | -0.179 | -0.262 | -0.083 | -0.178 | -0.257 | -0.079 | -0.424                | -0.423                |
| C8   | -0.059 | -0.007 | 0.052  | -0.455 | -0.507 | -0.052 | -0.457 | -0.508 | -0.052 | -0.396                | -0.398                |
| C9   | 0.380  | 0.440  | 0.060  | 0.109  | 0.164  | 0.055  | 0.110  | 0.165  | 0.055  | -0.271                | -0.270                |
| N10  | -0.296 | -0.212 | 0.084  | -0.336 | -0.379 | -0.043 | -0.336 | -0.379 | -0.043 | -0.040                | -0.040                |
| C11  | 0.461  | 0.501  | 0.040  | 0.372  | 0.349  | -0.022 | 0.371  | 0.349  | -0.022 | -0.089                | -0.090                |
| C12  | -0.318 | -0.515 | -0.197 | -0.276 | -0.204 | 0.071  | -0.274 | -0.202 | 0.072  | 0.042                 | 0.044                 |
| C13  | -0.285 | -0.514 | -0.229 | -0.272 | -0.198 | 0.074  | -0.272 | -0.198 | 0.074  | 0.014                 | 0.014                 |
| C14  | 0.450  | 0.501  | 0.051  | 0.369  | 0.348  | -0.021 | 0.369  | 0.348  | -0.021 | -0.081                | -0.081                |

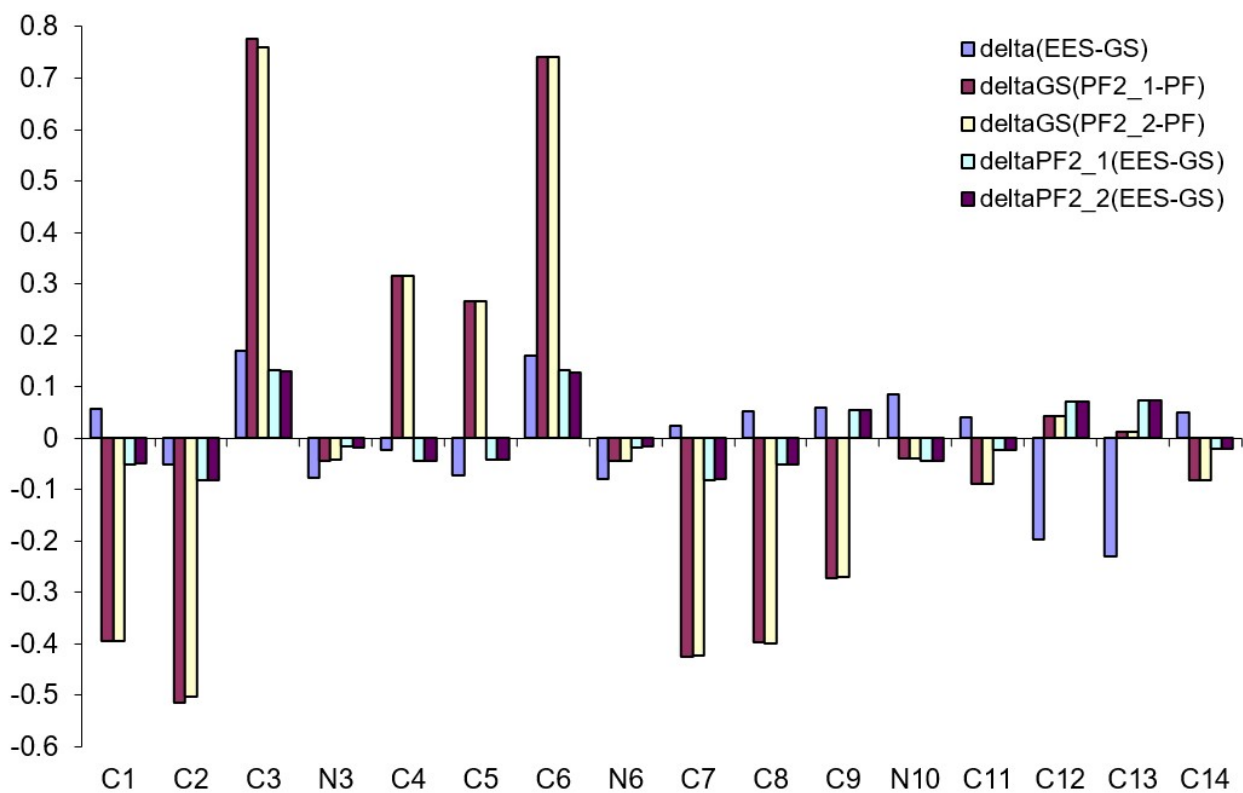

Fig. S35. Changes of NPA charges from Table S17

Table S18. NPA charges ( $e$ ) obtained through M06HF functional

| Atom | PF     |        |        | PF2 1  |        |        | PF2 2  |        |        | deltaGS<br>(PF2 1-PF) | deltaGS<br>(PF2 2-PF) |
|------|--------|--------|--------|--------|--------|--------|--------|--------|--------|-----------------------|-----------------------|
|      | GS     | EES    | delta  | GS     | EES    | delta  | GS     | EES    | delta  |                       |                       |
| C1   | -0.079 | 0.028  | 0.106  | -0.546 | -0.595 | -0.049 | -0.545 | -0.594 | -0.049 | -0.467                | -0.466                |
| C2   | 0.646  | 0.460  | -0.186 | -0.227 | -0.324 | -0.097 | -0.214 | -0.319 | -0.105 | -0.873                | -0.860                |
| C3   | -0.962 | -0.607 | 0.355  | 0.393  | 0.502  | 0.109  | 0.375  | 0.495  | 0.119  | 1.355                 | 1.337                 |
| N3   | -0.545 | -0.622 | -0.077 | -0.610 | -0.617 | -0.007 | -0.606 | -0.616 | -0.010 | -0.065                | -0.060                |
| C4   | -0.860 | -0.873 | -0.013 | -0.456 | -0.457 | -0.001 | -0.458 | -0.457 | 0.001  | 0.403                 | 0.402                 |
| C5   | -0.778 | -0.873 | -0.095 | -0.457 | -0.456 | 0.001  | -0.457 | -0.457 | 0.001  | 0.321                 | 0.321                 |
| C6   | -0.926 | -0.606 | 0.321  | 0.366  | 0.490  | 0.124  | 0.367  | 0.488  | 0.120  | 1.292                 | 1.294                 |
| N6   | -0.544 | -0.622 | -0.078 | -0.604 | -0.615 | -0.011 | -0.604 | -0.614 | -0.010 | -0.059                | -0.060                |
| C7   | 0.524  | 0.459  | -0.065 | -0.210 | -0.319 | -0.108 | -0.209 | -0.316 | -0.106 | -0.735                | -0.734                |
| C8   | -0.091 | 0.027  | 0.118  | -0.543 | -0.593 | -0.050 | -0.544 | -0.594 | -0.050 | -0.453                | -0.454                |
| C9   | 0.613  | 0.621  | 0.008  | 0.068  | 0.100  | 0.032  | 0.069  | 0.101  | 0.032  | -0.545                | -0.544                |
| N10  | -0.180 | -0.096 | 0.084  | -0.259 | -0.290 | -0.031 | -0.259 | -0.290 | -0.031 | -0.079                | -0.079                |
| C11  | 0.554  | 0.684  | 0.130  | 0.401  | 0.334  | -0.067 | 0.400  | 0.333  | -0.067 | -0.153                | -0.154                |
| C12  | -0.435 | -0.810 | -0.375 | -0.450 | -0.344 | 0.106  | -0.449 | -0.343 | 0.106  | -0.015                | -0.013                |
| C13  | -0.387 | -0.809 | -0.422 | -0.446 | -0.341 | 0.105  | -0.446 | -0.341 | 0.105  | -0.059                | -0.058                |
| C14  | 0.533  | 0.684  | 0.152  | 0.397  | 0.333  | -0.065 | 0.397  | 0.333  | -0.064 | -0.135                | -0.136                |

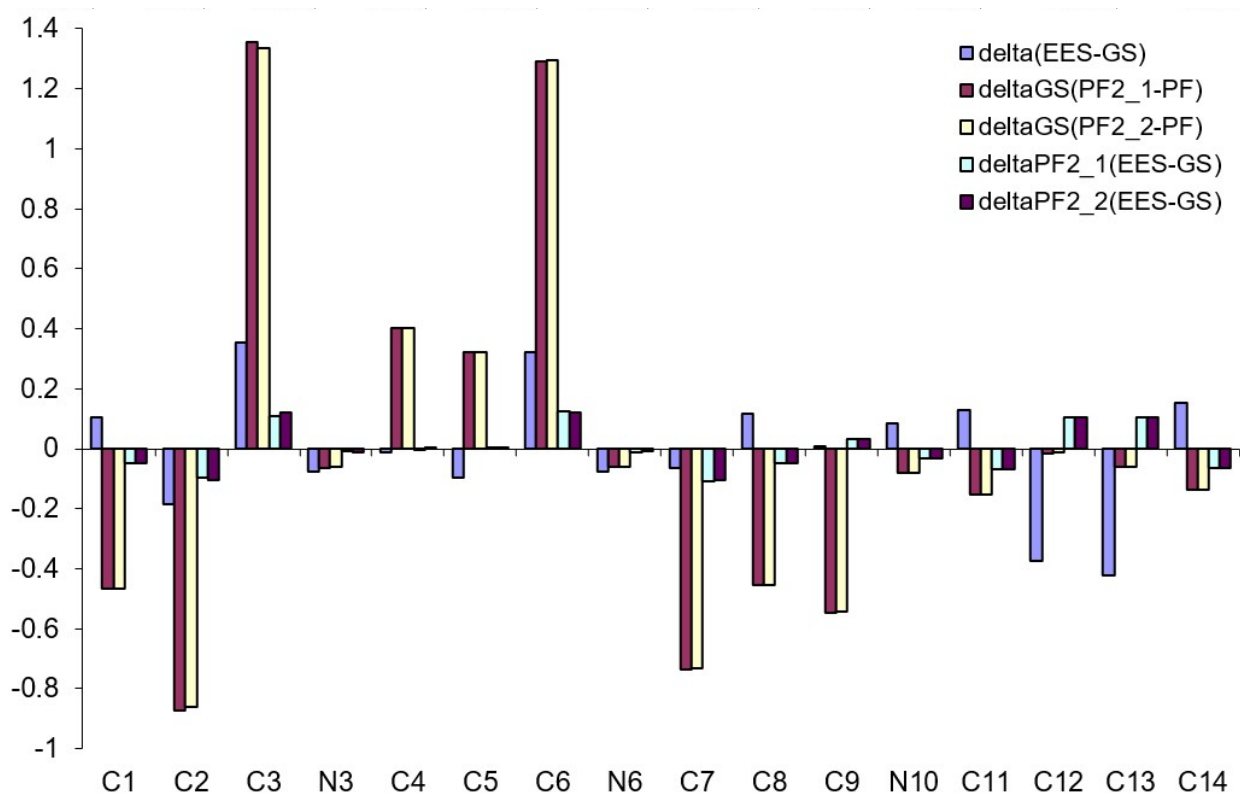

Fig. S36. Changes of NPA charges from Table S18

Table S19. NPA charges ( $e$ ) obtained through mPW2PLYP/GD3 functional

| Atom | PF     | PF2 1  | deltaGS<br>(PF2 1-PF) | PF2 2  | deltaGS<br>(PF2 2-PF) |
|------|--------|--------|-----------------------|--------|-----------------------|
|      | GS     | GS     |                       | GS     |                       |
| C1   | -0.080 | -0.525 | -0.444                | -0.525 | -0.445                |
| C2   | 0.376  | -0.161 | -0.537                | -0.159 | -0.535                |
| C3   | -0.517 | 0.368  | 0.885                 | 0.366  | 0.882                 |
| N3   | -0.486 | -0.560 | -0.074                | -0.559 | -0.074                |
| C4   | -0.601 | -0.304 | 0.297                 | -0.304 | 0.297                 |
| C5   | -0.555 | -0.301 | 0.254                 | -0.301 | 0.254                 |
| C6   | -0.516 | 0.342  | 0.858                 | 0.340  | 0.856                 |
| N6   | -0.481 | -0.554 | -0.074                | -0.554 | -0.073                |
| C7   | 0.296  | -0.146 | -0.442                | -0.145 | -0.441                |
| C8   | -0.073 | -0.524 | -0.451                | -0.524 | -0.451                |
| C9   | 0.424  | 0.117  | -0.307                | 0.117  | -0.307                |
| N10  | -0.327 | -0.377 | -0.050                | -0.377 | -0.050                |
| C11  | 0.512  | 0.333  | -0.178                | 0.333  | -0.178                |
| C12  | -0.301 | -0.120 | 0.181                 | -0.120 | 0.181                 |
| C13  | -0.251 | -0.112 | 0.139                 | -0.111 | 0.139                 |
| C14  | 0.502  | 0.327  | -0.175                | 0.327  | -0.175                |

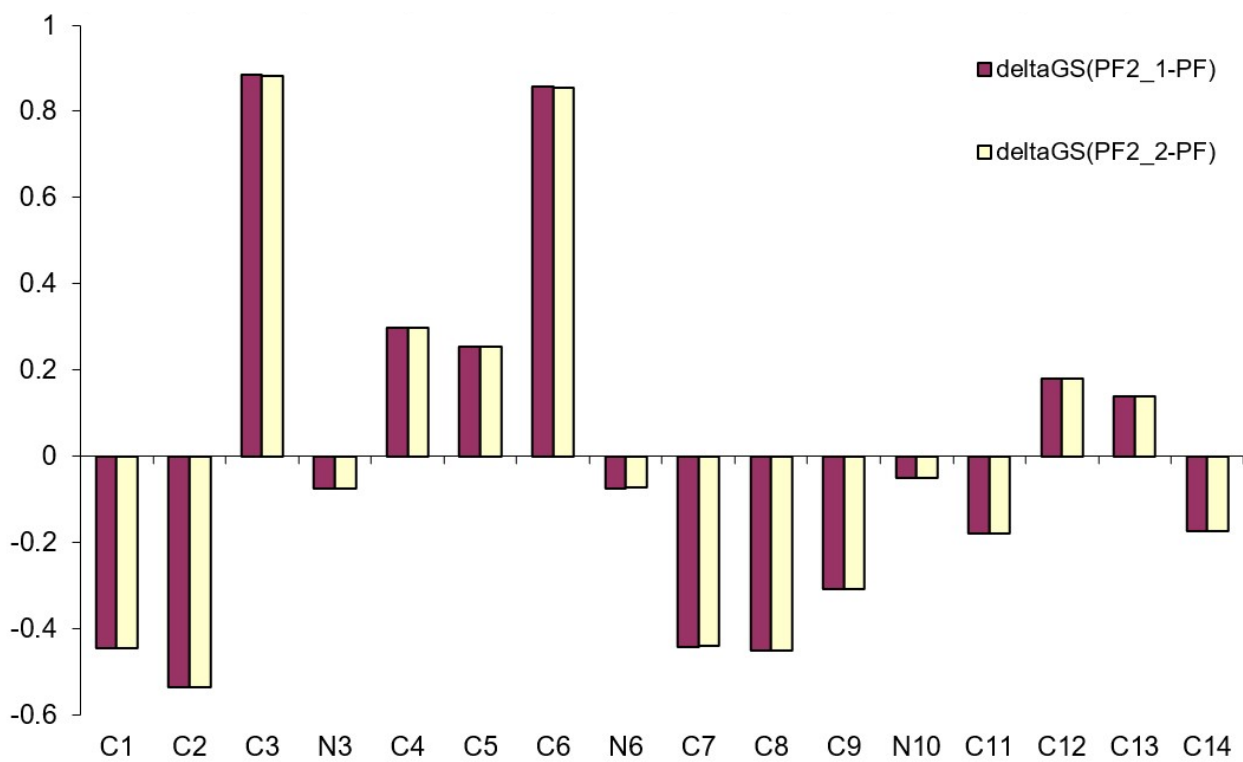

Fig. S37. Changes of NPA charges from Table S19

Table S20. NPA charges ( $e$ ) obtained through PBE0 functional with GD3 correction

| Atom | PF     |        |        | PF2 1  |        |        | PF2 2  |        |        | deltaGS    | deltaGS    |
|------|--------|--------|--------|--------|--------|--------|--------|--------|--------|------------|------------|
|      | GS     | EES    | delta  | GS     | EES    | delta  | GS     | EES    | delta  | (PF2 1-PF) | (PF2 2-PF) |
| C1   | -0.112 | -0.028 | 0.085  | -0.569 | -0.564 | 0.004  | -0.569 | -0.565 | 0.004  | -0.456     | -0.457     |
| C2   | 0.541  | 0.448  | -0.092 | -0.144 | -0.081 | 0.063  | -0.143 | -0.079 | 0.063  | -0.685     | -0.684     |
| C3   | -0.785 | -0.598 | 0.187  | 0.292  | 0.204  | -0.089 | 0.290  | 0.200  | -0.090 | 1.078      | 1.075      |
| N3   | -0.449 | -0.515 | -0.066 | -0.525 | -0.520 | 0.005  | -0.525 | -0.519 | 0.006  | -0.077     | -0.077     |
| C4   | -0.696 | -0.687 | 0.009  | -0.349 | -0.349 | 0.001  | -0.349 | -0.348 | 0.000  | 0.346      | 0.347      |
| C5   | -0.645 | -0.687 | -0.041 | -0.346 | -0.348 | -0.001 | -0.346 | -0.348 | -0.002 | 0.299      | 0.299      |
| C6   | -0.777 | -0.598 | 0.179  | 0.265  | 0.188  | -0.076 | 0.262  | 0.185  | -0.077 | 1.042      | 1.040      |
| N6   | -0.444 | -0.515 | -0.071 | -0.520 | -0.517 | 0.003  | -0.519 | -0.517 | 0.002  | -0.076     | -0.075     |
| C7   | 0.451  | 0.448  | -0.003 | -0.129 | -0.072 | 0.057  | -0.128 | -0.069 | 0.059  | -0.580     | -0.578     |
| C8   | -0.107 | -0.028 | 0.079  | -0.568 | -0.564 | 0.005  | -0.569 | -0.563 | 0.005  | -0.462     | -0.462     |
| C9   | 0.477  | 0.528  | 0.050  | 0.068  | 0.032  | -0.037 | 0.068  | 0.032  | -0.036 | -0.409     | -0.409     |
| N10  | -0.194 | -0.112 | 0.082  | -0.290 | -0.255 | 0.036  | -0.291 | -0.255 | 0.036  | -0.096     | -0.096     |
| C11  | 0.652  | 0.675  | 0.023  | 0.403  | 0.509  | 0.105  | 0.404  | 0.509  | 0.105  | -0.248     | -0.248     |
| C12  | -0.400 | -0.609 | -0.209 | -0.203 | -0.283 | -0.080 | -0.202 | -0.283 | -0.080 | 0.198      | 0.198      |
| C13  | -0.341 | -0.609 | -0.268 | -0.194 | -0.281 | -0.087 | -0.194 | -0.280 | -0.087 | 0.147      | 0.148      |
| C14  | 0.641  | 0.675  | 0.034  | 0.398  | 0.506  | 0.108  | 0.398  | 0.505  | 0.107  | -0.243     | -0.243     |

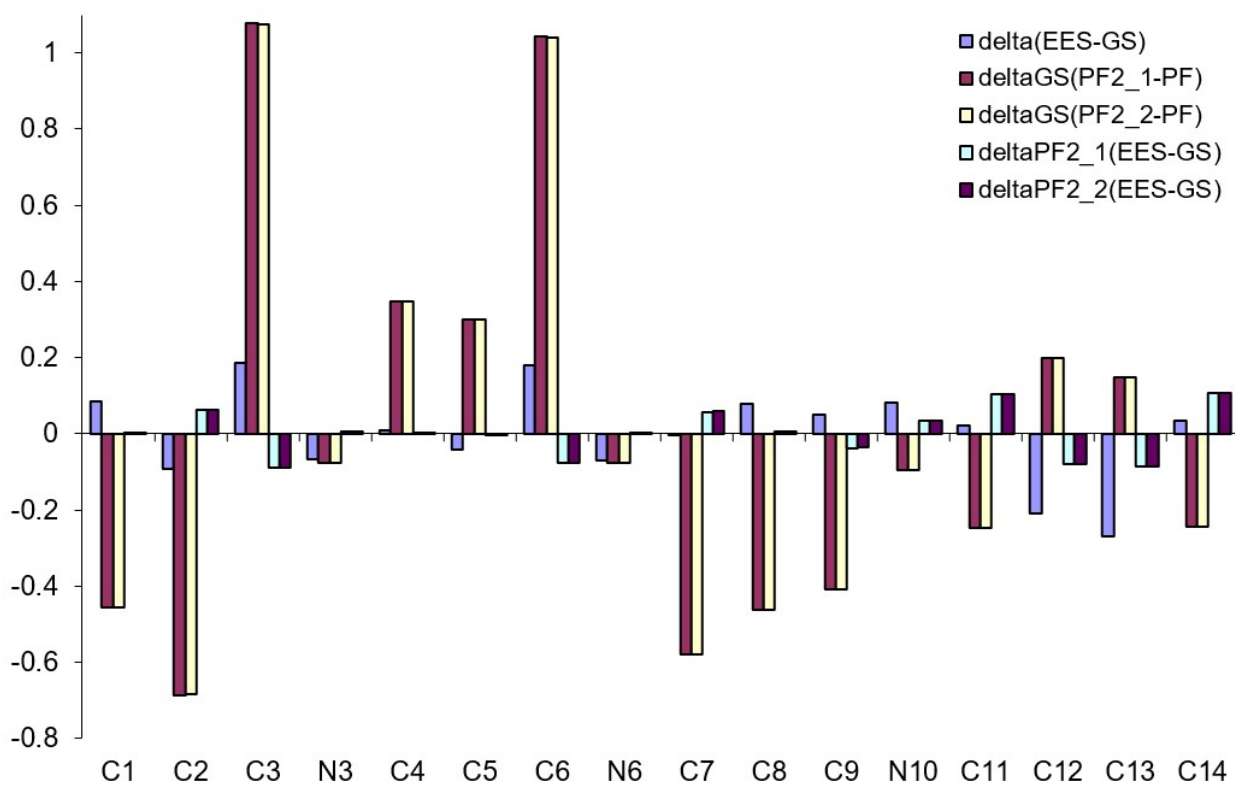

Fig. S38. Changes of NPA charges from Table S20



Table S21. NPA charges ( $e$ ) obtained through PBE0 functional with GD3+BJ correction

| Atom | PF     |        |        | PF2 1  |        |       | PF2 2  |        |       | deltaGS    | deltaGS    |
|------|--------|--------|--------|--------|--------|-------|--------|--------|-------|------------|------------|
|      | GS     | EES    | delta  | GS     | EES    | delta | GS     | EES    | delta | (PF2 1-PF) | (PF2 2-PF) |
| C1   | -0.112 | -0.028 | 0.084  | -0.564 | -0.564 | 0.000 | -0.563 | -0.563 | 0.000 | -0.452     | -0.451     |
| C2   | 0.541  | 0.450  | -0.091 | -0.094 | -0.094 | 0.000 | -0.083 | -0.083 | 0.000 | -0.634     | -0.624     |
| C3   | -0.785 | -0.602 | 0.184  | 0.220  | 0.220  | 0.000 | 0.205  | 0.205  | 0.000 | 1.005      | 0.990      |
| N3   | -0.449 | -0.515 | -0.066 | -0.523 | -0.523 | 0.000 | -0.519 | -0.519 | 0.000 | -0.074     | -0.071     |
| C4   | -0.696 | -0.687 | 0.009  | -0.344 | -0.344 | 0.000 | -0.345 | -0.345 | 0.000 | 0.352      | 0.351      |
| C5   | -0.645 | -0.687 | -0.041 | -0.344 | -0.344 | 0.000 | -0.345 | -0.345 | 0.000 | 0.301      | 0.301      |
| C6   | -0.777 | -0.601 | 0.176  | 0.198  | 0.198  | 0.000 | 0.200  | 0.200  | 0.000 | 0.975      | 0.977      |
| N6   | -0.444 | -0.515 | -0.071 | -0.518 | -0.518 | 0.000 | -0.519 | -0.519 | 0.000 | -0.075     | -0.075     |
| C7   | 0.451  | 0.449  | -0.002 | -0.080 | -0.080 | 0.000 | -0.079 | -0.079 | 0.000 | -0.531     | -0.530     |
| C8   | -0.107 | -0.029 | 0.078  | -0.562 | -0.562 | 0.000 | -0.564 | -0.564 | 0.000 | -0.455     | -0.457     |
| C9   | 0.477  | 0.530  | 0.052  | 0.024  | 0.024  | 0.000 | 0.025  | 0.025  | 0.000 | -0.453     | -0.452     |
| N10  | -0.194 | -0.112 | 0.082  | -0.258 | -0.258 | 0.000 | -0.258 | -0.258 | 0.000 | -0.064     | -0.064     |
| C11  | 0.652  | 0.676  | 0.025  | 0.524  | 0.524  | 0.000 | 0.523  | 0.523  | 0.000 | -0.128     | -0.129     |
| C12  | -0.400 | -0.609 | -0.209 | -0.300 | -0.300 | 0.000 | -0.298 | -0.298 | 0.000 | 0.100      | 0.103      |
| C13  | -0.341 | -0.609 | -0.267 | -0.297 | -0.297 | 0.000 | -0.297 | -0.297 | 0.000 | 0.045      | 0.045      |
| C14  | 0.641  | 0.676  | 0.035  | 0.520  | 0.520  | 0.000 | 0.520  | 0.520  | 0.000 | -0.121     | -0.121     |

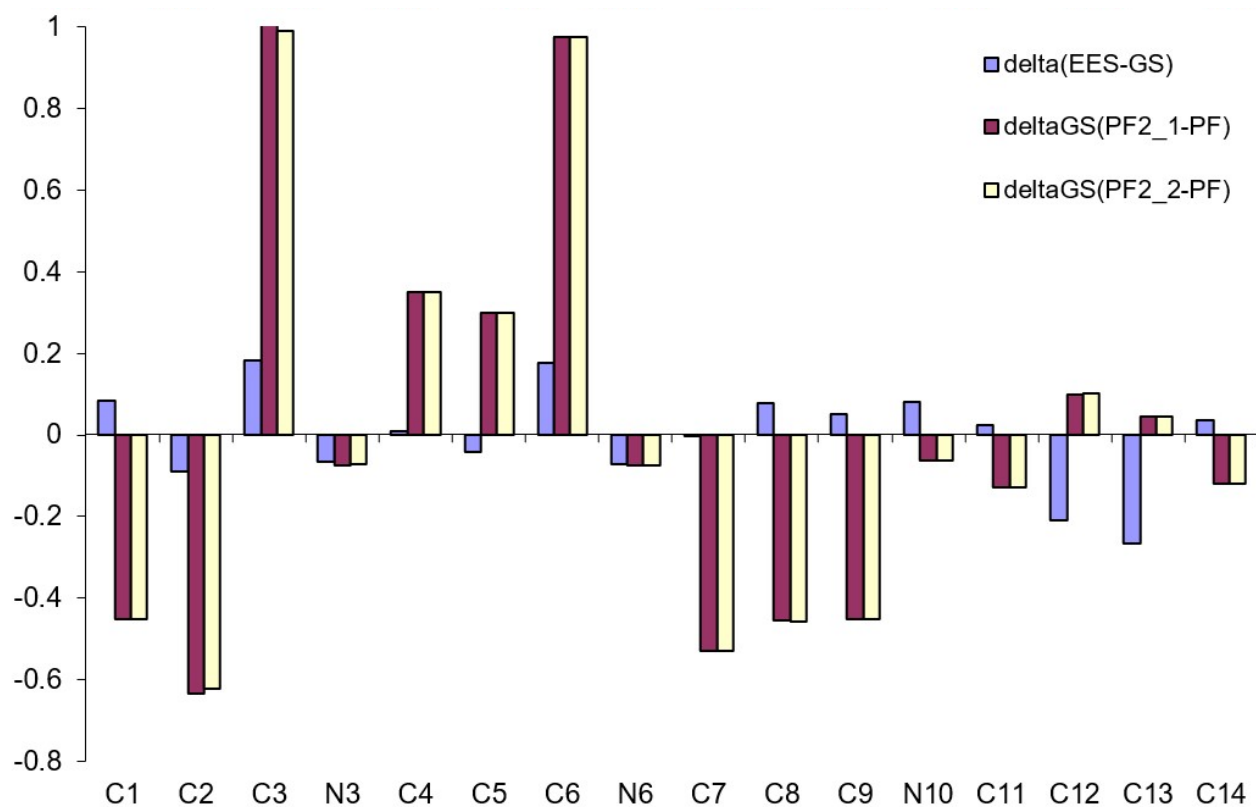

Fig. S39. Changes of NPA charges from Table S21

Table S22. NPA charges ( $e$ ) obtained through PW6B95 functional with GD3 correction

| Atom | PF     |        |        | PF2 1  |        |        | PF2 2  |        |        | deltaGS<br>(PF2 1-PF) | deltaGS<br>(PF2 2-PF) |
|------|--------|--------|--------|--------|--------|--------|--------|--------|--------|-----------------------|-----------------------|
|      | GS     | EES    | delta  | GS     | EES    | delta  | GS     | EES    | delta  |                       |                       |
| C1   | -0.107 | -0.034 | 0.074  | -0.519 | -0.526 | -0.007 | -0.518 | -0.525 | -0.007 | -0.411                | -0.410                |
| C2   | 0.447  | 0.375  | -0.072 | -0.151 | -0.142 | 0.009  | -0.141 | -0.137 | 0.004  | -0.599                | -0.588                |
| C3   | -0.590 | -0.404 | 0.186  | 0.314  | 0.328  | 0.014  | 0.299  | 0.319  | 0.020  | 0.904                 | 0.889                 |
| N3   | -0.462 | -0.530 | -0.068 | -0.523 | -0.529 | -0.007 | -0.519 | -0.528 | -0.008 | -0.061                | -0.058                |
| C4   | -0.705 | -0.715 | -0.010 | -0.361 | -0.379 | -0.017 | -0.362 | -0.378 | -0.016 | 0.344                 | 0.343                 |
| C5   | -0.653 | -0.715 | -0.063 | -0.361 | -0.377 | -0.015 | -0.362 | -0.376 | -0.014 | 0.292                 | 0.291                 |
| C6   | -0.582 | -0.403 | 0.178  | 0.290  | 0.314  | 0.023  | 0.292  | 0.314  | 0.022  | 0.872                 | 0.874                 |
| N6   | -0.458 | -0.530 | -0.073 | -0.518 | -0.527 | -0.009 | -0.519 | -0.527 | -0.008 | -0.060                | -0.061                |
| C7   | 0.361  | 0.375  | 0.014  | -0.138 | -0.135 | 0.003  | -0.137 | -0.134 | 0.003  | -0.499                | -0.498                |
| C8   | -0.102 | -0.034 | 0.067  | -0.516 | -0.524 | -0.007 | -0.518 | -0.525 | -0.007 | -0.415                | -0.416                |
| C9   | 0.491  | 0.561  | 0.070  | 0.124  | 0.135  | 0.011  | 0.126  | 0.135  | 0.010  | -0.367                | -0.365                |
| N10  | -0.224 | -0.149 | 0.075  | -0.277 | -0.278 | -0.001 | -0.277 | -0.278 | -0.001 | -0.053                | -0.053                |
| C11  | 0.612  | 0.646  | 0.035  | 0.518  | 0.465  | -0.053 | 0.518  | 0.464  | -0.054 | -0.094                | -0.094                |
| C12  | -0.363 | -0.568 | -0.205 | -0.305 | -0.246 | 0.060  | -0.303 | -0.243 | 0.060  | 0.058                 | 0.060                 |
| C13  | -0.311 | -0.568 | -0.257 | -0.302 | -0.243 | 0.059  | -0.302 | -0.243 | 0.059  | 0.009                 | 0.009                 |
| C14  | 0.601  | 0.646  | 0.045  | 0.516  | 0.463  | -0.053 | 0.515  | 0.463  | -0.053 | -0.085                | -0.086                |

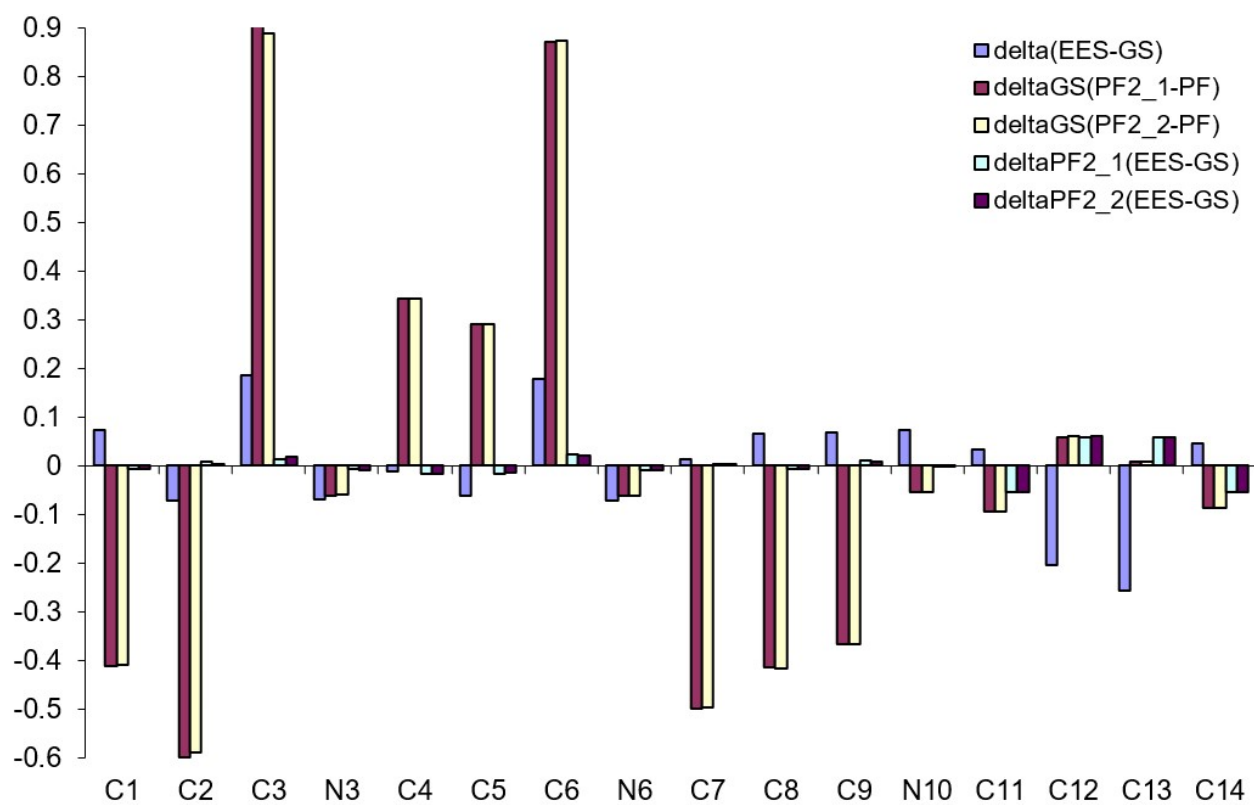

Fig. S40. Changes of NPA charges from Table S22

Table S23. NPA charges ( $e$ ) obtained through PW6B95 functional with GD3+BJ correction

| Atom | PF     |        |        | PF2 1  |        |        | PF2 2  |        |        | deltaGS    | deltaGS    |
|------|--------|--------|--------|--------|--------|--------|--------|--------|--------|------------|------------|
|      | GS     | EES    | delta  | GS     | EES    | delta  | GS     | EES    | delta  | (PF2 1-PF) | (PF2 2-PF) |
| C1   | -0.107 | -0.034 | 0.073  | -0.489 | -0.563 | -0.074 | -0.487 | -0.563 | -0.076 | -0.381     | -0.380     |
| C2   | 0.447  | 0.376  | -0.071 | -0.088 | -0.213 | -0.125 | -0.101 | -0.211 | -0.109 | -0.535     | -0.548     |
| C3   | -0.590 | -0.406 | 0.184  | 0.201  | 0.406  | 0.205  | 0.223  | 0.404  | 0.182  | 0.791      | 0.813      |
| N3   | -0.462 | -0.530 | -0.068 | -0.492 | -0.528 | -0.036 | -0.497 | -0.528 | -0.031 | -0.031     | -0.035     |
| C4   | -0.705 | -0.715 | -0.010 | -0.389 | -0.394 | -0.005 | -0.388 | -0.394 | -0.005 | 0.316      | 0.317      |
| C5   | -0.653 | -0.715 | -0.062 | -0.388 | -0.393 | -0.006 | -0.387 | -0.393 | -0.007 | 0.265      | 0.266      |
| C6   | -0.582 | -0.405 | 0.176  | 0.208  | 0.401  | 0.193  | 0.214  | 0.396  | 0.182  | 0.790      | 0.795      |
| N6   | -0.458 | -0.530 | -0.072 | -0.494 | -0.527 | -0.033 | -0.495 | -0.526 | -0.031 | -0.036     | -0.037     |
| C7   | 0.361  | 0.375  | 0.015  | -0.091 | -0.209 | -0.118 | -0.098 | -0.206 | -0.108 | -0.452     | -0.459     |
| C8   | -0.102 | -0.034 | 0.067  | -0.488 | -0.563 | -0.075 | -0.486 | -0.563 | -0.077 | -0.387     | -0.385     |
| C9   | 0.491  | 0.562  | 0.070  | 0.202  | 0.217  | 0.015  | 0.200  | 0.218  | 0.018  | -0.289     | -0.291     |
| N10  | -0.224 | -0.149 | 0.075  | -0.279 | -0.314 | -0.035 | -0.279 | -0.313 | -0.034 | -0.055     | -0.055     |
| C11  | 0.612  | 0.647  | 0.036  | 0.548  | 0.450  | -0.098 | 0.546  | 0.450  | -0.097 | -0.064     | -0.065     |
| C12  | -0.363 | -0.568 | -0.205 | -0.355 | -0.211 | 0.144  | -0.358 | -0.211 | 0.147  | 0.008      | 0.005      |
| C13  | -0.311 | -0.568 | -0.257 | -0.356 | -0.209 | 0.147  | -0.356 | -0.209 | 0.146  | -0.045     | -0.045     |
| C14  | 0.601  | 0.647  | 0.046  | 0.546  | 0.449  | -0.097 | 0.546  | 0.450  | -0.096 | -0.054     | -0.055     |

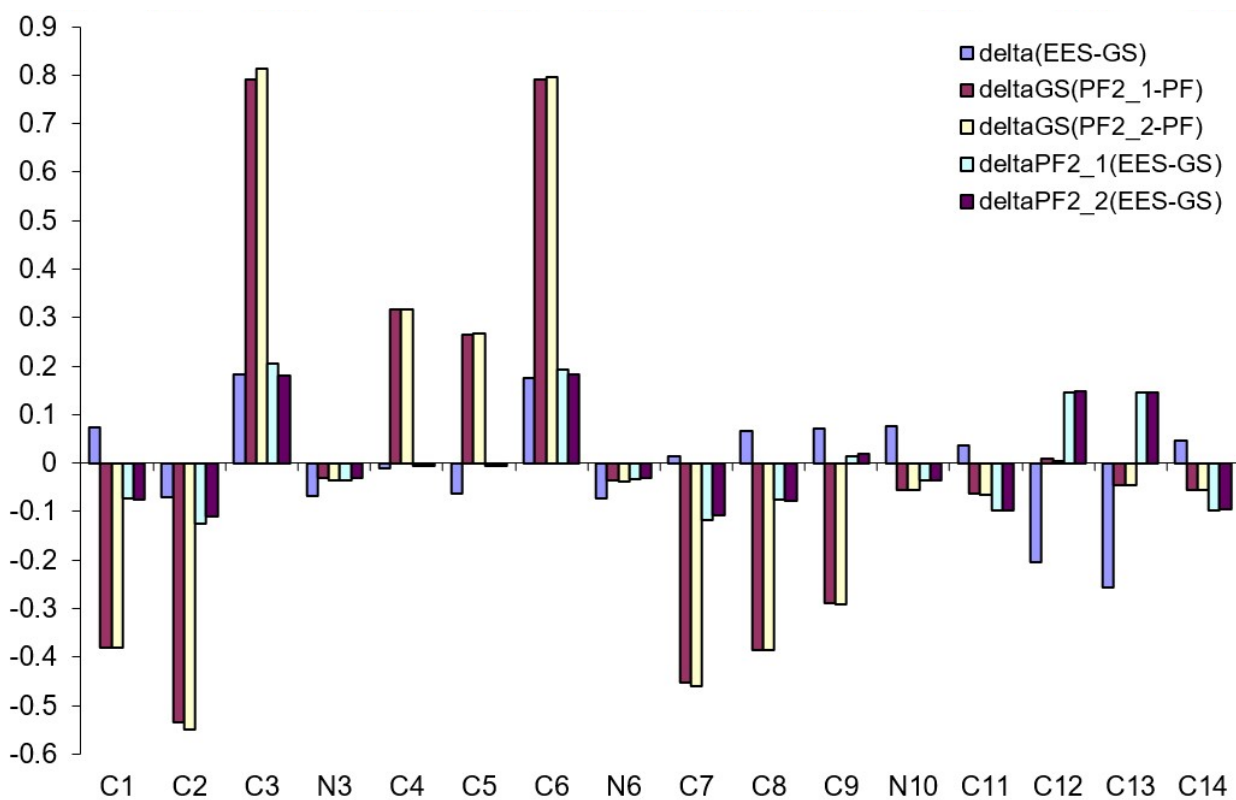

Fig. S41. Changes of NPA charges from Table S23

Table S24. NPA charges ( $e$ ) obtained through  $\omega$ B97XD functional

| Atom | PF     |        |        | PF2 1  |        |        | PF2 2  |        |        | deltaGS<br>(PF2 1-PF) | deltaGS<br>(PF2 2-PF) |
|------|--------|--------|--------|--------|--------|--------|--------|--------|--------|-----------------------|-----------------------|
|      | GS     | EES    | delta  | GS     | EES    | delta  | GS     | EES    | delta  |                       |                       |
| C1   | -0.018 | -0.017 | 0.001  | -0.438 | -0.350 | 0.088  | -0.438 | -0.350 | 0.088  | -0.420                | -0.420                |
| C2   | 0.355  | 0.350  | -0.005 | -0.094 | -0.063 | 0.031  | -0.099 | -0.063 | 0.036  | -0.450                | -0.455                |
| C3   | -0.407 | -0.385 | 0.022  | 0.202  | 0.074  | -0.128 | 0.209  | 0.074  | -0.135 | 0.609                 | 0.616                 |
| N3   | -0.550 | -0.565 | -0.015 | -0.529 | -0.507 | 0.022  | -0.530 | -0.507 | 0.023  | 0.021                 | 0.020                 |
| C4   | -0.590 | -0.594 | -0.005 | -0.275 | -0.242 | 0.033  | -0.275 | -0.242 | 0.033  | 0.315                 | 0.314                 |
| C5   | -0.588 | -0.594 | -0.006 | -0.273 | -0.278 | -0.005 | -0.273 | -0.278 | -0.005 | 0.316                 | 0.315                 |
| C6   | -0.410 | -0.385 | 0.025  | 0.188  | 0.283  | 0.095  | 0.196  | 0.284  | 0.088  | 0.598                 | 0.606                 |
| N6   | -0.548 | -0.565 | -0.017 | -0.526 | -0.523 | 0.004  | -0.528 | -0.523 | 0.005  | 0.022                 | 0.020                 |
| C7   | 0.356  | 0.350  | -0.006 | -0.088 | -0.013 | 0.075  | -0.094 | -0.014 | 0.080  | -0.445                | -0.450                |
| C8   | -0.018 | -0.017 | 0.001  | -0.439 | -0.400 | 0.038  | -0.439 | -0.400 | 0.039  | -0.421                | -0.422                |
| C9   | 0.414  | 0.413  | -0.001 | 0.016  | -0.054 | -0.070 | 0.015  | -0.054 | -0.070 | -0.398                | -0.398                |
| N10  | -0.194 | -0.194 | -0.001 | -0.323 | -0.314 | 0.010  | -0.323 | -0.314 | 0.009  | -0.130                | -0.129                |
| C11  | 0.525  | 0.521  | -0.004 | 0.290  | 0.163  | -0.127 | 0.291  | 0.163  | -0.128 | -0.235                | -0.234                |
| C12  | -0.470 | -0.468 | 0.002  | -0.120 | -0.043 | 0.077  | -0.122 | -0.043 | 0.079  | 0.349                 | 0.348                 |
| C13  | -0.470 | -0.468 | 0.002  | -0.116 | -0.248 | -0.132 | -0.117 | -0.248 | -0.131 | 0.354                 | 0.353                 |
| C14  | 0.525  | 0.521  | -0.004 | 0.289  | 0.268  | -0.021 | 0.290  | 0.268  | -0.022 | -0.236                | -0.235                |

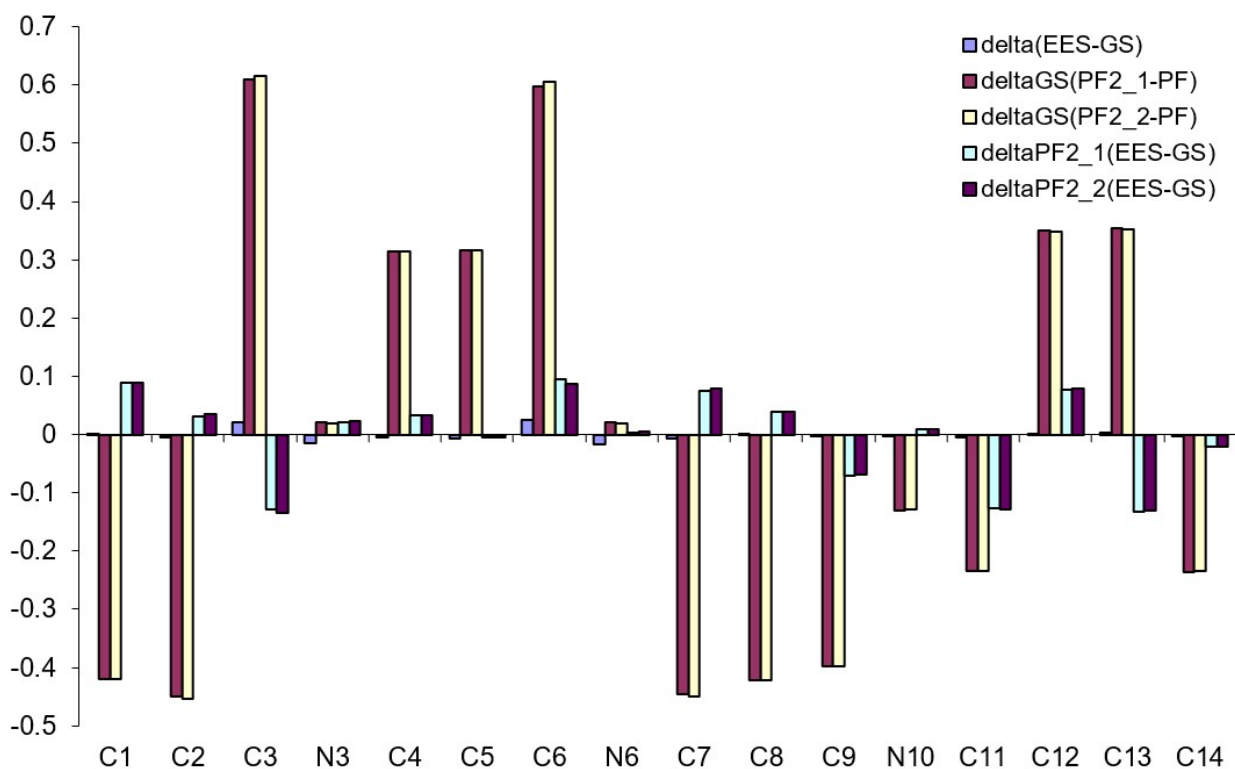

Fig. S42. Changes of NPA charges from Table S24

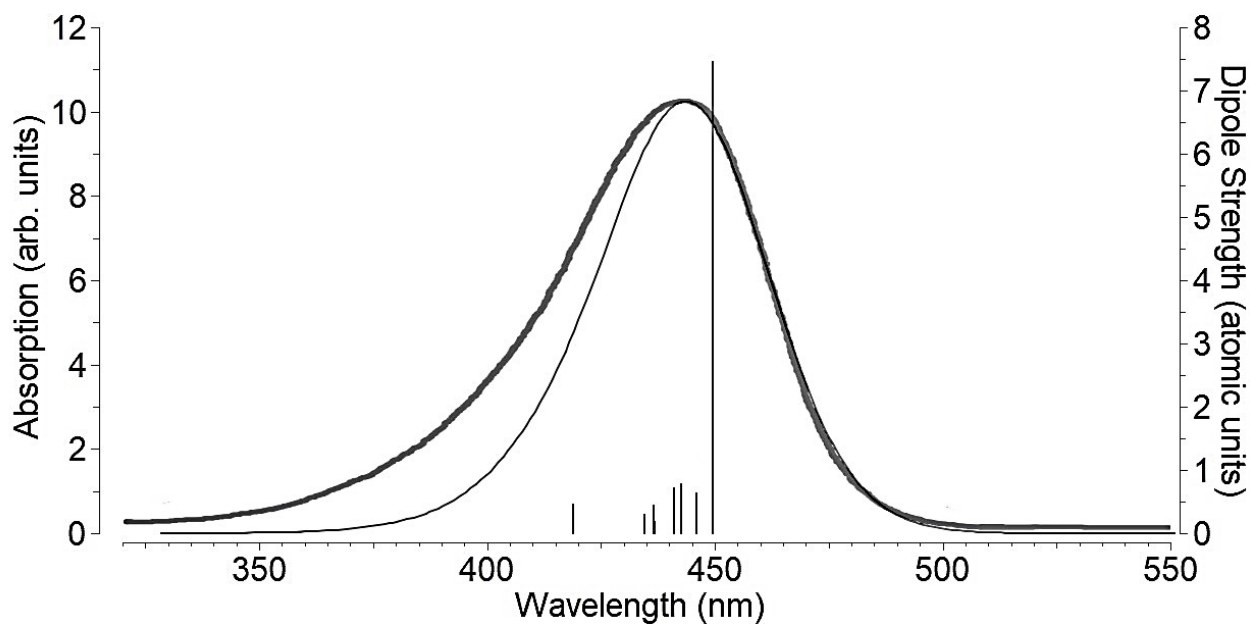

Fig. S43. Calculated (thin line, APFD functional) and experimental (thick line, adapted from Ref. [71], permission 5453060925345 from Wiley) absorption spectra of PF monomer in aqueous solution

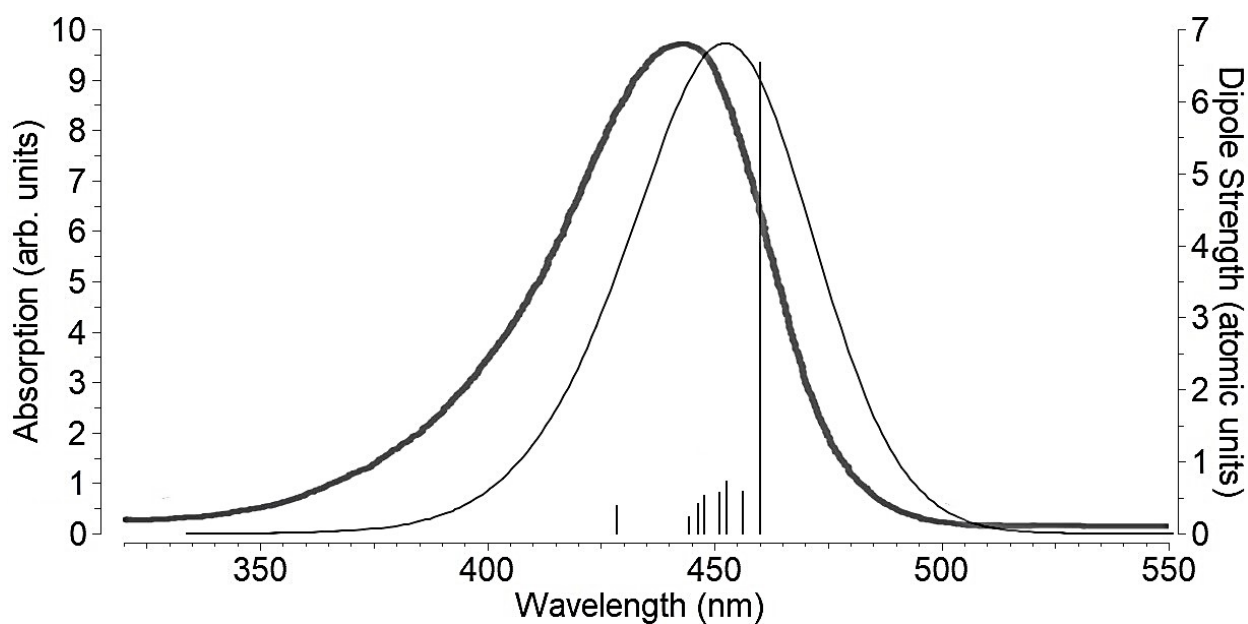

Fig. S44. Calculated (thin line, B3LYP functional with GD2 correction) and experimental (thick line [71]) absorption spectra of PF monomer in aqueous solution



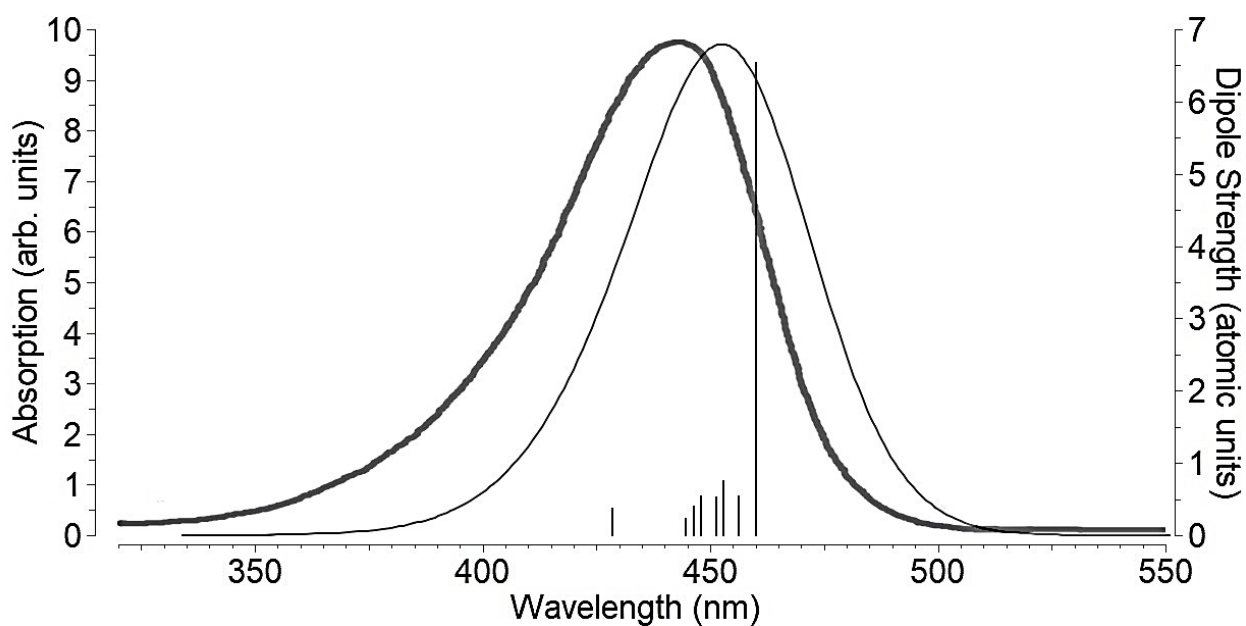

Fig. S45. Calculated (thin line, B3LYP functional with GD3 correction) and experimental (thick line [71]) absorption spectra of PF monomer in aqueous solution

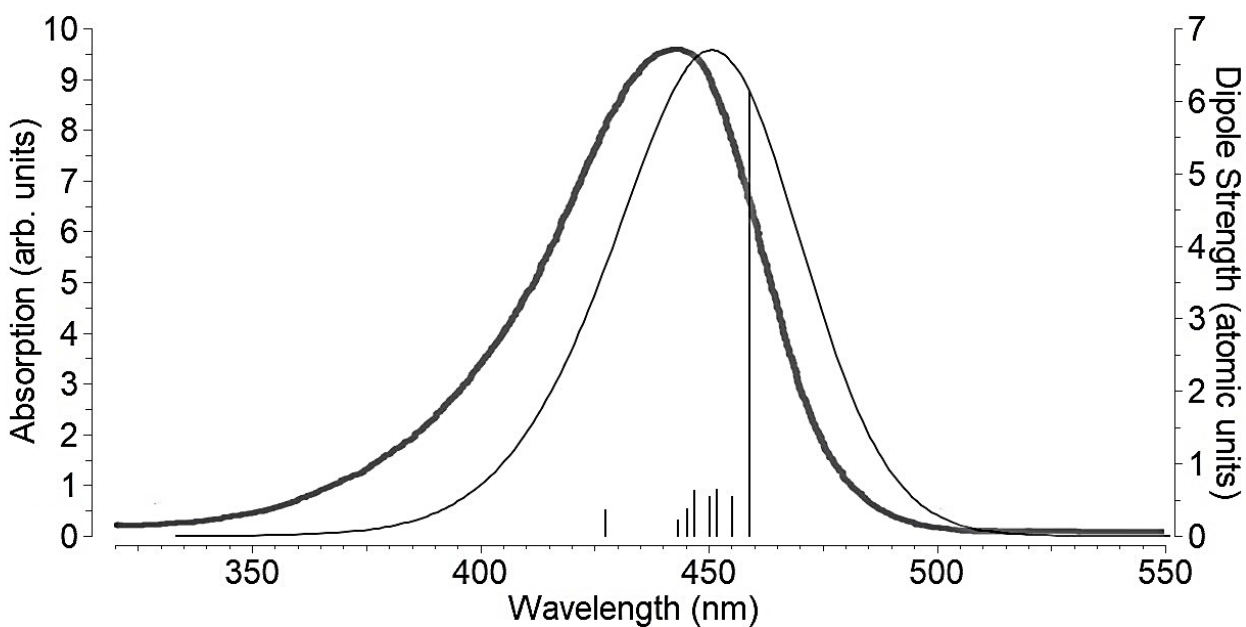

Fig. S46. Calculated (thin line, B3LYP functional with GD3+BJ correction) and experimental (thick line [71]) absorption spectra of PF monomer in aqueous solution

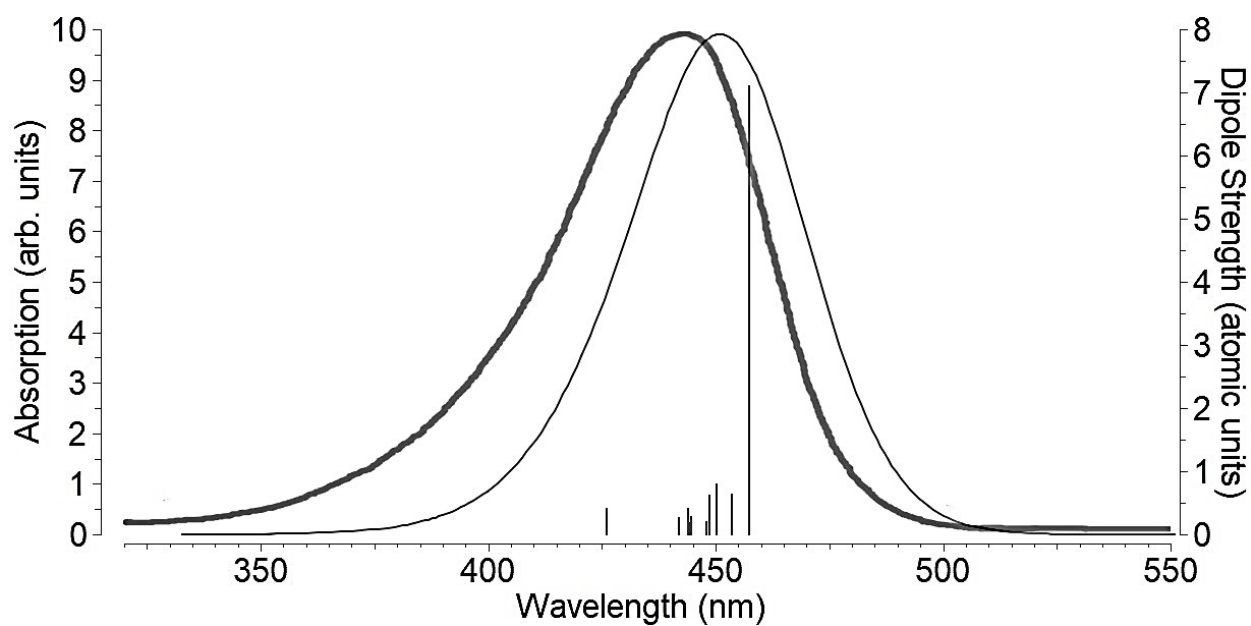

Fig. S47. Calculated (thin line, B3PW91 functional with GD3 correction) and experimental (thick line [71]) absorption spectra of PF monomer in aqueous solution

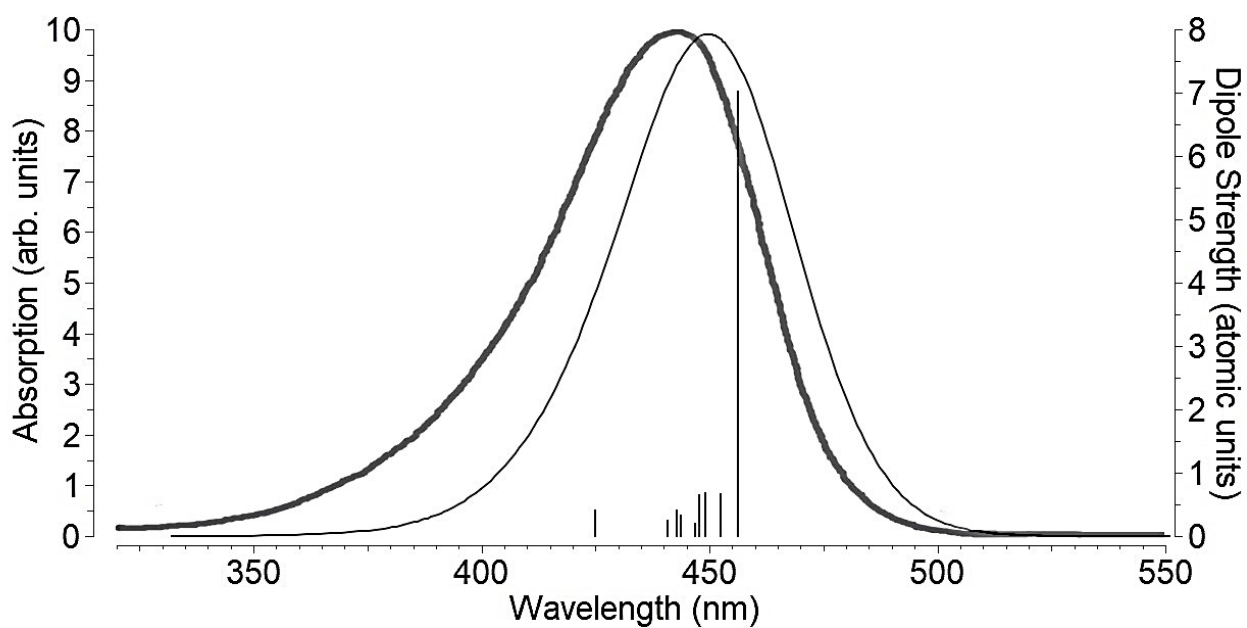

Fig. S48. Calculated (thin line, B3PW91 functional with GD3+BJ correction) and experimental (thick line [71]) absorption spectra of PF monomer in aqueous solution

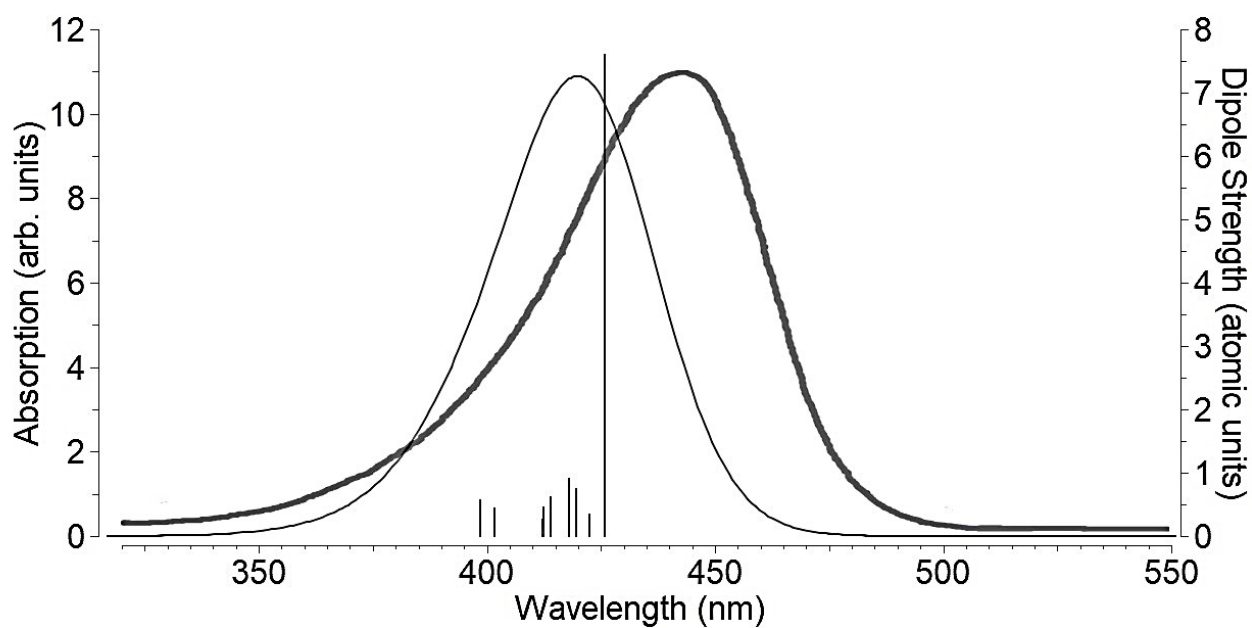

Fig. S49. Calculated (thin line, BMK functional with GD3 correction) and experimental (thick line [71]) absorption spectra of PF monomer in aqueous solution

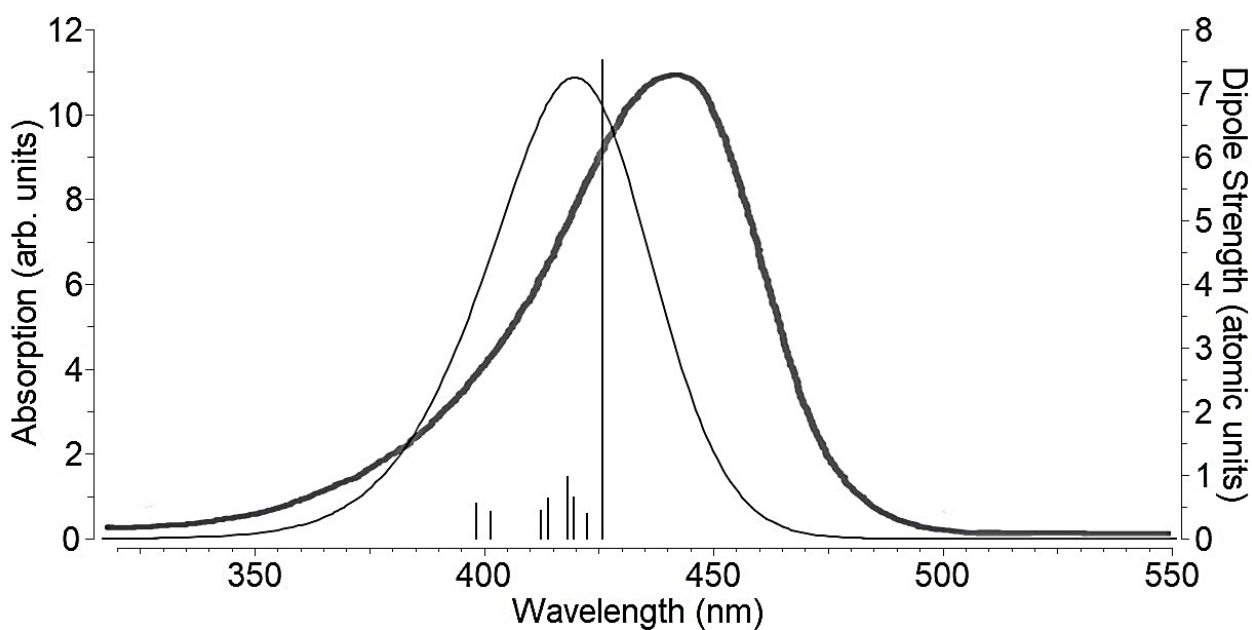

Fig. S50. Calculated (thin line, BMK functional with GD3+BJ correction) and experimental (thick line [71]) absorption spectra of PF monomer in aqueous solution

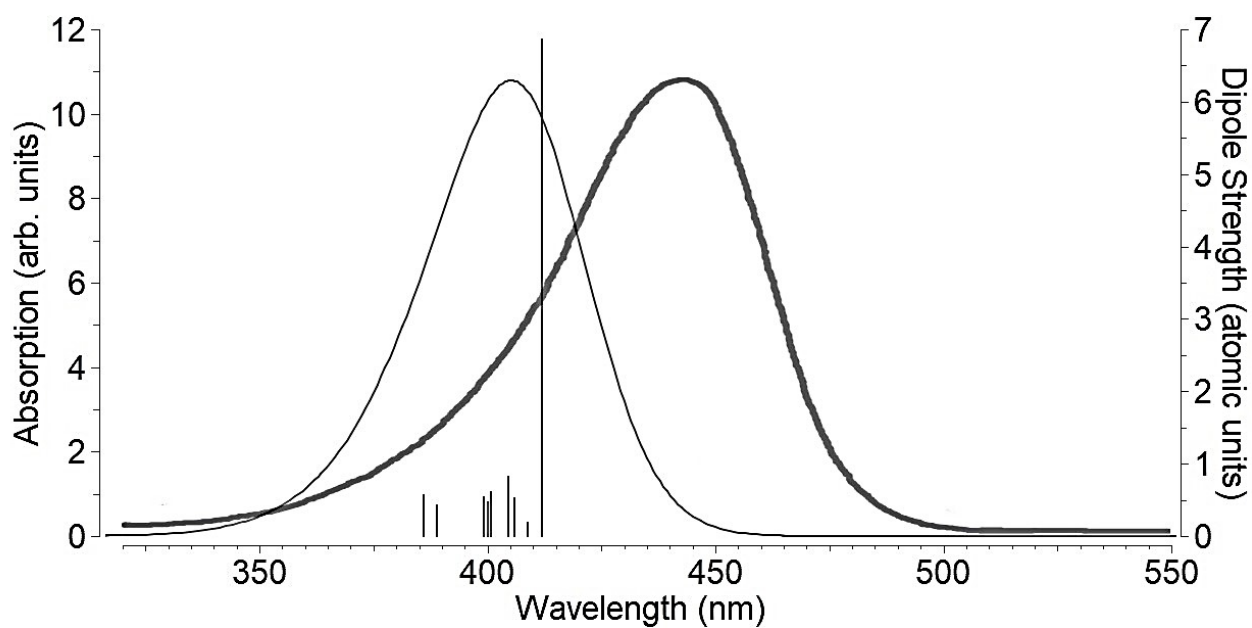

Fig. S51. Calculated (thin line, CAM-B3LYP functional with GD3 correction) and experimental (thick line [71]) absorption spectra of PF monomer in aqueous solution

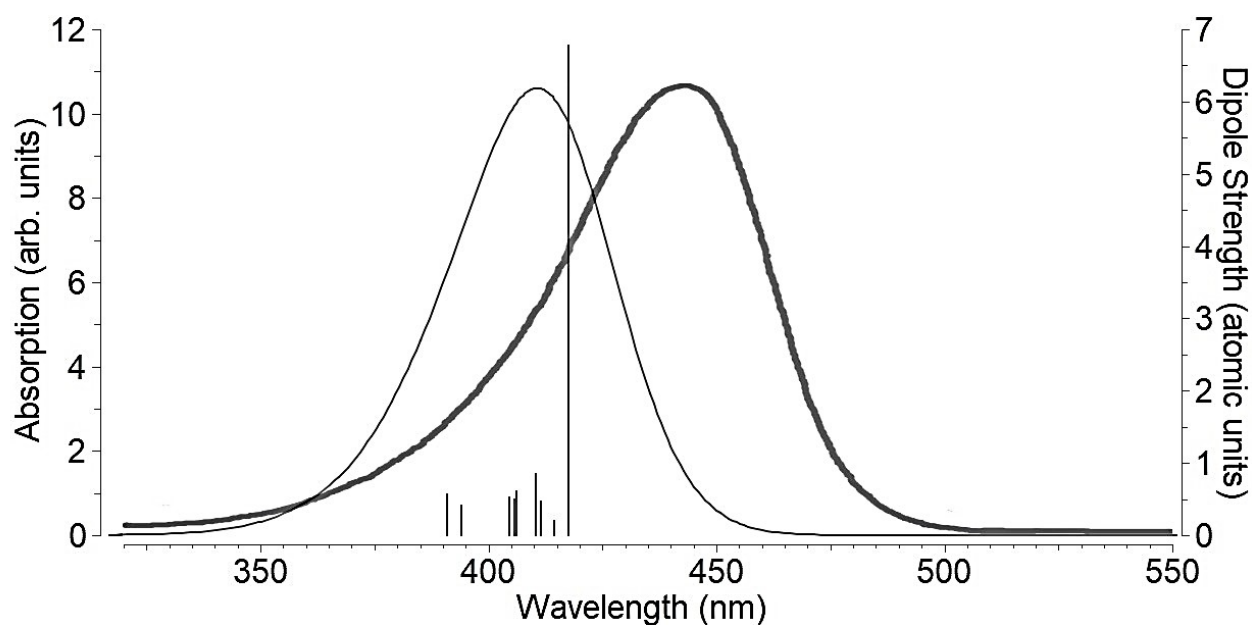

Fig. S52. Calculated (thin line, CAM-B3LYP functional with GD3+BJ correction) and experimental (thick line [71]) absorption spectra of PF monomer in aqueous solution

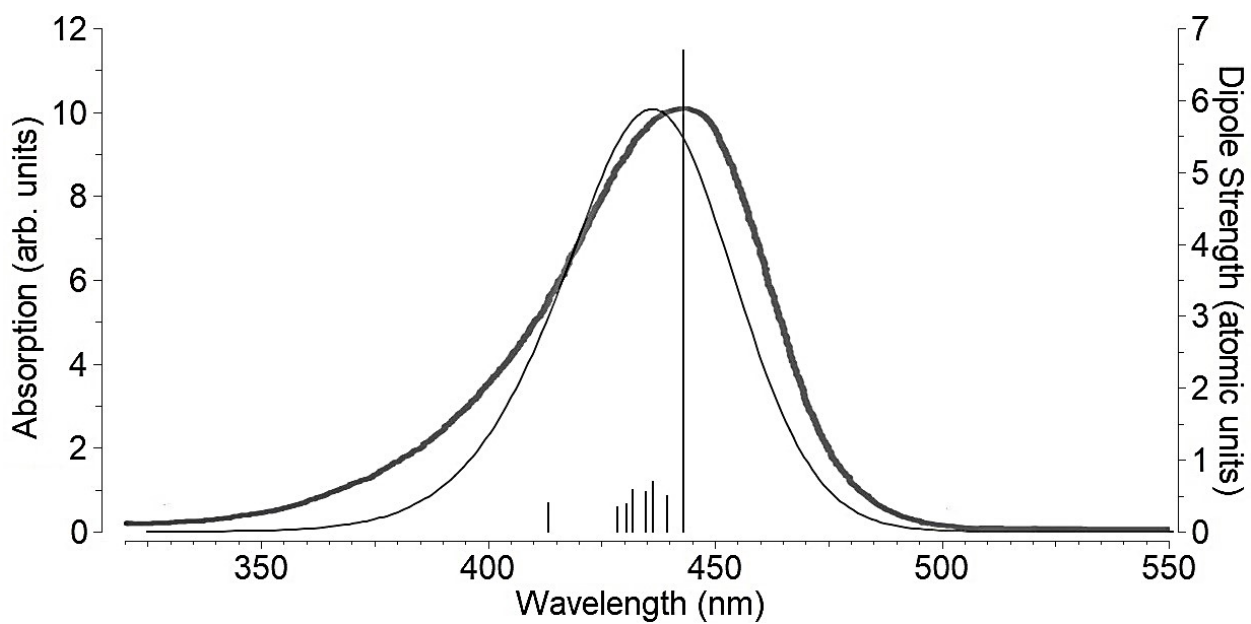

Fig. S53. Calculated (thin line, M05 functional with GD3 correction) and experimental (thick line [71]) absorption spectra of PF monomer in aqueous solution

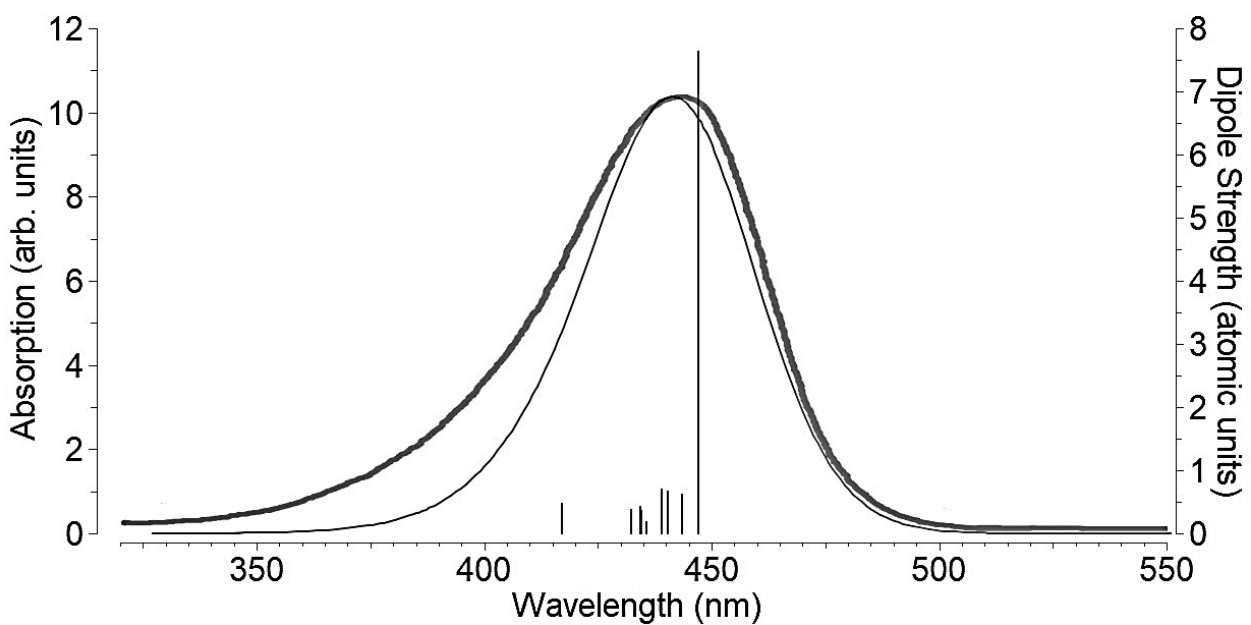

Fig. S54. Calculated (thin line, M06 functional) and experimental (thick line [71]) absorption spectra of PF monomer in aqueous solution



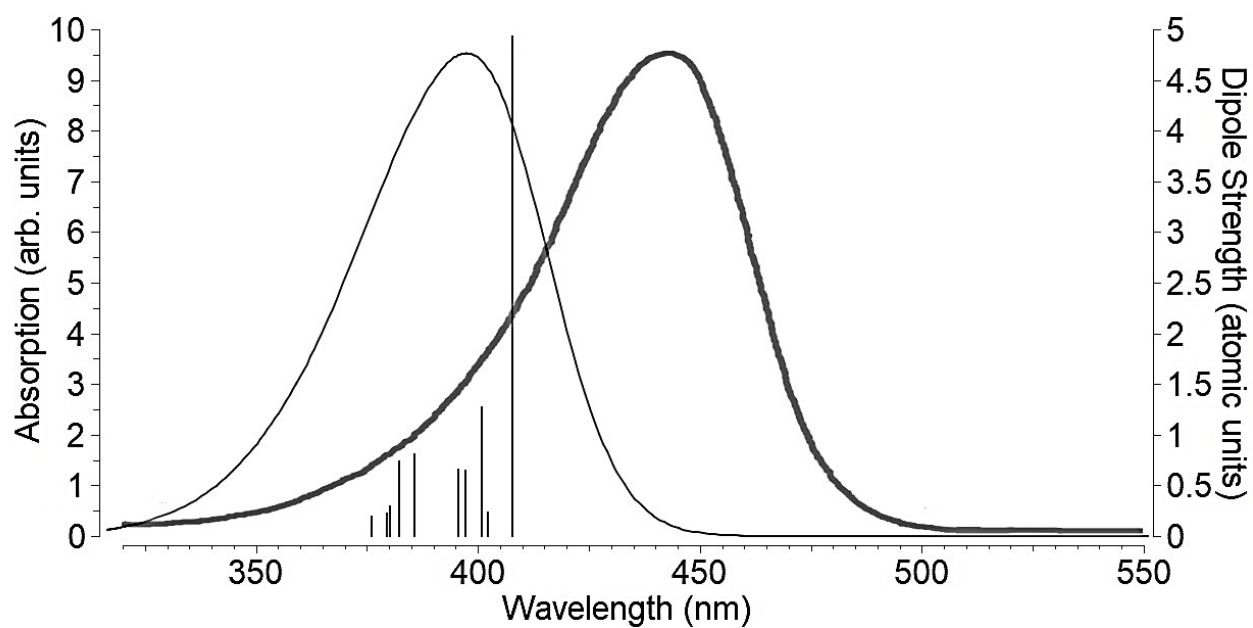

Fig. S55. Calculated (thin line, M06HF functional) and experimental (thick line [71]) absorption spectra of PF monomer in aqueous solution

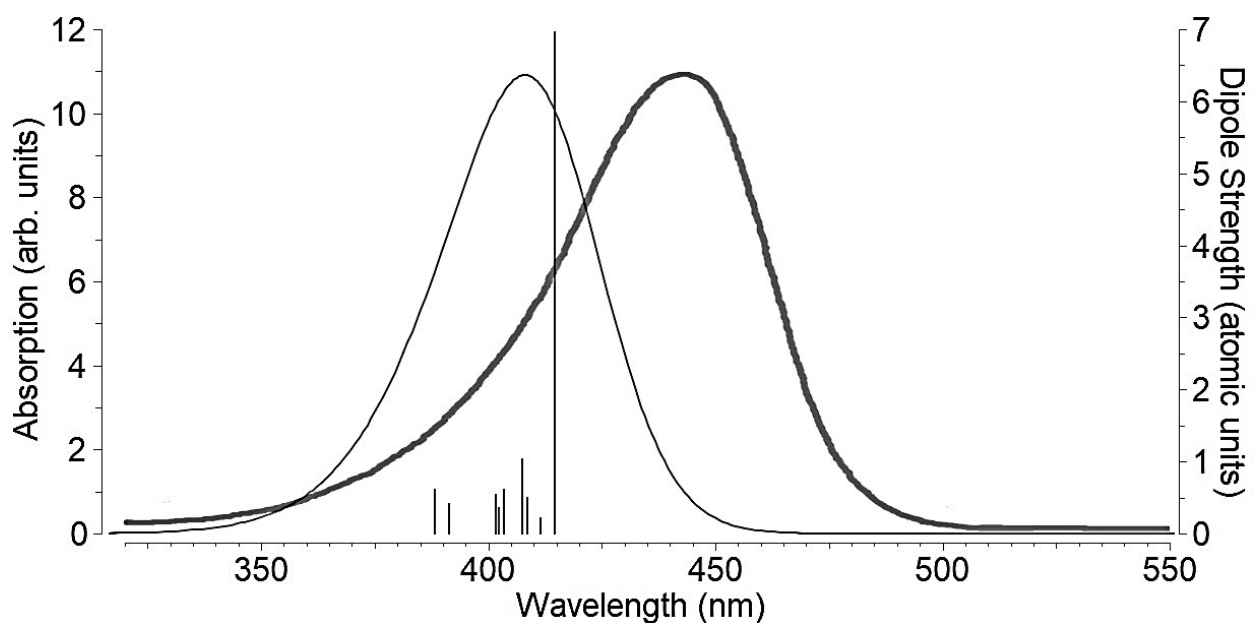

Fig. S56. Calculated (thin line, M052X functional) and experimental (thick line [71]) absorption spectra of PF monomer in aqueous solution

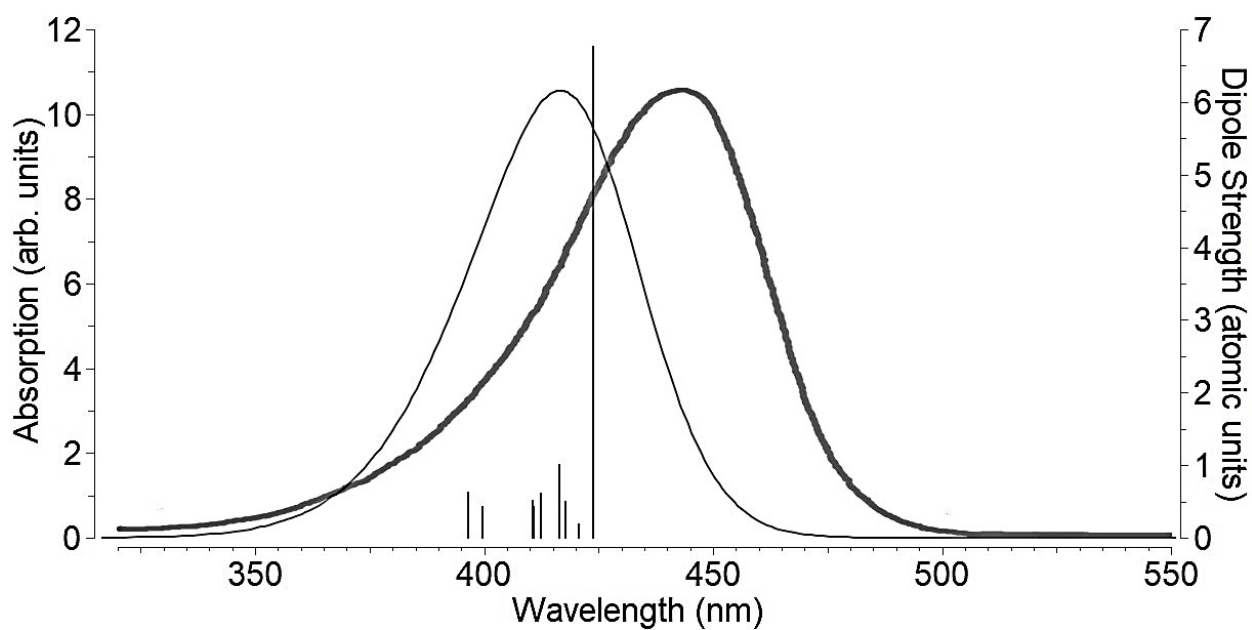

Fig. S57. Calculated (thin line, M062X functional) and experimental (thick line [71]) absorption spectra of PF monomer in aqueous solution

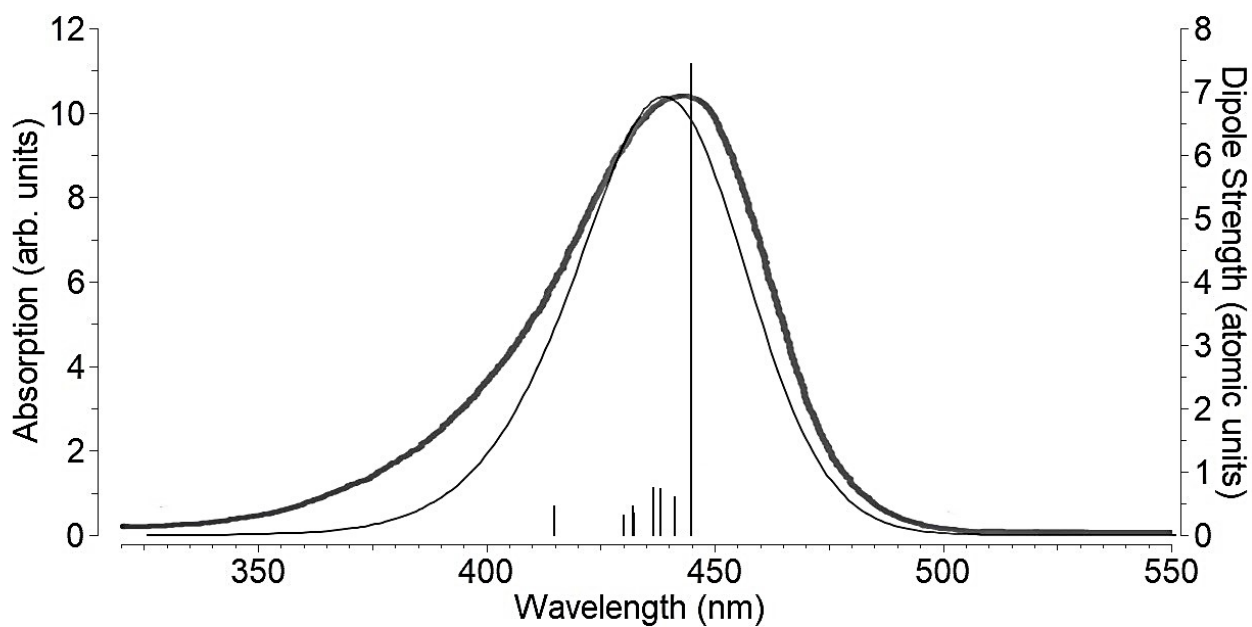

Fig. S58. Calculated (thin line, PBE0 functional with GD3 correction) and experimental (thick line [71]) absorption spectra of PF monomer in aqueous solution

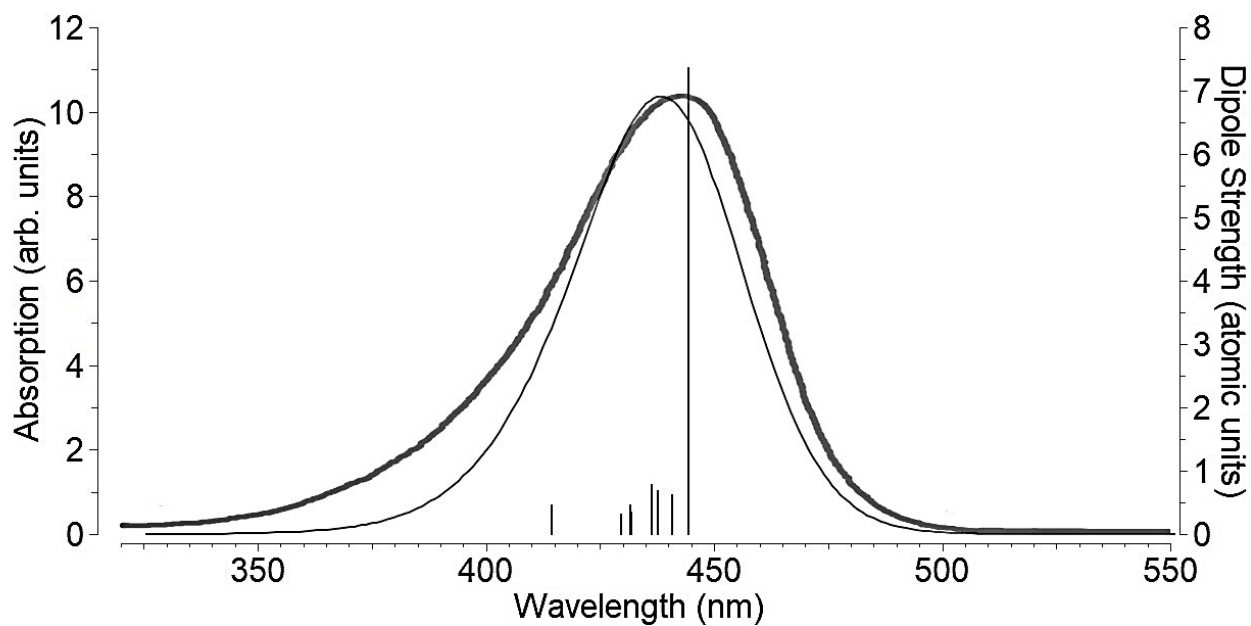

Fig. S59. Calculated (thin line, PBE0 functional with GD3+BJ correction) and experimental (thick line [71]) absorption spectra of PF monomer in aqueous solution

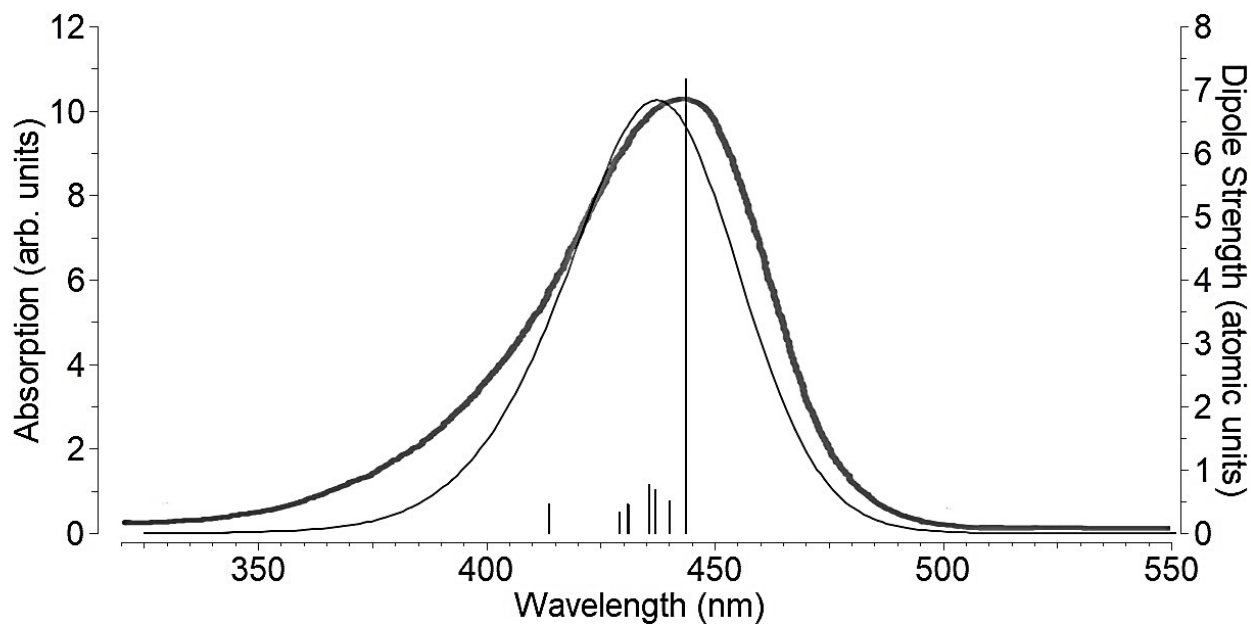

Fig. S60. Calculated (thin line, PW6B95 functional with GD3 correction) and experimental (thick line [71]) absorption spectra of PF monomer in aqueous solution

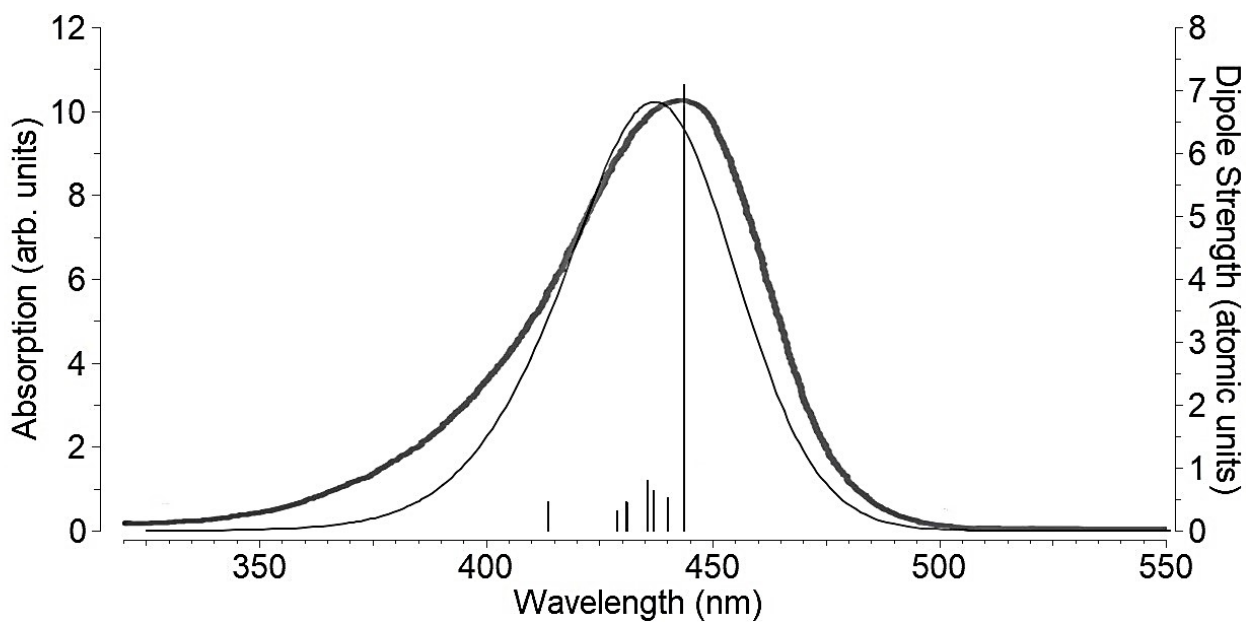

Fig. S61. Calculated (thin line, PW6B95 functional with GD3+BJ correction) and experimental (thick line [71]) absorption spectra of PF monomer in aqueous solution

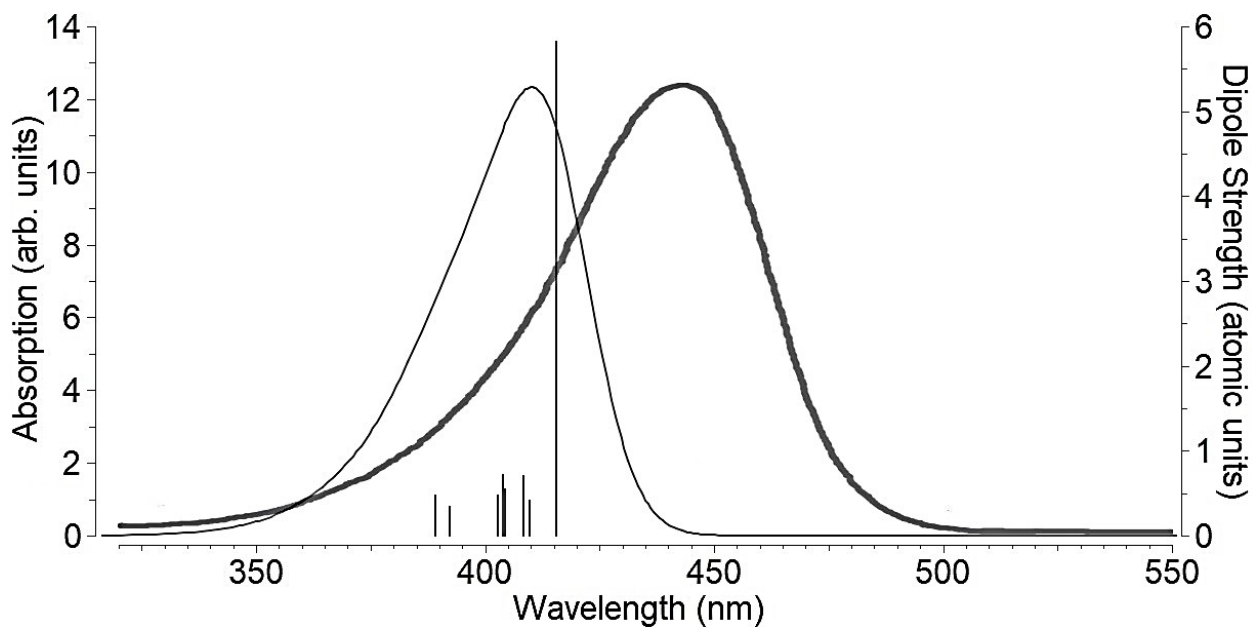

Fig. S62. Calculated (thin line,  $\omega$ B97XD functional) and experimental (thick line [71]) absorption spectra of PF monomer in aqueous solution

Table S25. Parameters of  $0 \rightarrow 0$  transition in PF dimer (M062X functional)

| Transition            | $\lambda$ (nm) | $\nu$ (cm <sup>-1</sup> ) | $I$  | $p$ (a.u.) |
|-----------------------|----------------|---------------------------|------|------------|
| $0_0 \rightarrow 0^0$ | 416            | -                         | 64.0 | 0.00727    |

Table S26. Vibronic transitions in PF dimer (M06HF functional)

| #  | Transition                 | $\lambda$ (nm) | $\nu$ (cm <sup>-1</sup> ) | $I$   | $p$ (a.u.) |
|----|----------------------------|----------------|---------------------------|-------|------------|
| 1  | $0_0 \rightarrow 0^0$      | 392.4          | -                         | 37610 | 4.02       |
| 2  | $0_0 \rightarrow 1^1$      | 392.1          | 20.3                      | 9576  | 1.02       |
| 3  | $0_0 \rightarrow 4^1$      | 391.3          | 72.3                      | 37890 | 4.04       |
| 4  | $0_0 \rightarrow 1^1 4^1$  | 391.0          | 20.3+72.3                 | 9288  | 0.989      |
| 5  | $0_0 \rightarrow 7^1$      | 390.9          | 98.9                      | 4863  | 0.518      |
| 6  | $0_0 \rightarrow 4^1$      | 390.2          | 145                       | 15840 | 1.68       |
| 7  | $0_0 \rightarrow 1^1 4^2$  | 389.9          | 20.3+145                  | 3707  | 0.394      |
| 8  | $0_0 \rightarrow 4^1 7^1$  | 389.8          | 72.3+98.9                 | 3742  | 0.397      |
| 9  | $0_0 \rightarrow 4^3$      | 389.1          | 217                       | 3442  | 0.365      |
| 10 | $0_0 \rightarrow 29^1$     | 386.0          | 419                       | 4058  | 0.427      |
| 11 | $0_0 \rightarrow 4^1 29^1$ | 385.0          | 72.3+419                  | 3923  | 0.411      |

Table S27. Vibronic transitions in PF dimer ( $\omega$ B97XD functional)

| #  | Transition                | $\lambda$ (nm) | $\nu$ (cm <sup>-1</sup> ) | $I$   | $p$ (a.u.) |
|----|---------------------------|----------------|---------------------------|-------|------------|
| 1  | $0_0 \rightarrow 0^0$     | 409.0          | -                         | 140.2 | 0.0156     |
| 2  | $0_0 \rightarrow 2^3$     | 407.6          | 79.9                      | 5500  | 0.611      |
| 3  | $0_0 \rightarrow 2^4$     | 407.2          | 107                       | 7715  | 0.856      |
| 4  | $0_0 \rightarrow 2^5$     | 406.8          | 133                       | 8203  | 0.909      |
| 5  | $0_0 \rightarrow 2^3 3^1$ | 406.7          | 79.9+59.1                 | 5392  | 0.597      |
| 6  | $0_0 \rightarrow 2^6$     | 406.3          | 160                       | 6853  | 0.759      |
| 7  | $0_0 \rightarrow 2^4 3^1$ | 406.2          | 107+58                    | 7560  | 0.837      |
| 8  | $0_0 \rightarrow 2^7$     | 405.9          | 186                       | 4600  | 0.509      |
| 9  | $0_0 \rightarrow 2^5 3^1$ | 405.8          | 133+59.1                  | 8034  | 0.888      |
| 10 | $0_0 \rightarrow 2^6 3^1$ | 405.3          | 160+59.1                  | 6708  | 0.741      |
| 11 | $0_0 \rightarrow 2^4 3^2$ | 405.3          | 107+117                   | 3539  | 0.391      |
| 12 | $0_0 \rightarrow 2^7 3^1$ | 404.9          | 186+59.1                  | 4500  | 0.496      |
| 13 | $0_0 \rightarrow 2^5 3^2$ | 404.8          | 133+117                   | 3758  | 0.415      |
| 14 | $0_0 \rightarrow 2^6 3^2$ | 404.4          | 160+117                   | 3136  | 0.346      |

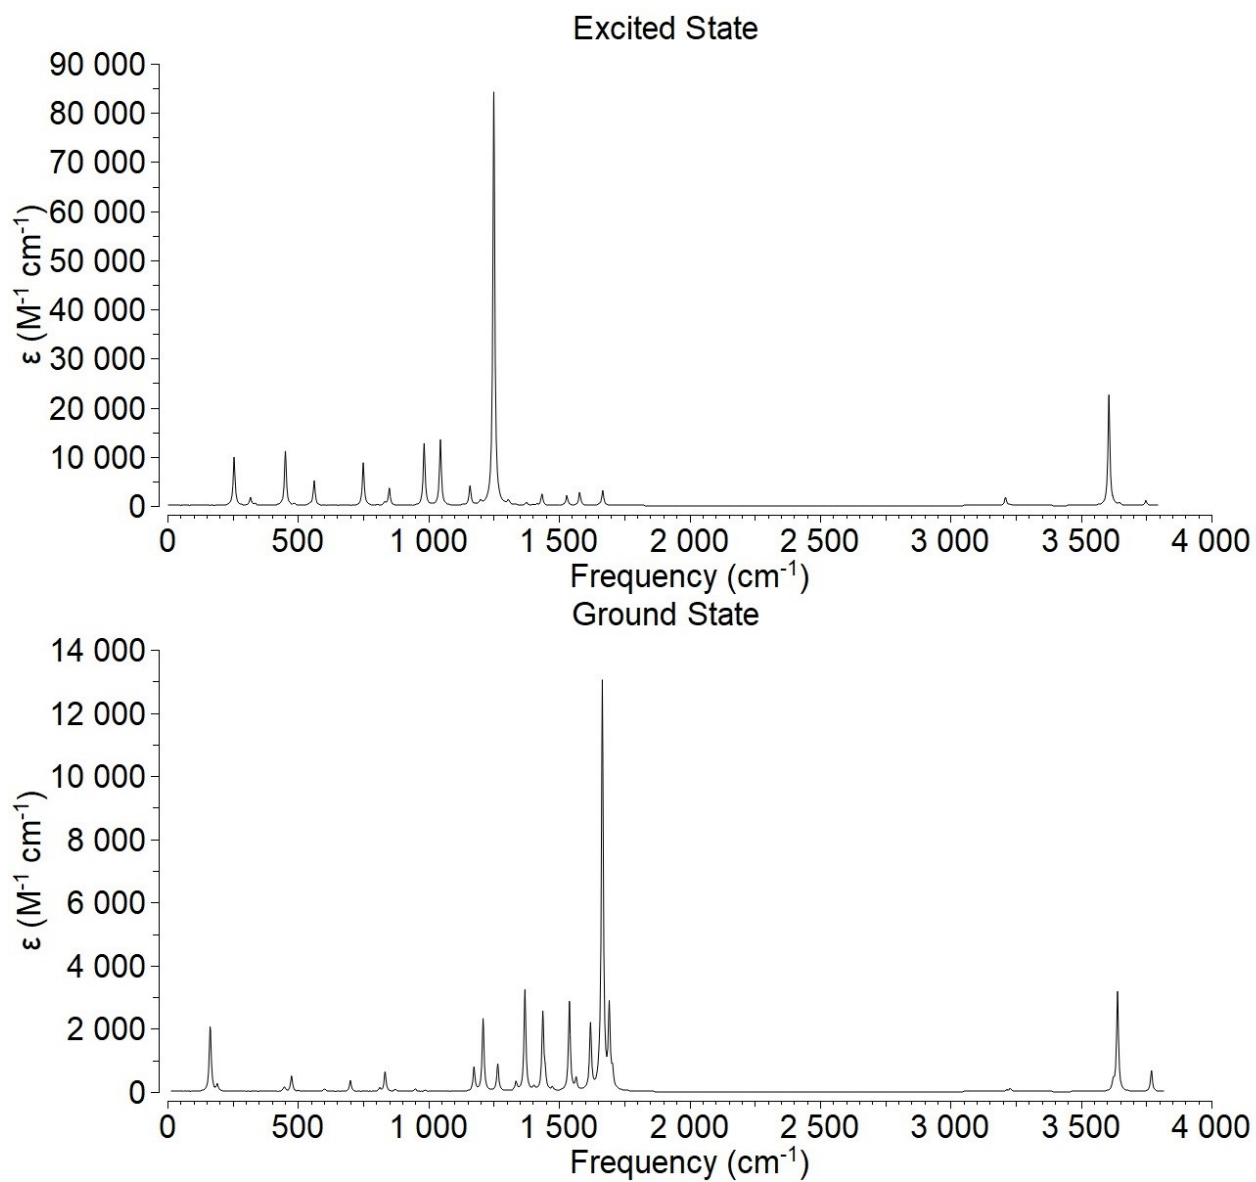

Fig. S63. Calculated vibrational spectra of PF monomer (APFD functional)



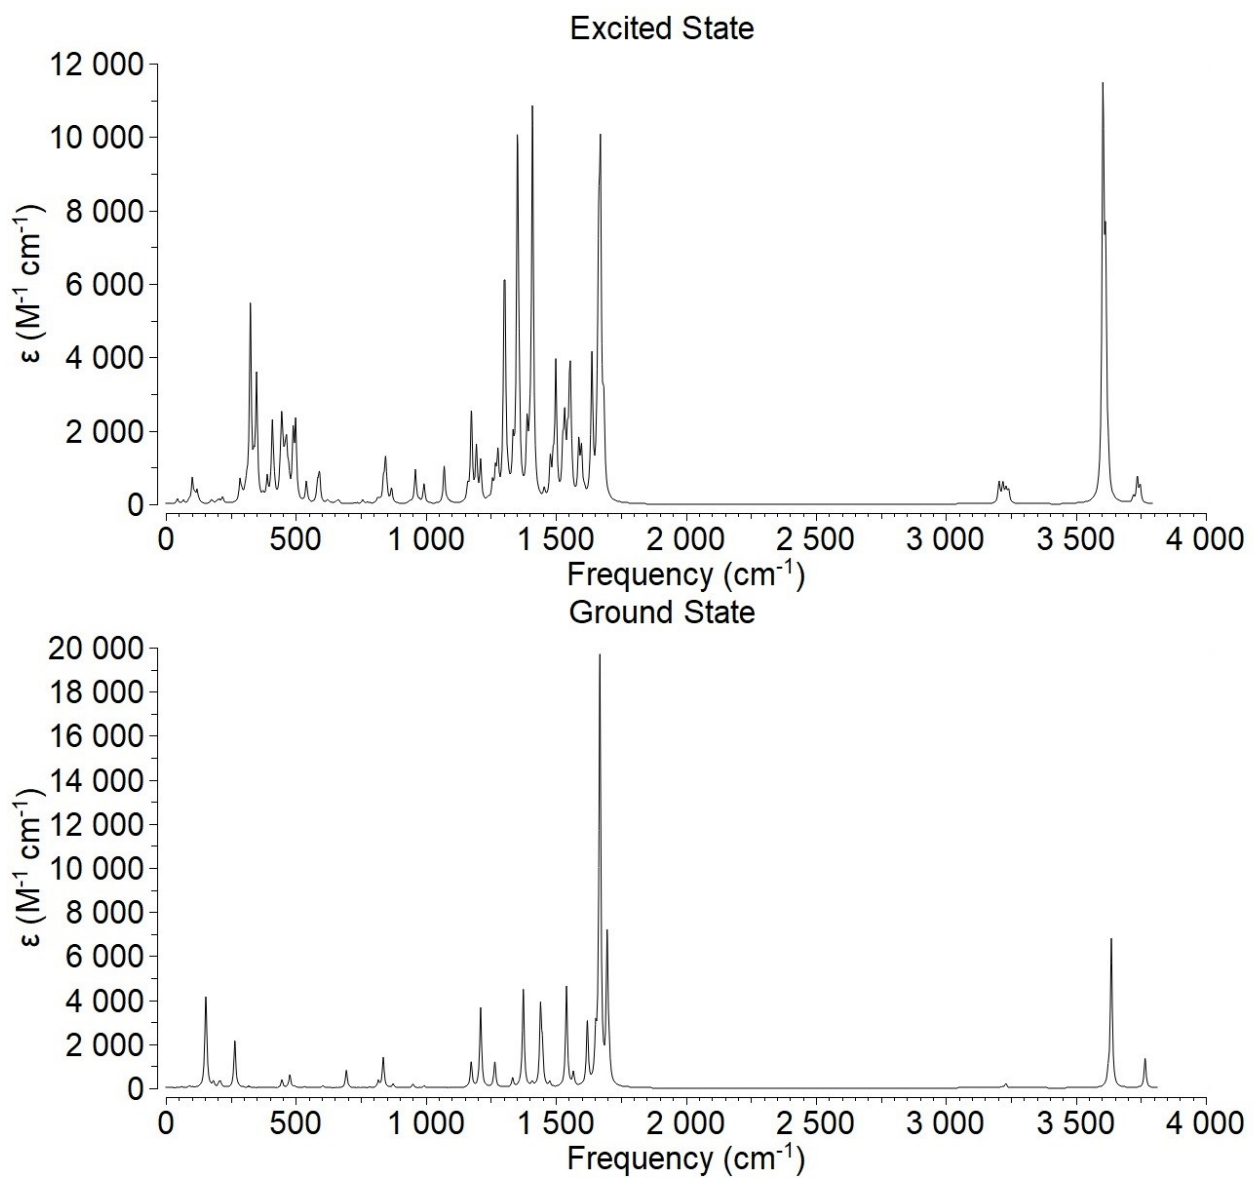

Fig. S64. Calculated vibrational spectra of PF dimer (APFD functional)

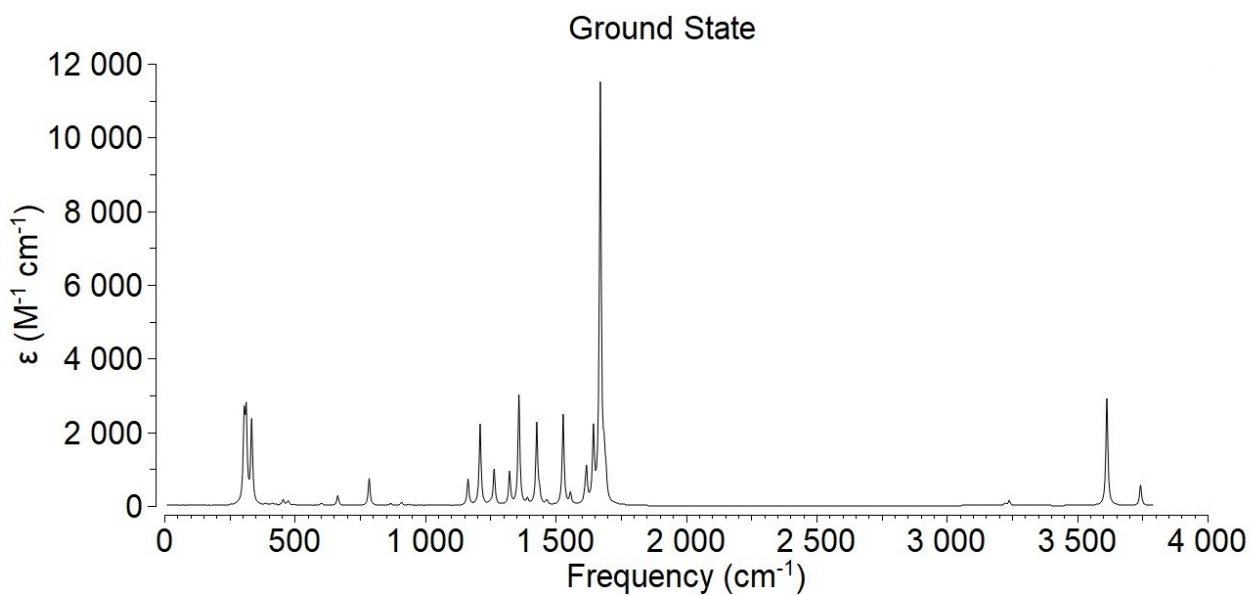

Fig. S65. Calculated vibrational spectra of PF monomer (B2PLYP functional with GD2 correction)

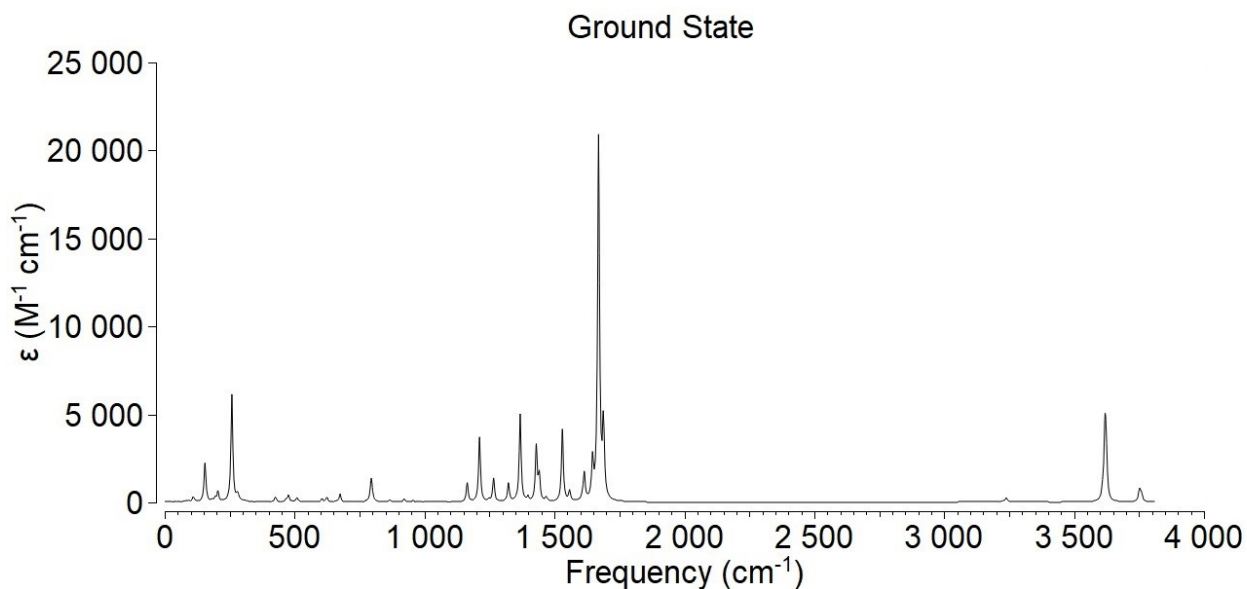

Fig. S66. Calculated vibrational spectra of PF dimer (B2PLYP functional with GD2 correction)

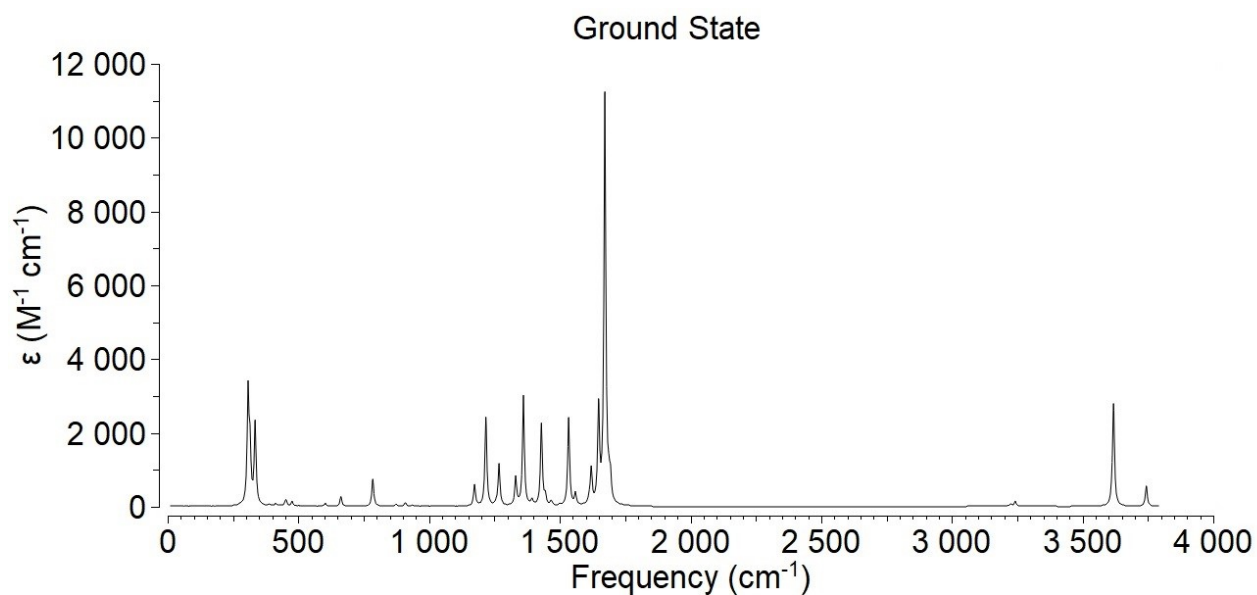

Fig. S67. Calculated vibrational spectra of PF monomer (B2PLYP functional with GD3 correction)

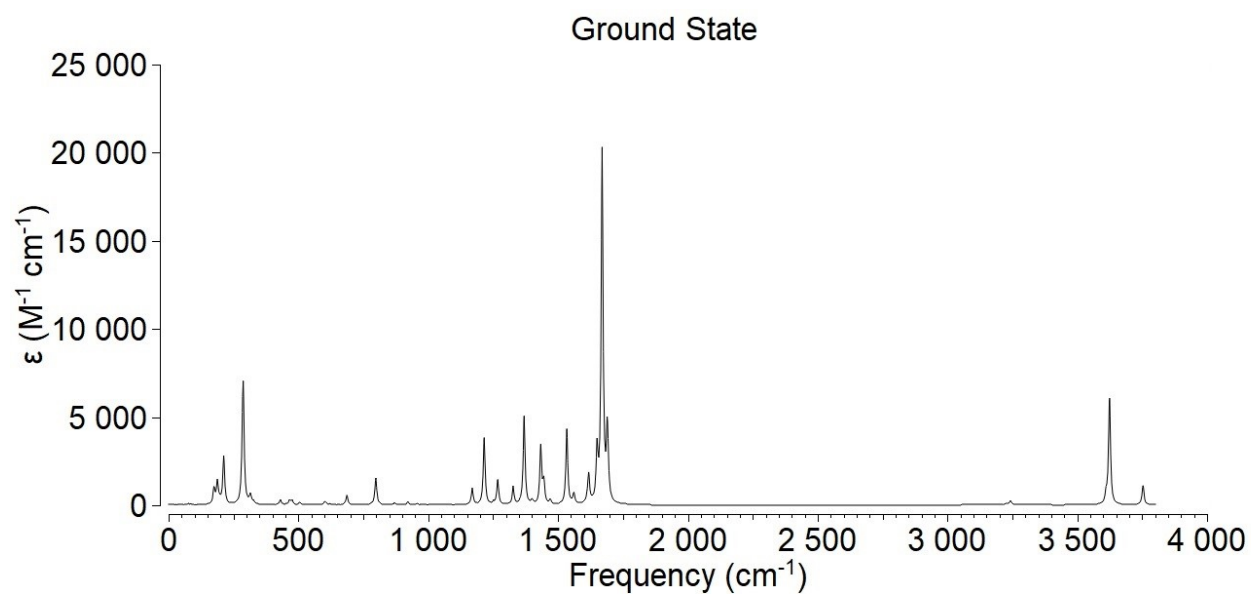

Fig. S68. Calculated vibrational spectra of PF dimer (B2PLYP functional with GD3 correction)

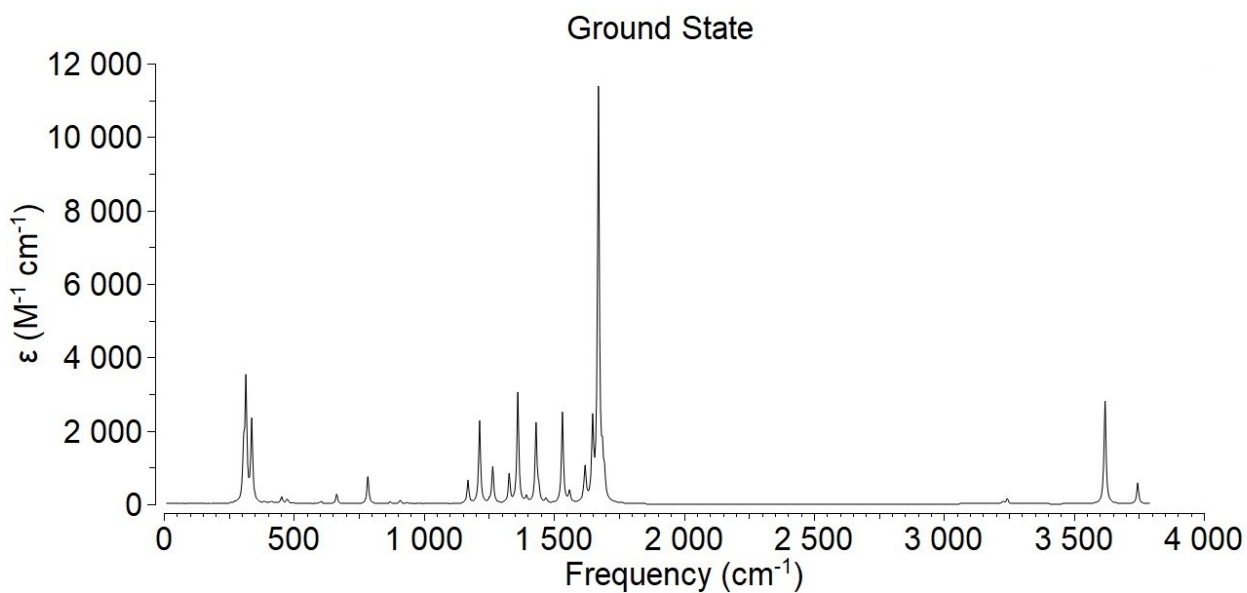

Fig. S69. Calculated vibrational spectra of PF monomer (B2PLYP functional with GD3+BJ correction)

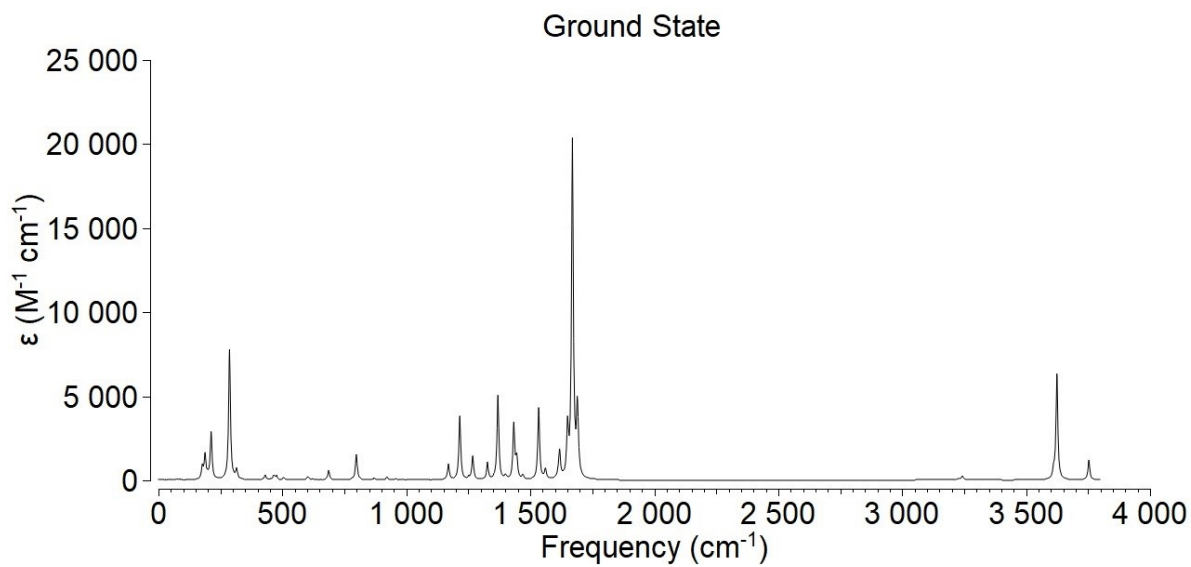

Fig. S70. Calculated vibrational spectra of PF dimer (B2PLYP functional with GD3+BJ correction)

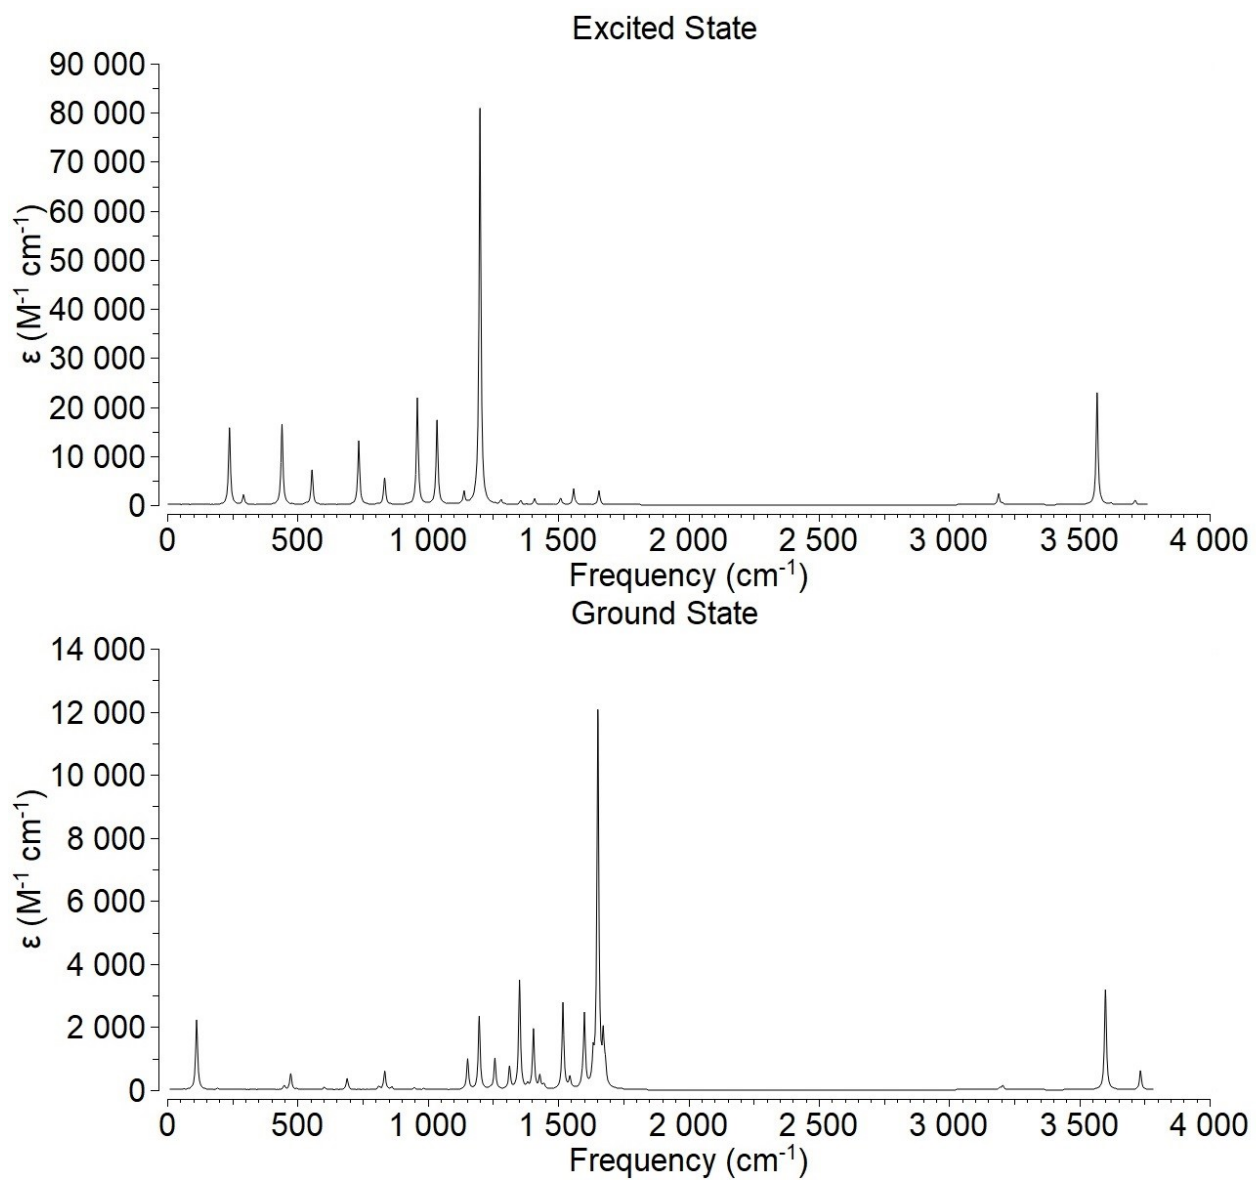

Fig. S71. Calculated vibrational spectra of PF monomer (B3LYP functional with GD2 correction)

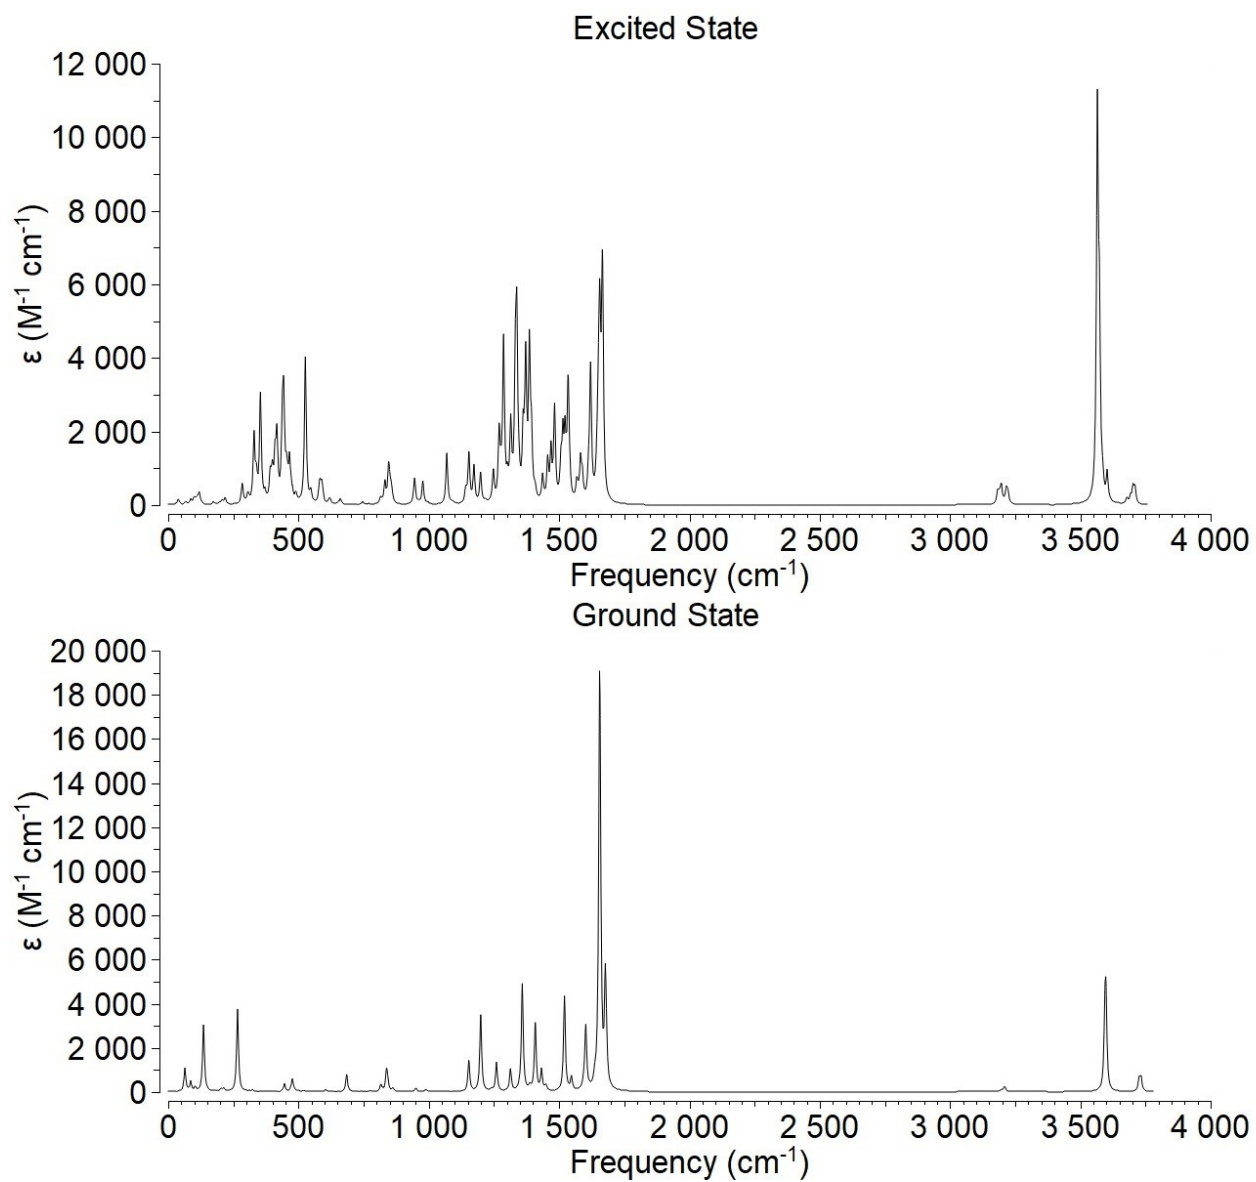

Fig. S72. Calculated vibrational spectra of PF dimer (B3LYP functional with GD2 correction)



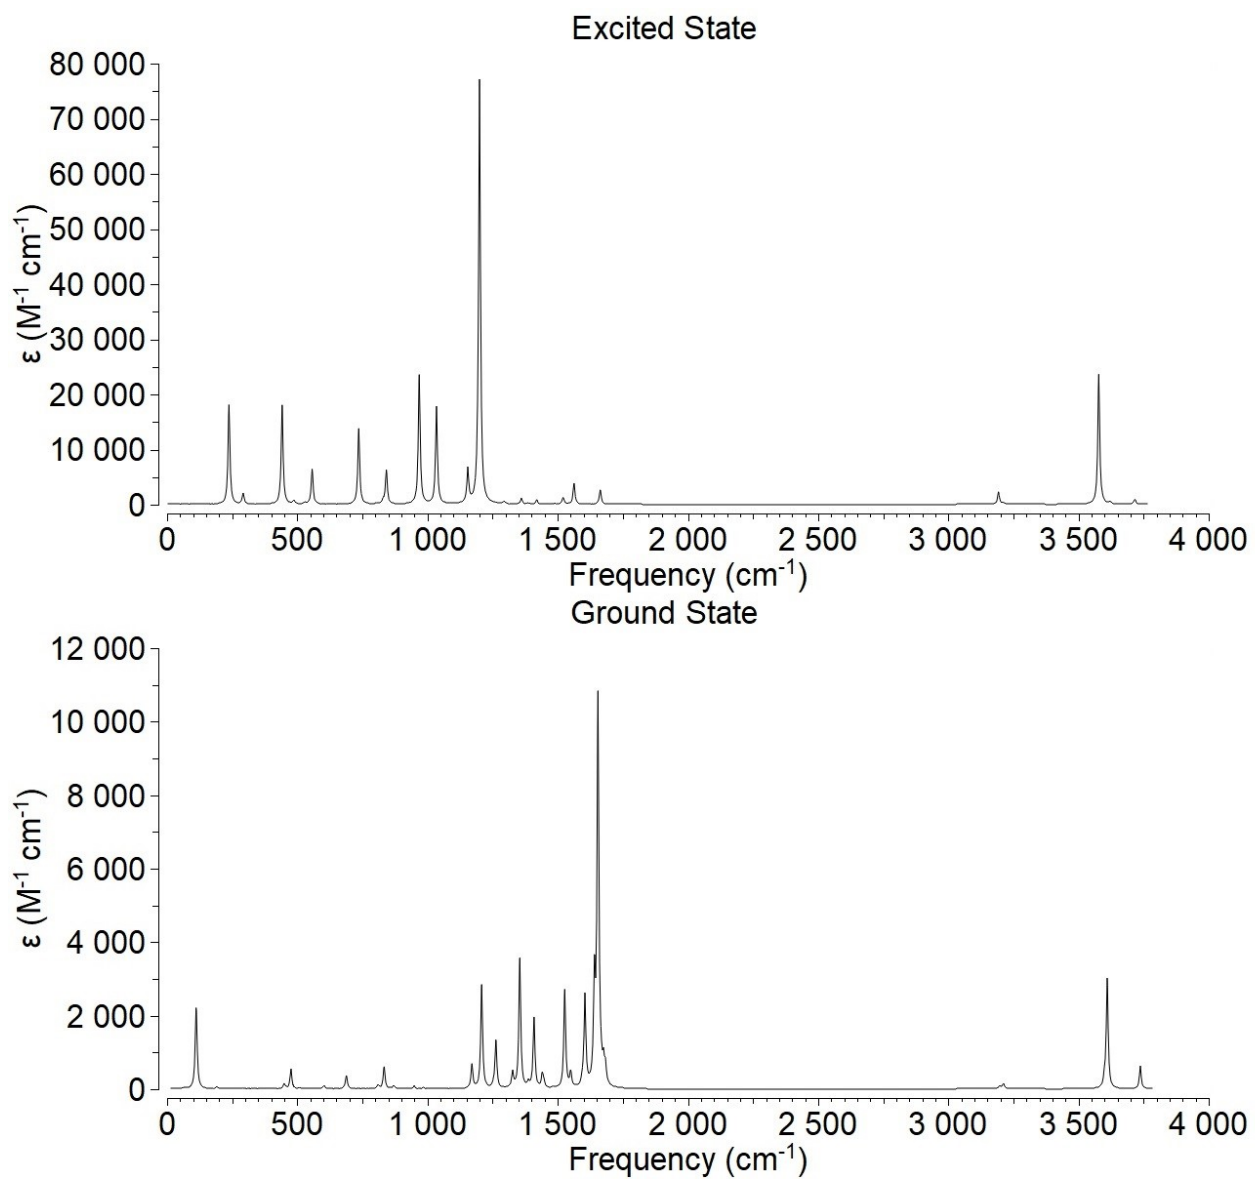

Fig. S73. Calculated vibrational spectra of PF monomer (B3LYP functional with GD3 correction)

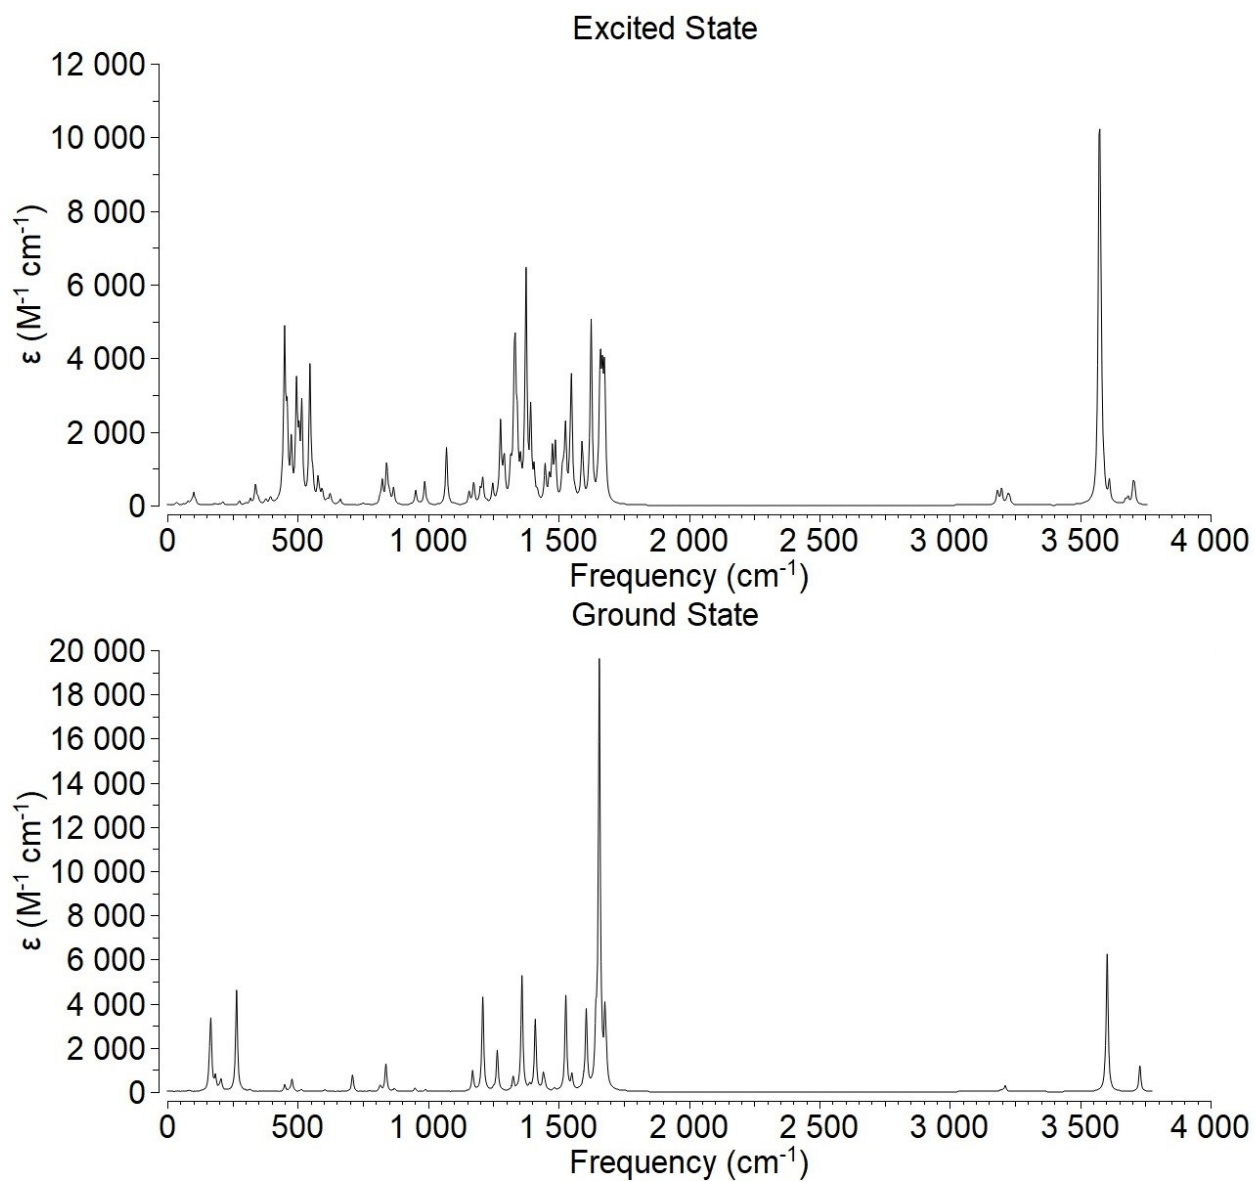

Fig. S74. Calculated vibrational spectra of PF dimer (B3LYP functional with GD3 correction)

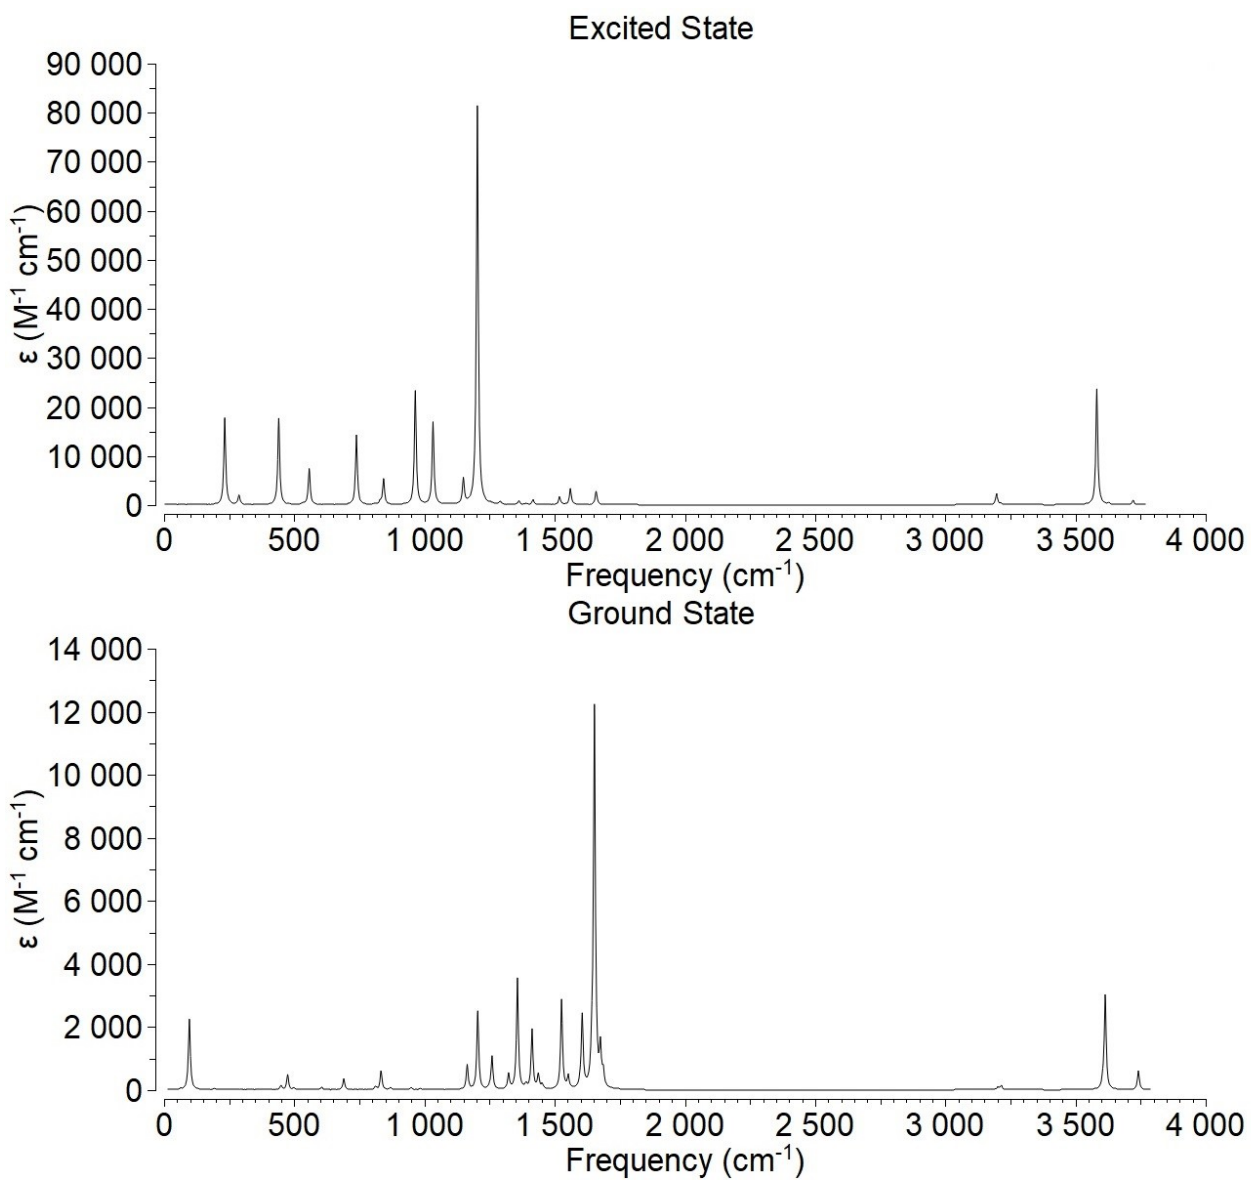

Fig. S75. Calculated vibrational spectra of PF monomer (B3LYP functional with GD3+BJ correction)

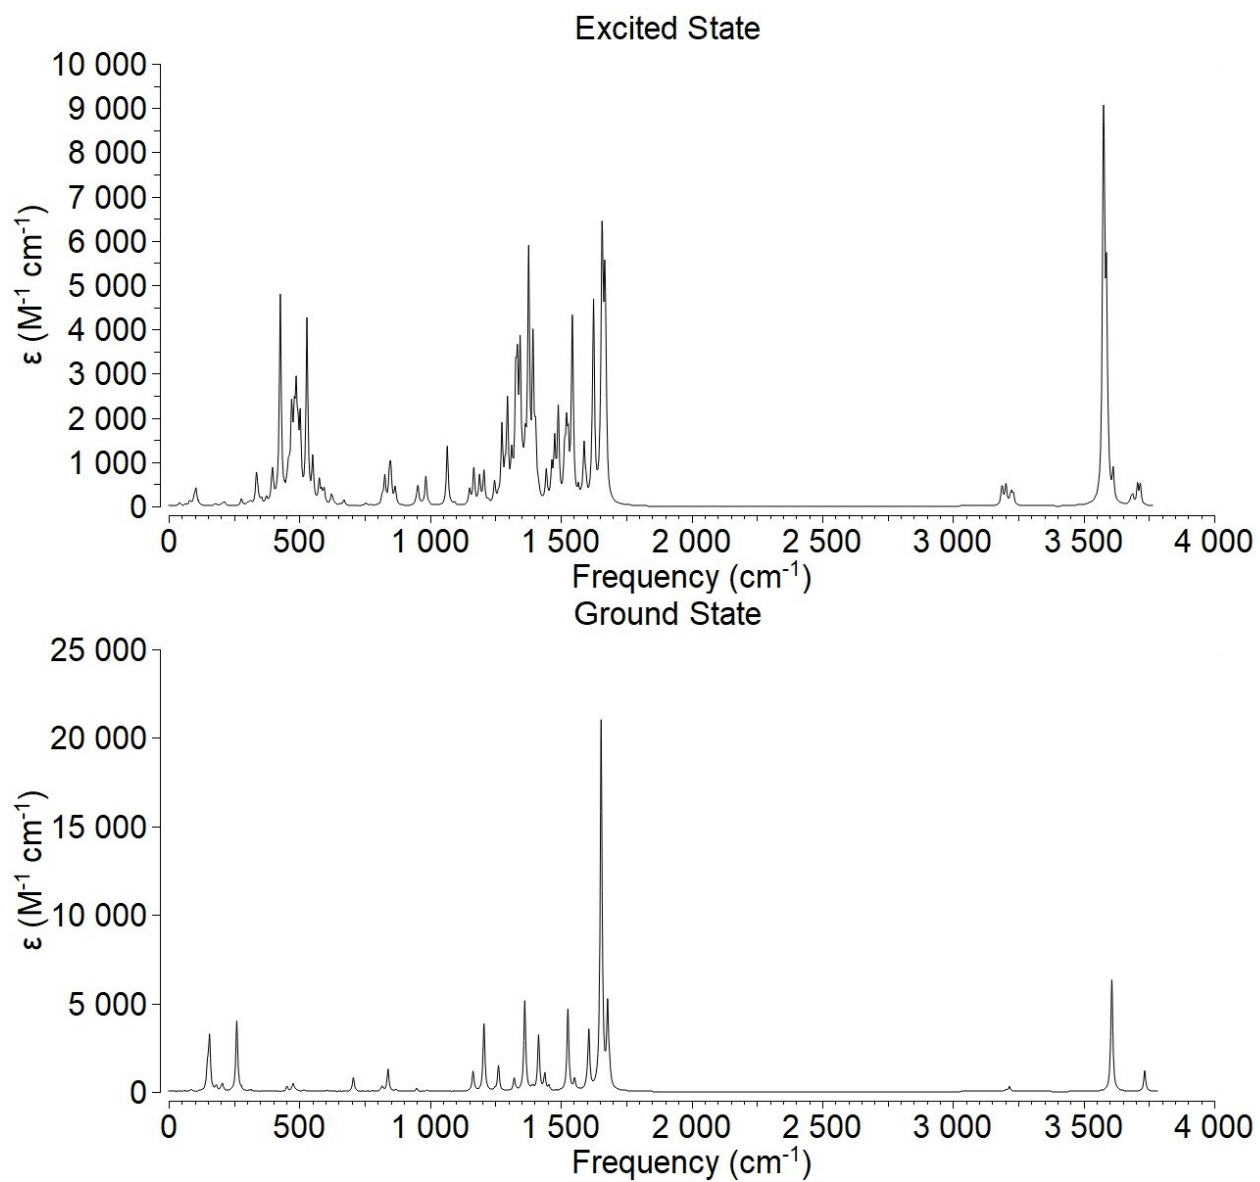

Fig. S76. Calculated vibrational spectra of PF dimer (B3LYP functional with GD3+BJ correction)

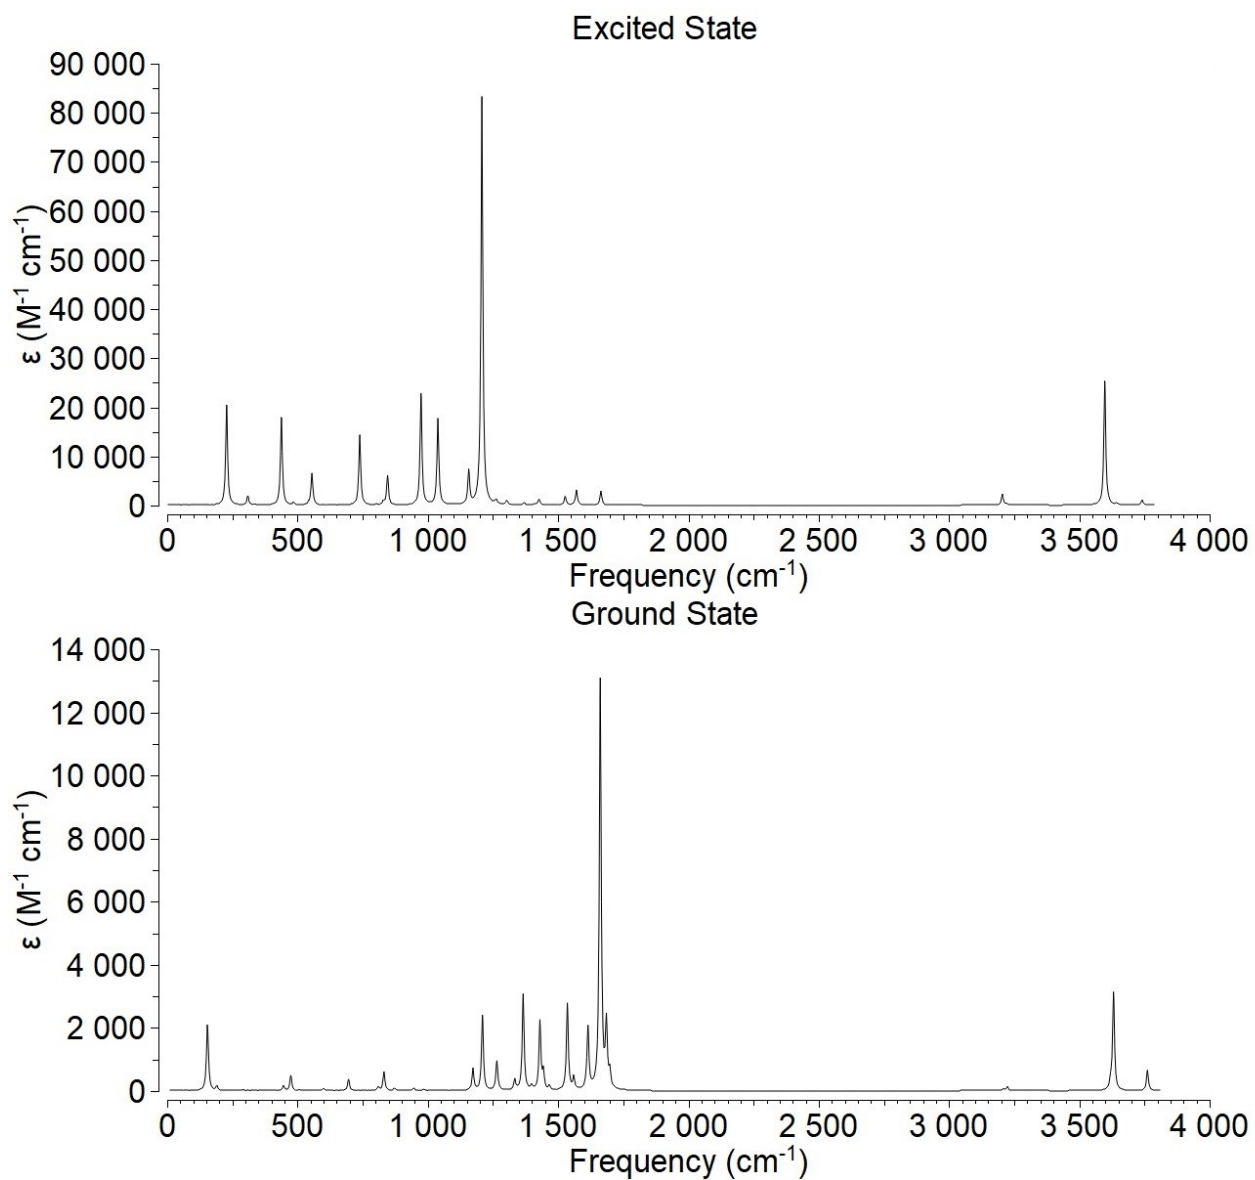

Fig. S77. Calculated vibrational spectra of PF monomer (B3PW91 functional with GD3 correction)

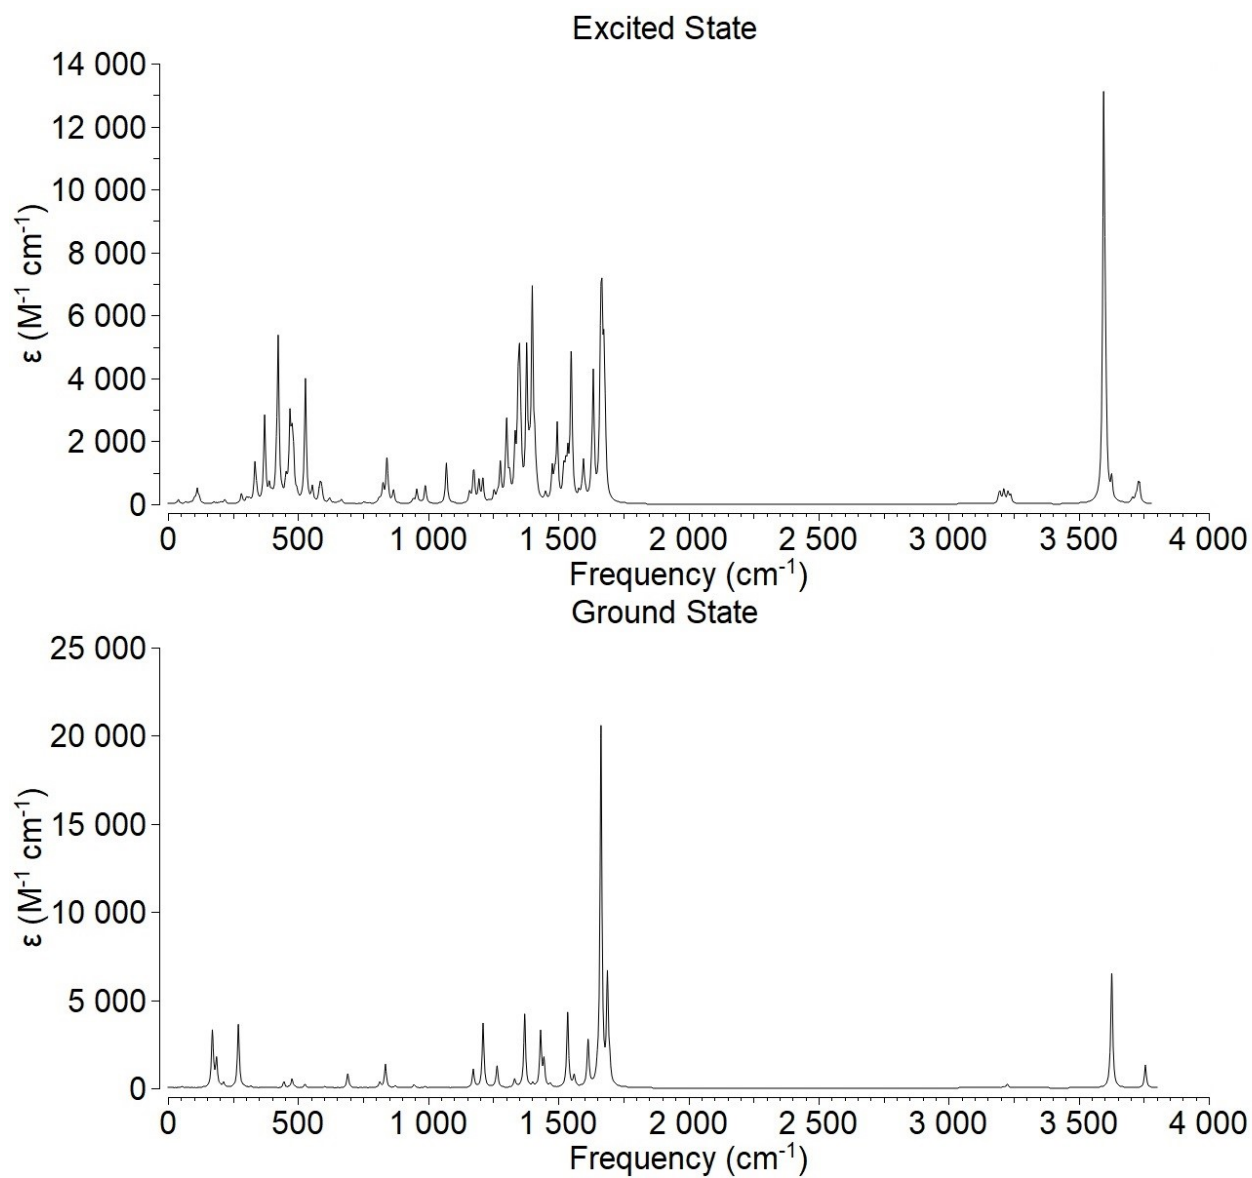

Fig. S78. Calculated vibrational spectra of PF dimer (B3PW91 functional with GD3 correction)



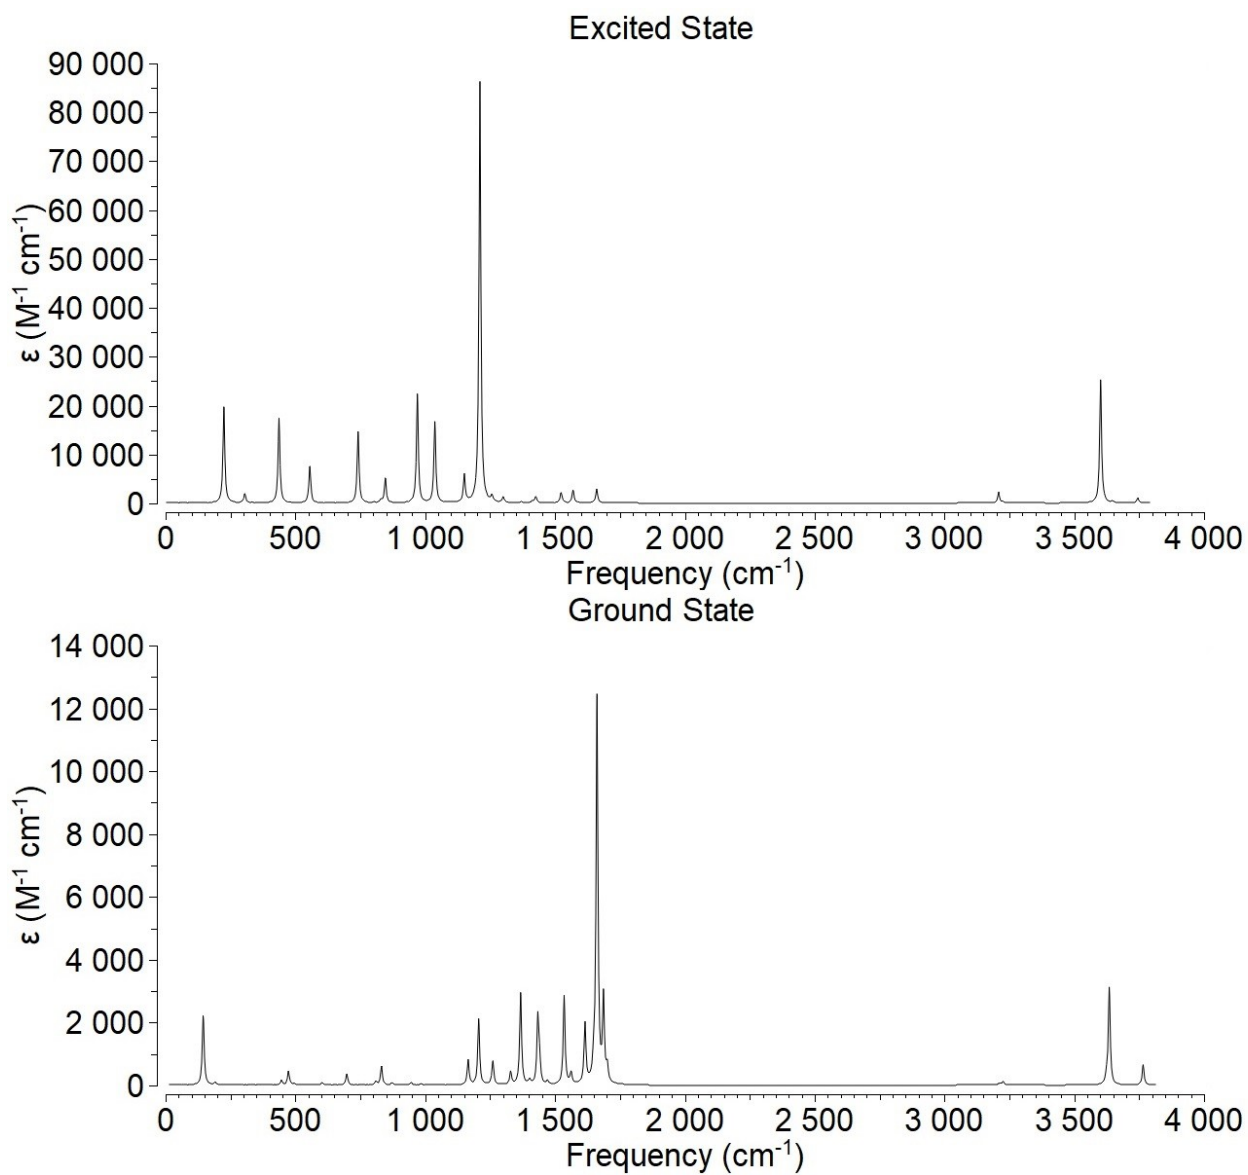

Fig. S79. Calculated vibrational spectra of PF monomer (B3PW91 functional with GD3+BJ correction)

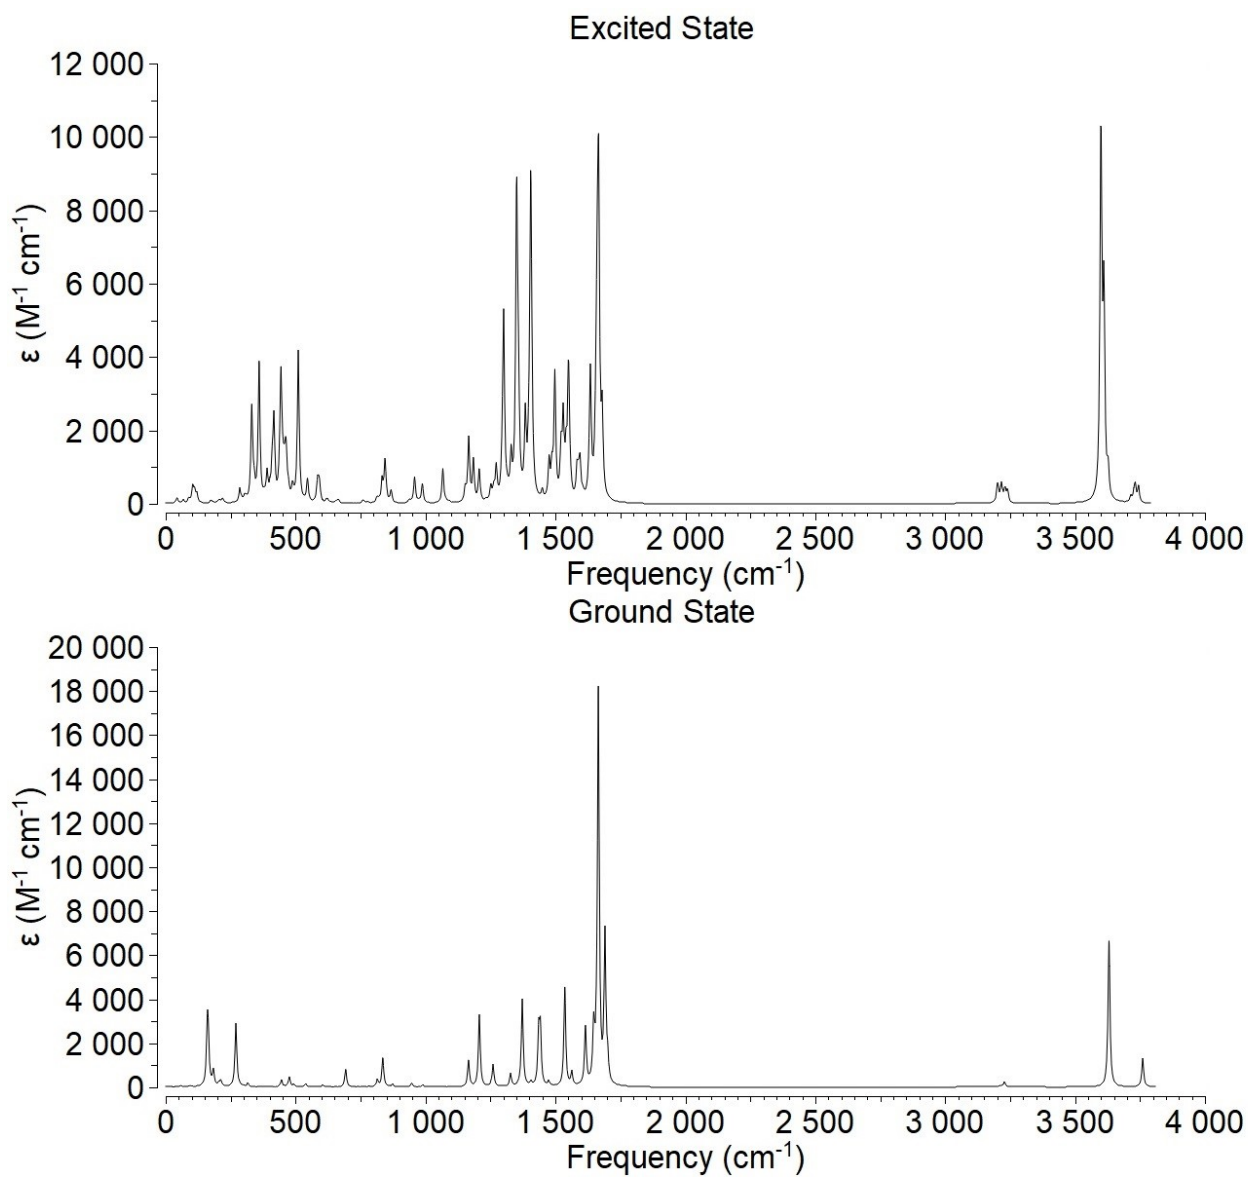

Fig. S80. Calculated vibrational spectra of PF dimer (B3PW91 functional with GD3+BJ correction)

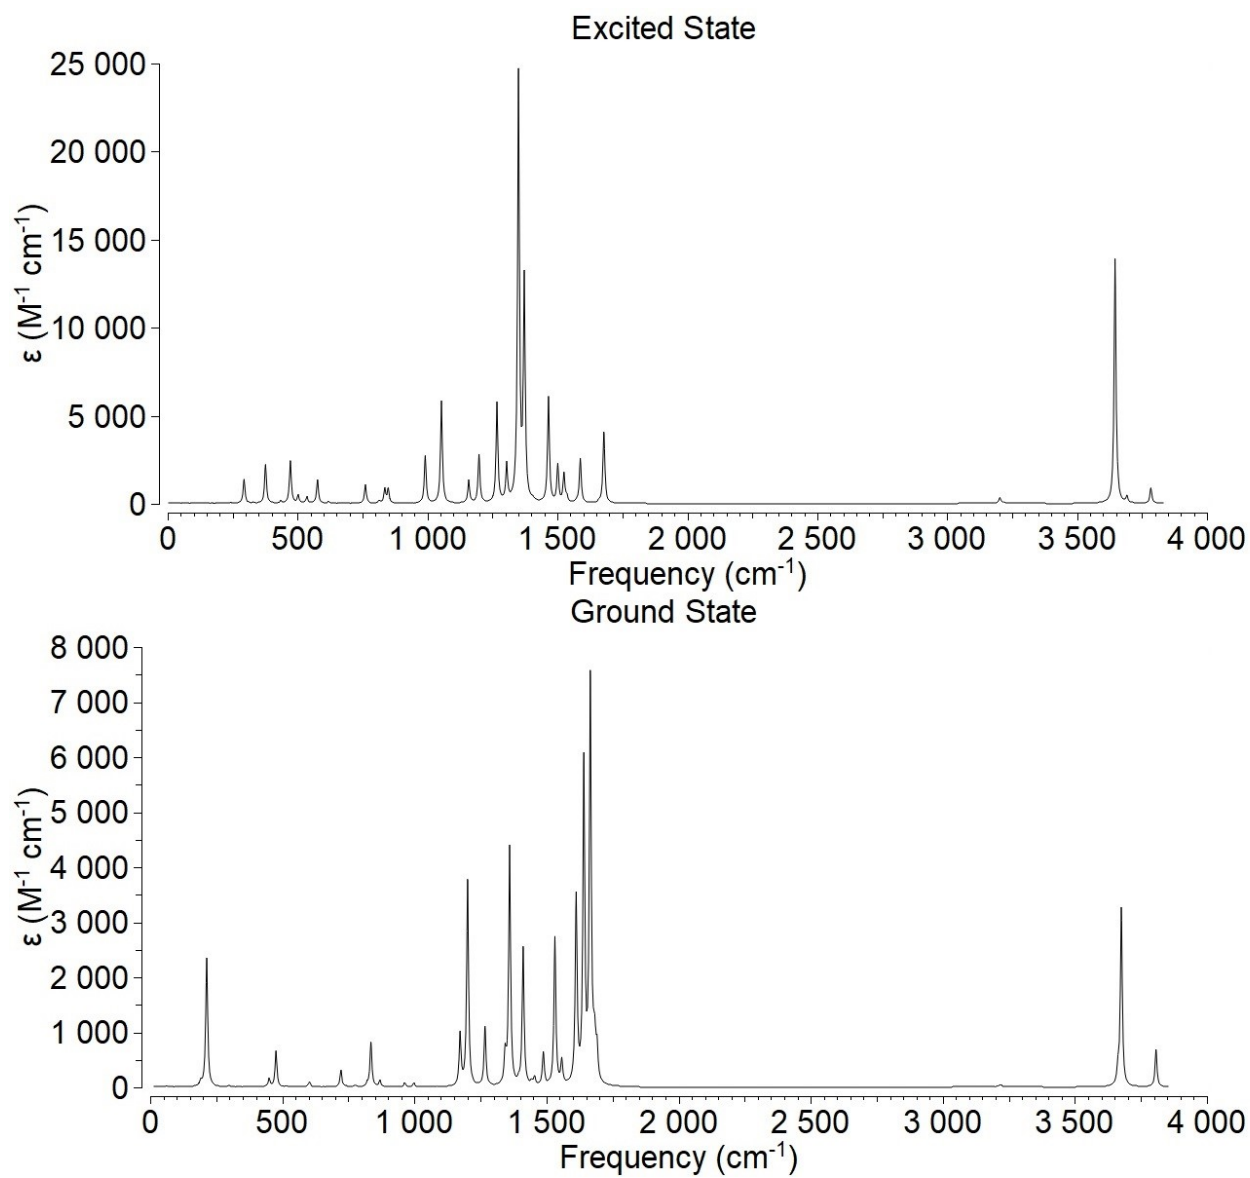

Fig. S81. Calculated vibrational spectra of PF monomer (BMK functional with GD3 correction)

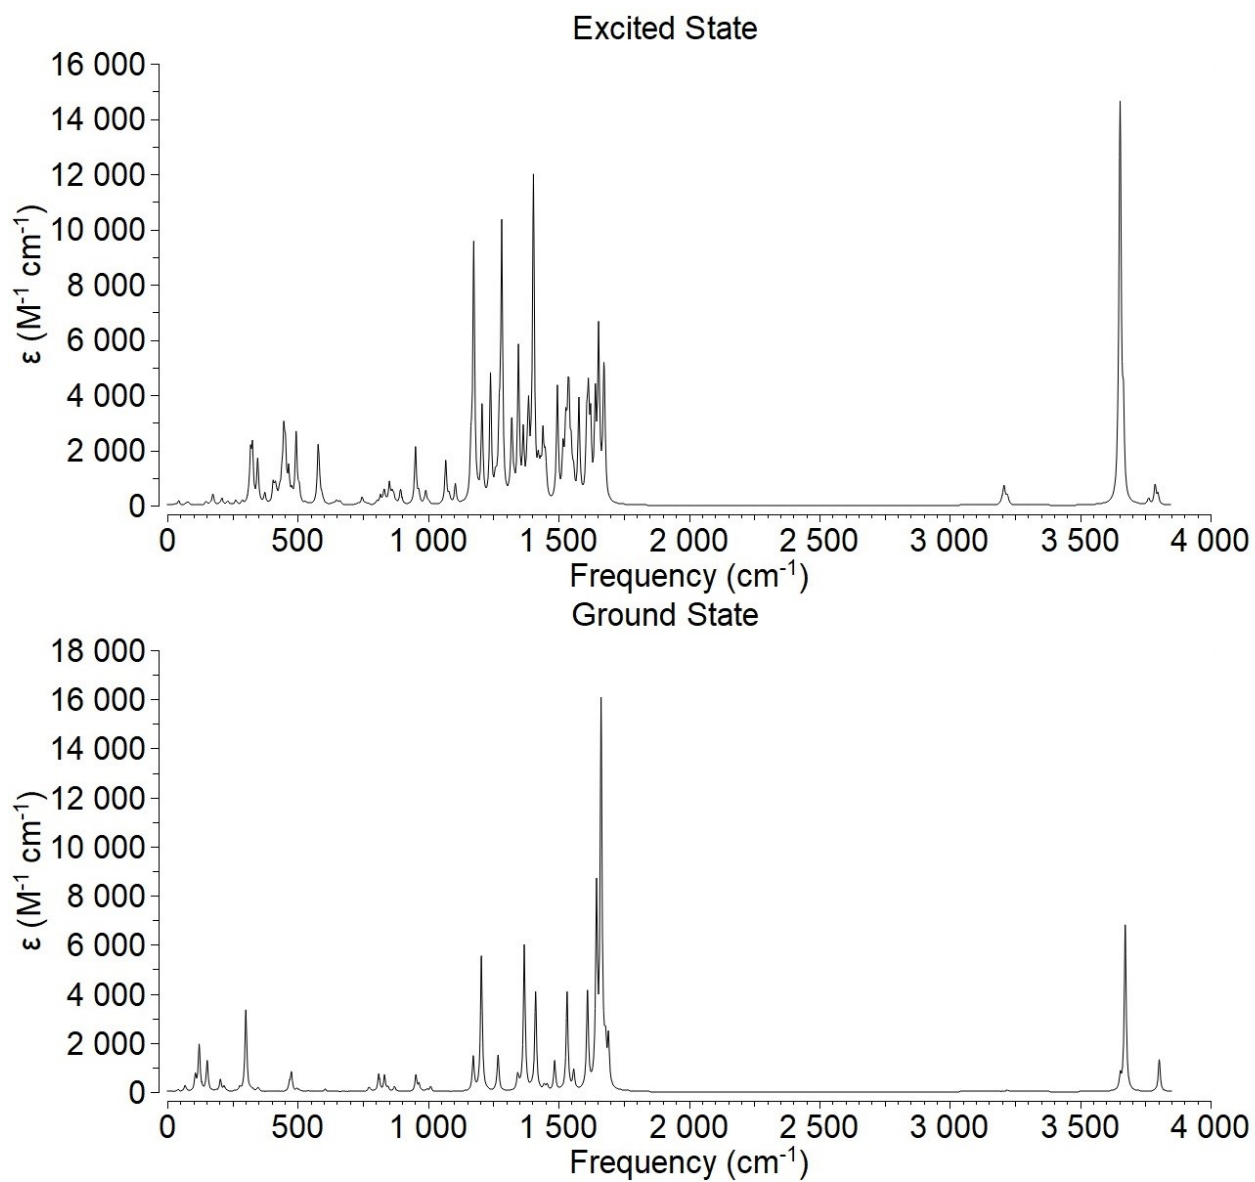

Fig. S82. Calculated vibrational spectra of PF dimer (BMK functional with GD3 correction)

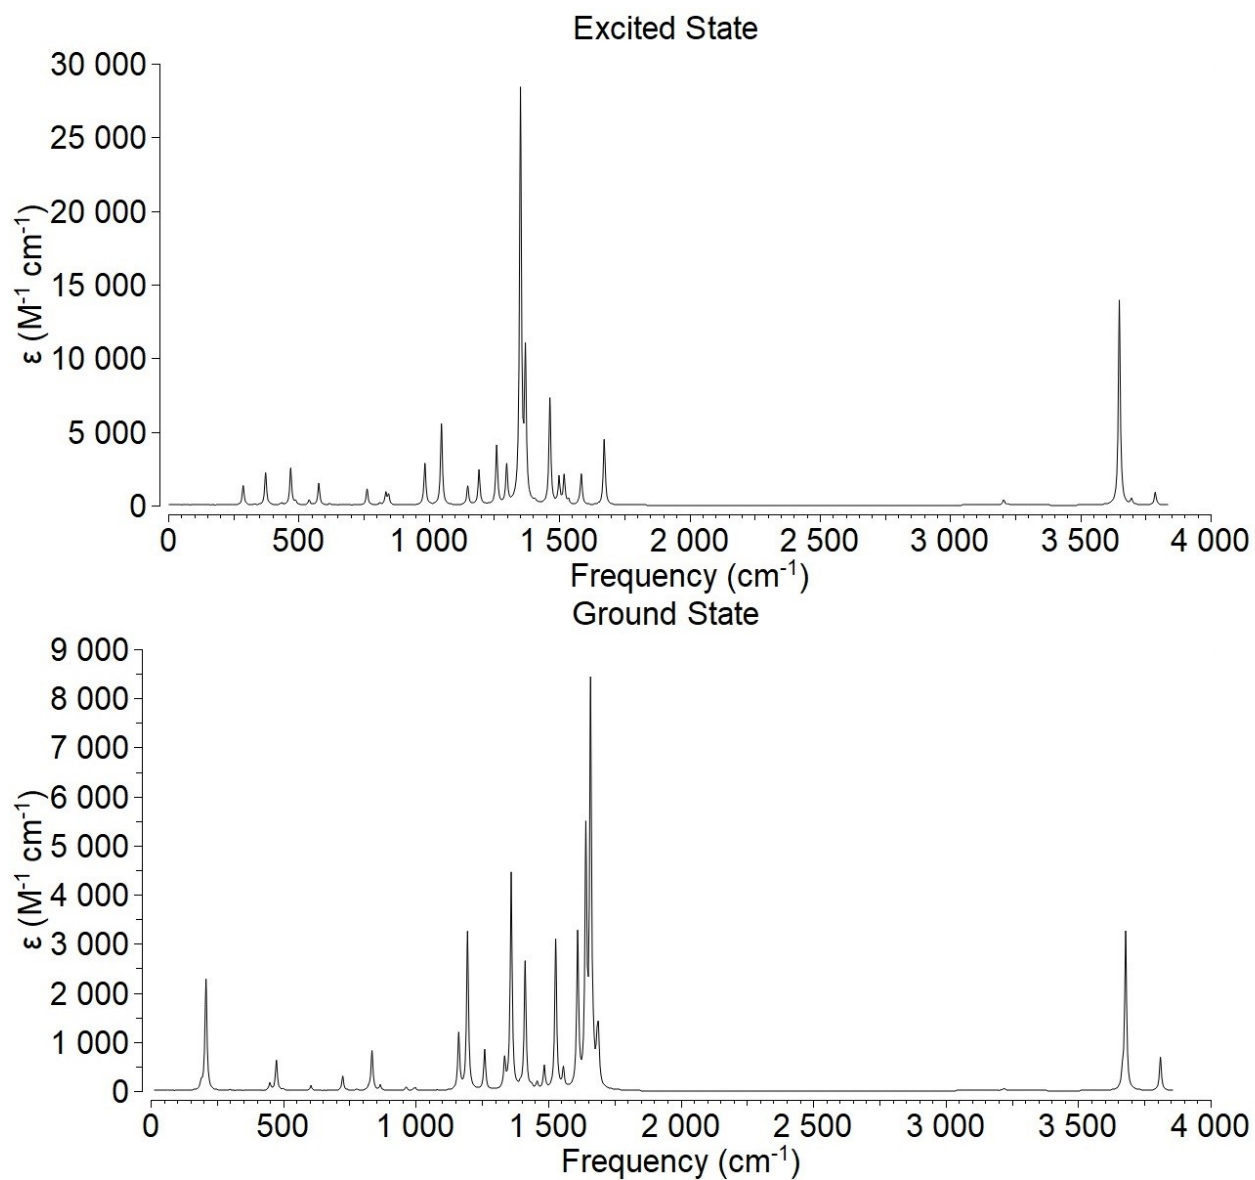

Fig. S83. Calculated vibrational spectra of PF monomer (BMK functional with GD3+BJ correction)

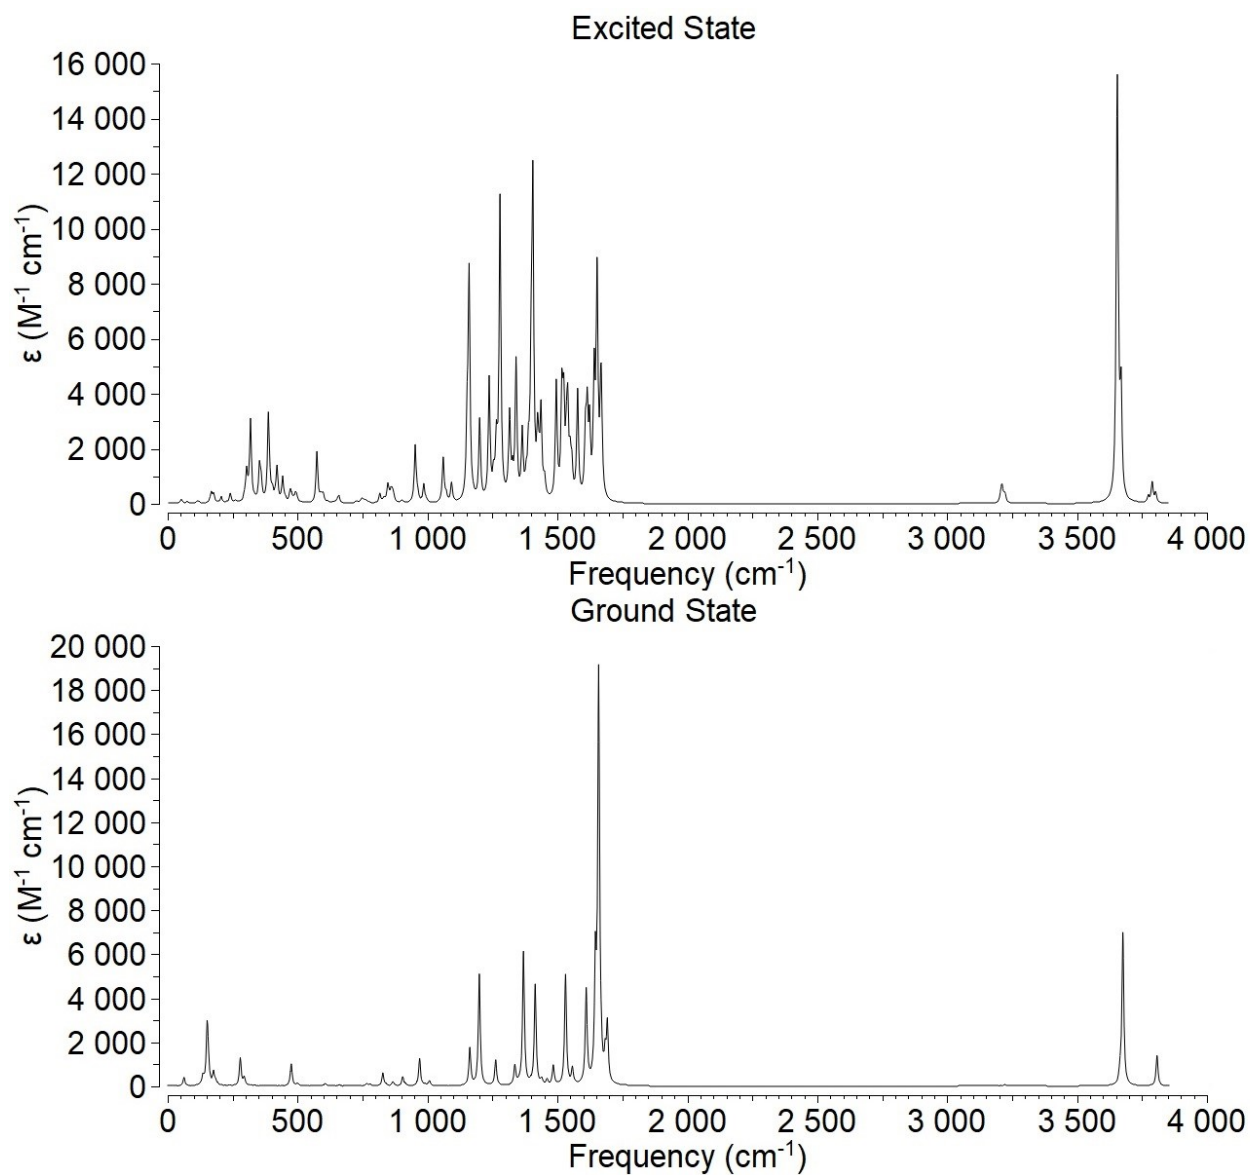

Fig. S84. Calculated vibrational spectra of PF dimer (BMK functional with GD3+BJ correction)

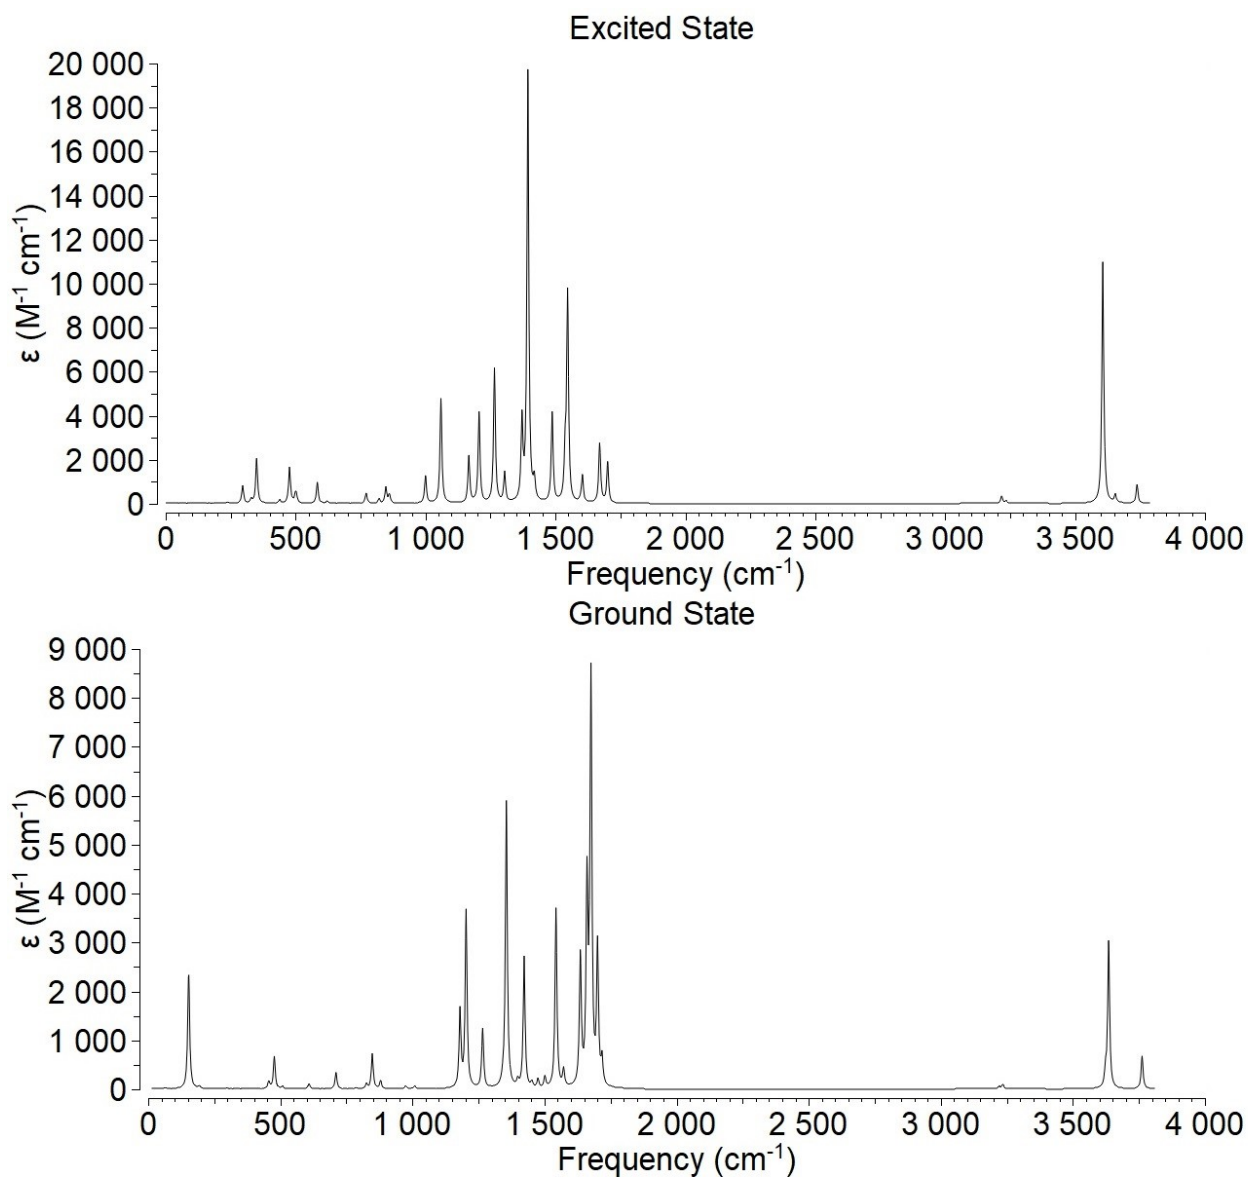

Fig. S85. Calculated vibrational spectra of PF monomer (CAM-B3LYP functional with GD3 correction)



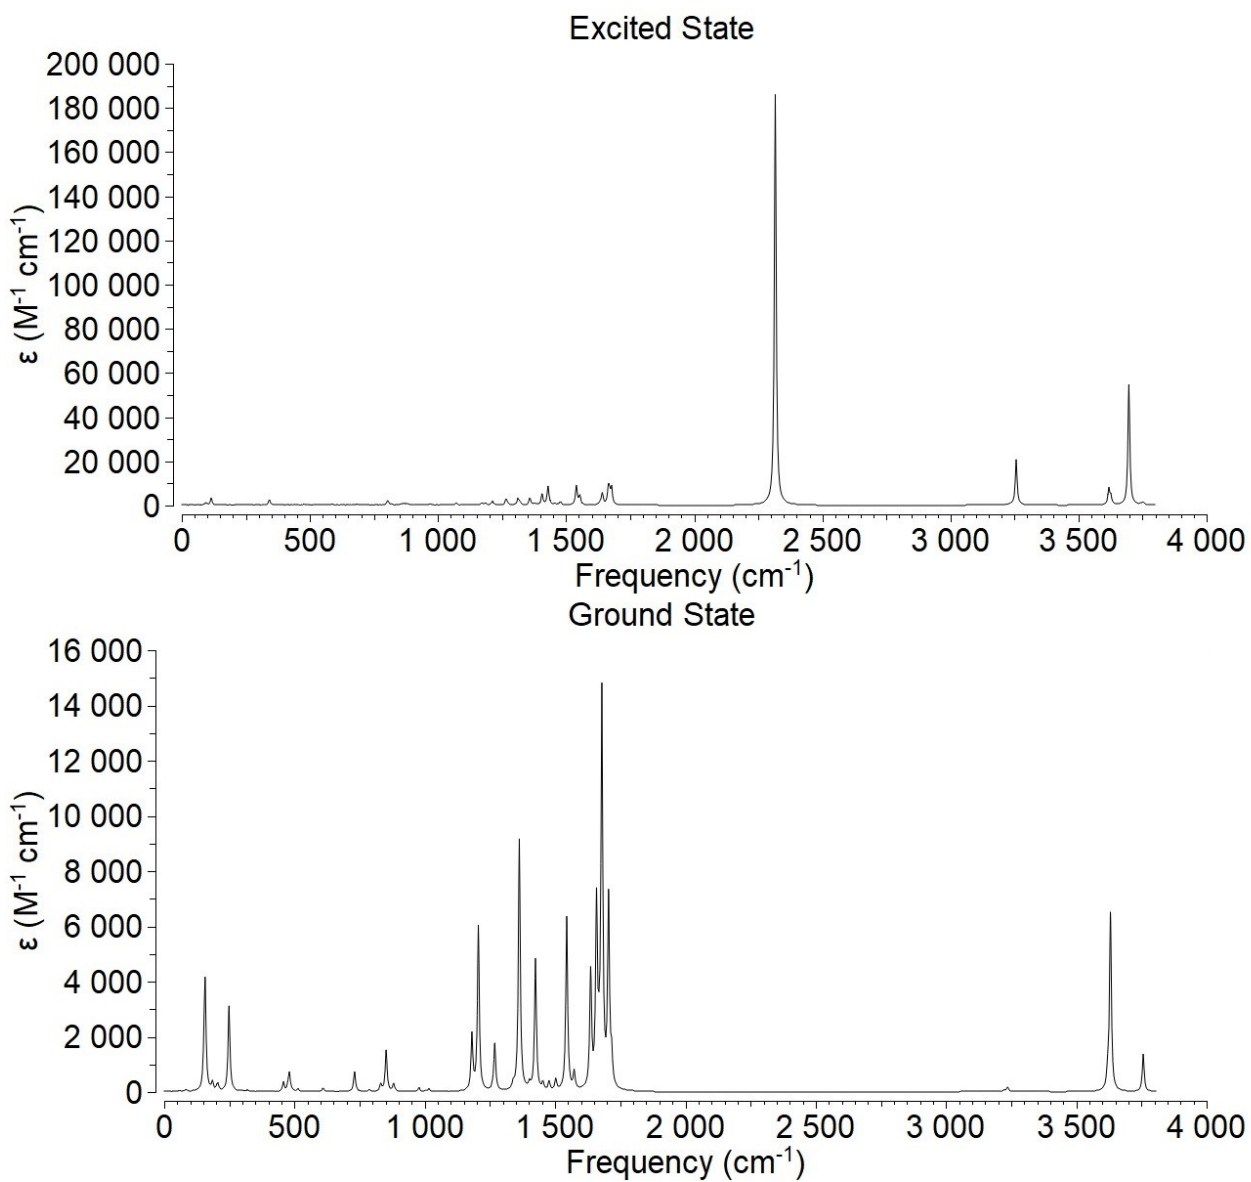

Fig. S86. Calculated vibrational spectra of PF dimer (CAM-B3LYP functional with GD3 correction)

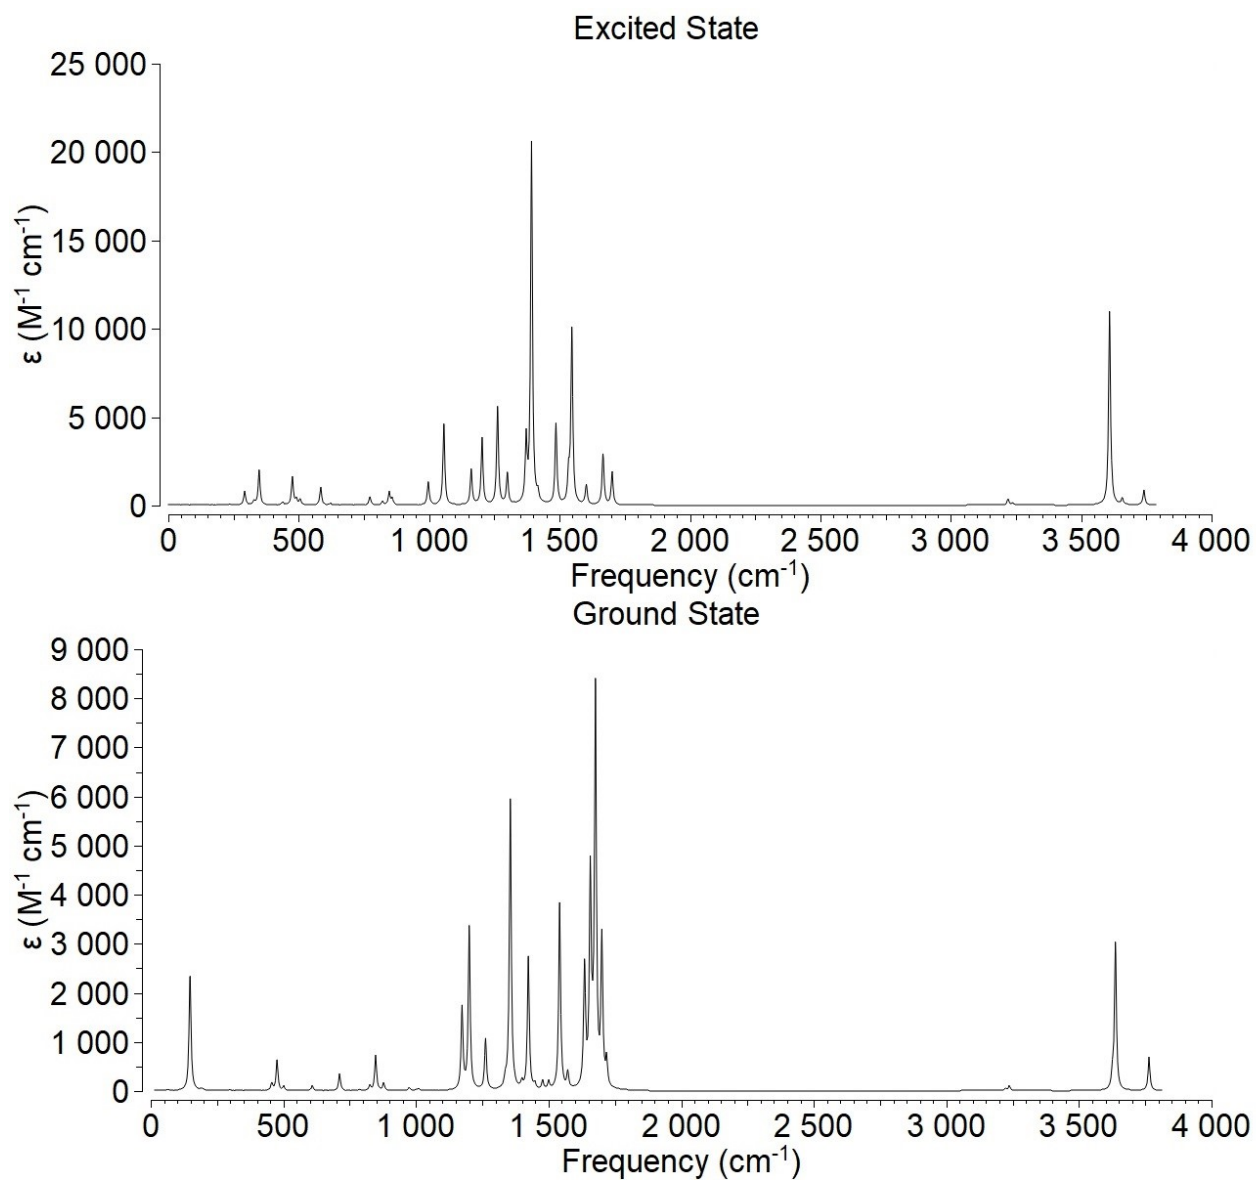

Fig. S87. Calculated vibrational spectra of PF monomer (CAM-B3LYP functional with GD3+BJ correction)

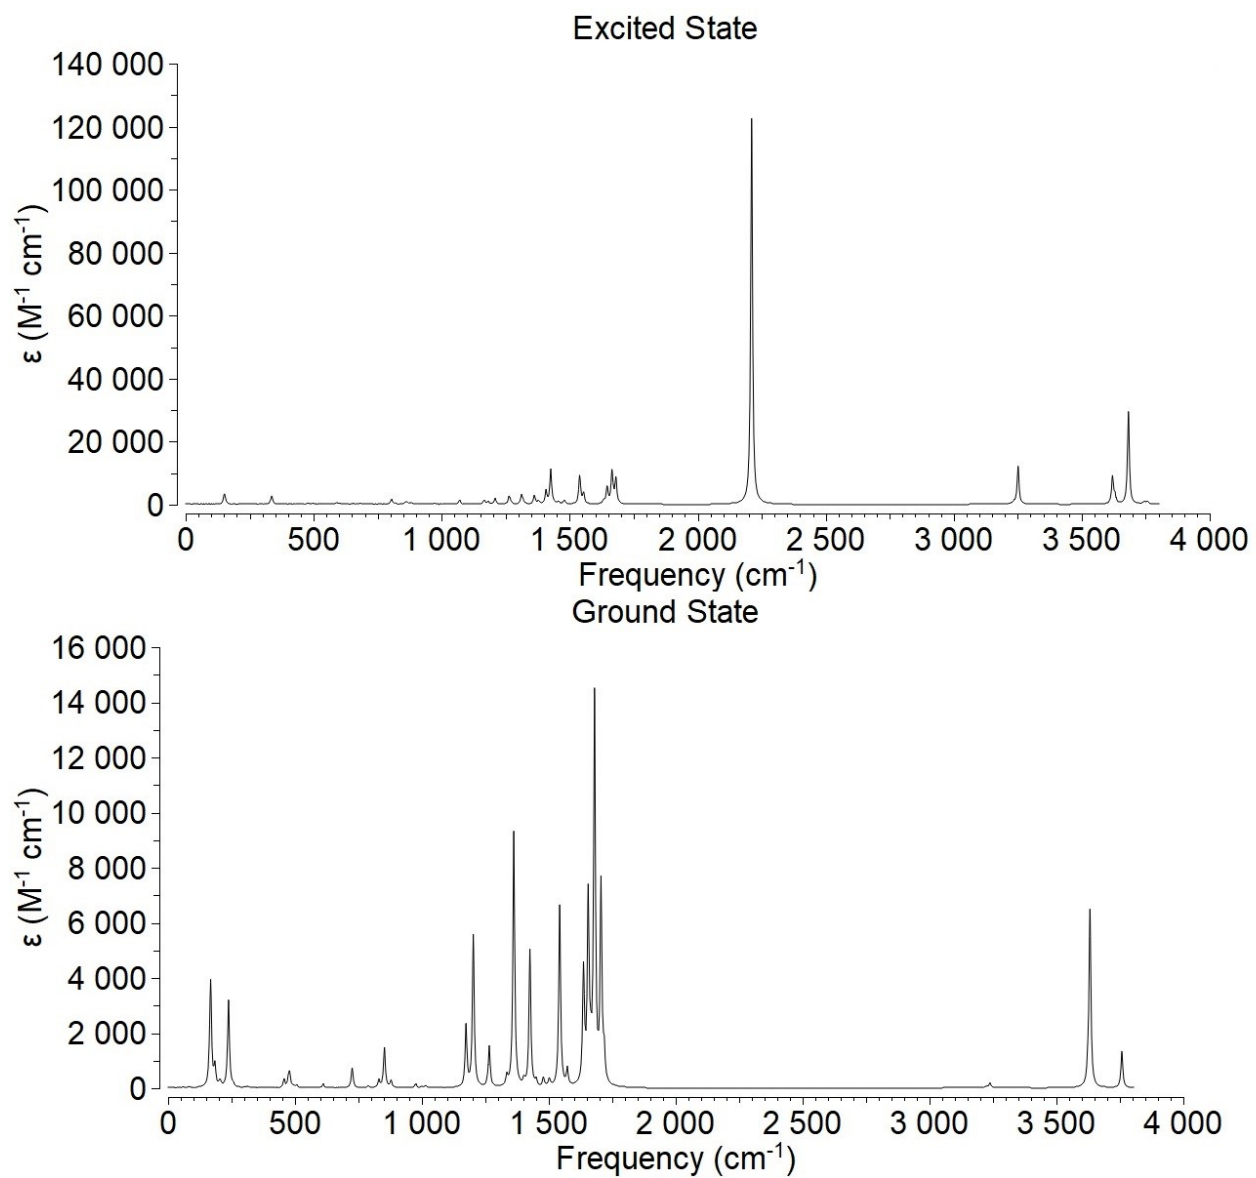

Fig. S88. Calculated vibrational spectra of PF dimer (CAM-B3LYP functional with GD3+BJ correction)

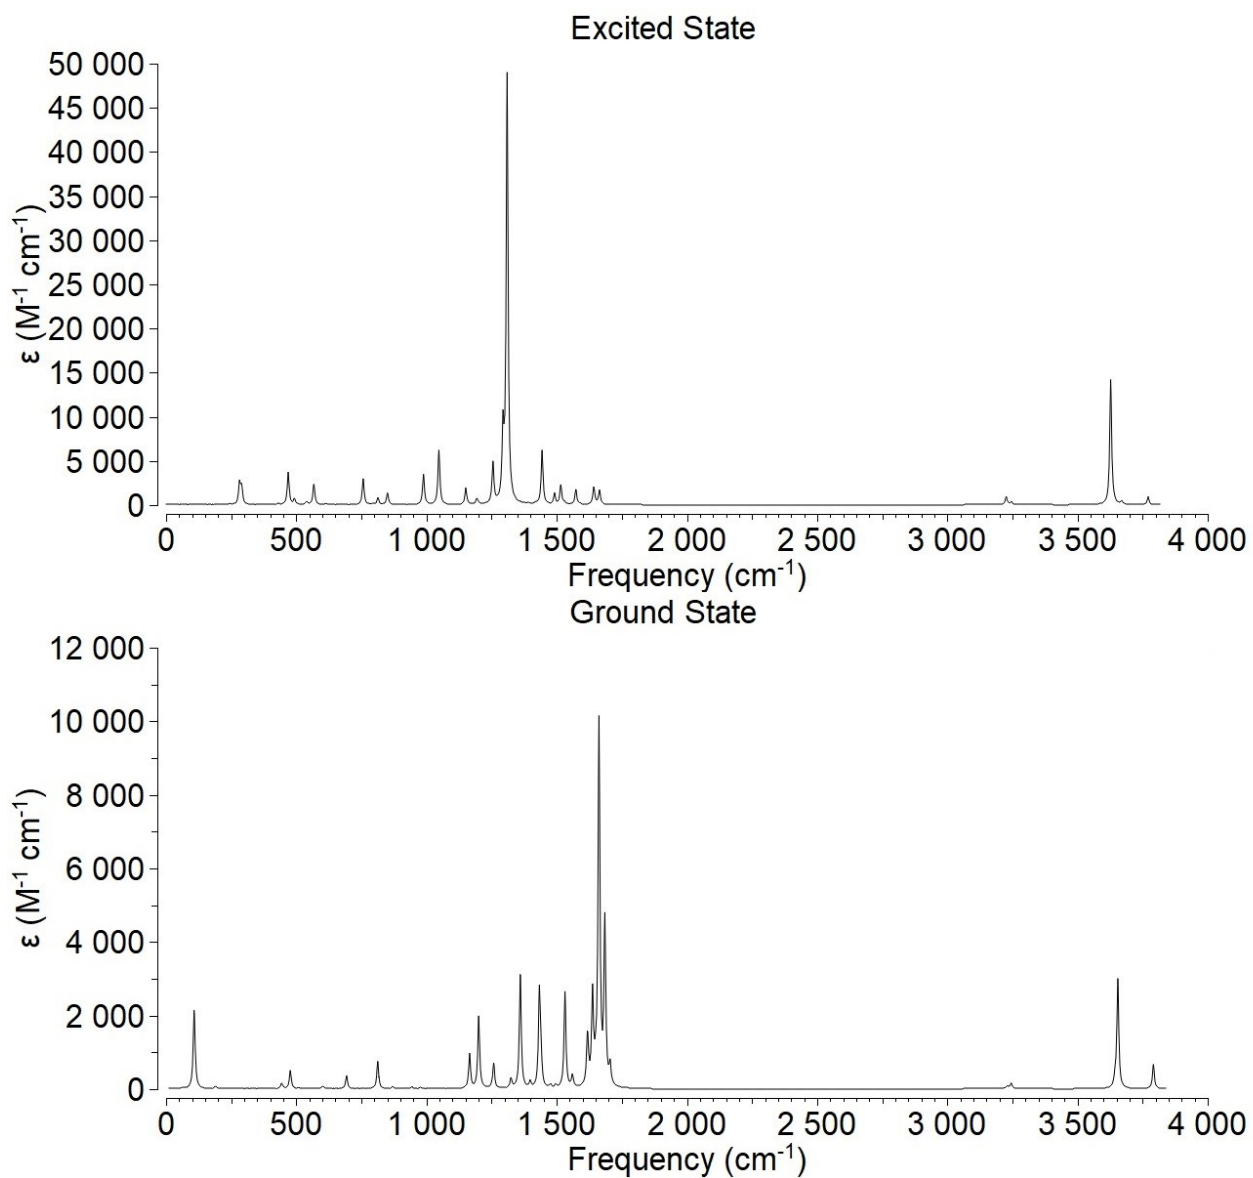

Fig. S89. Calculated vibrational spectra of PF monomer (M05 functional with GD3 correction)

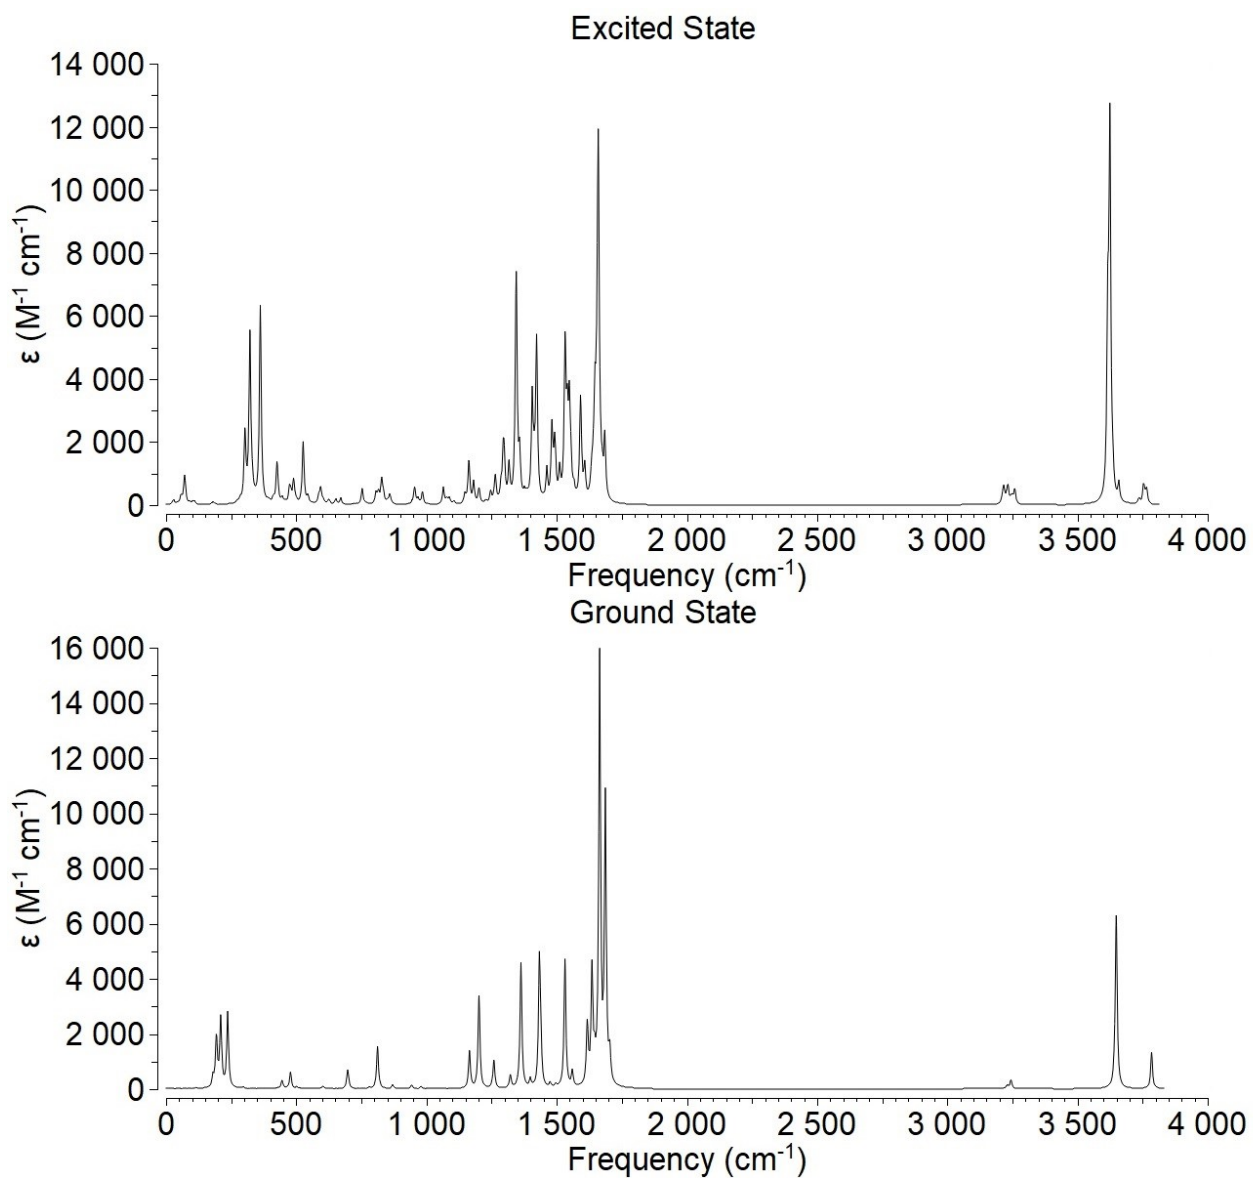

Fig. S90. Calculated vibrational spectra of PF dimer (M05 functional with GD3 correction)

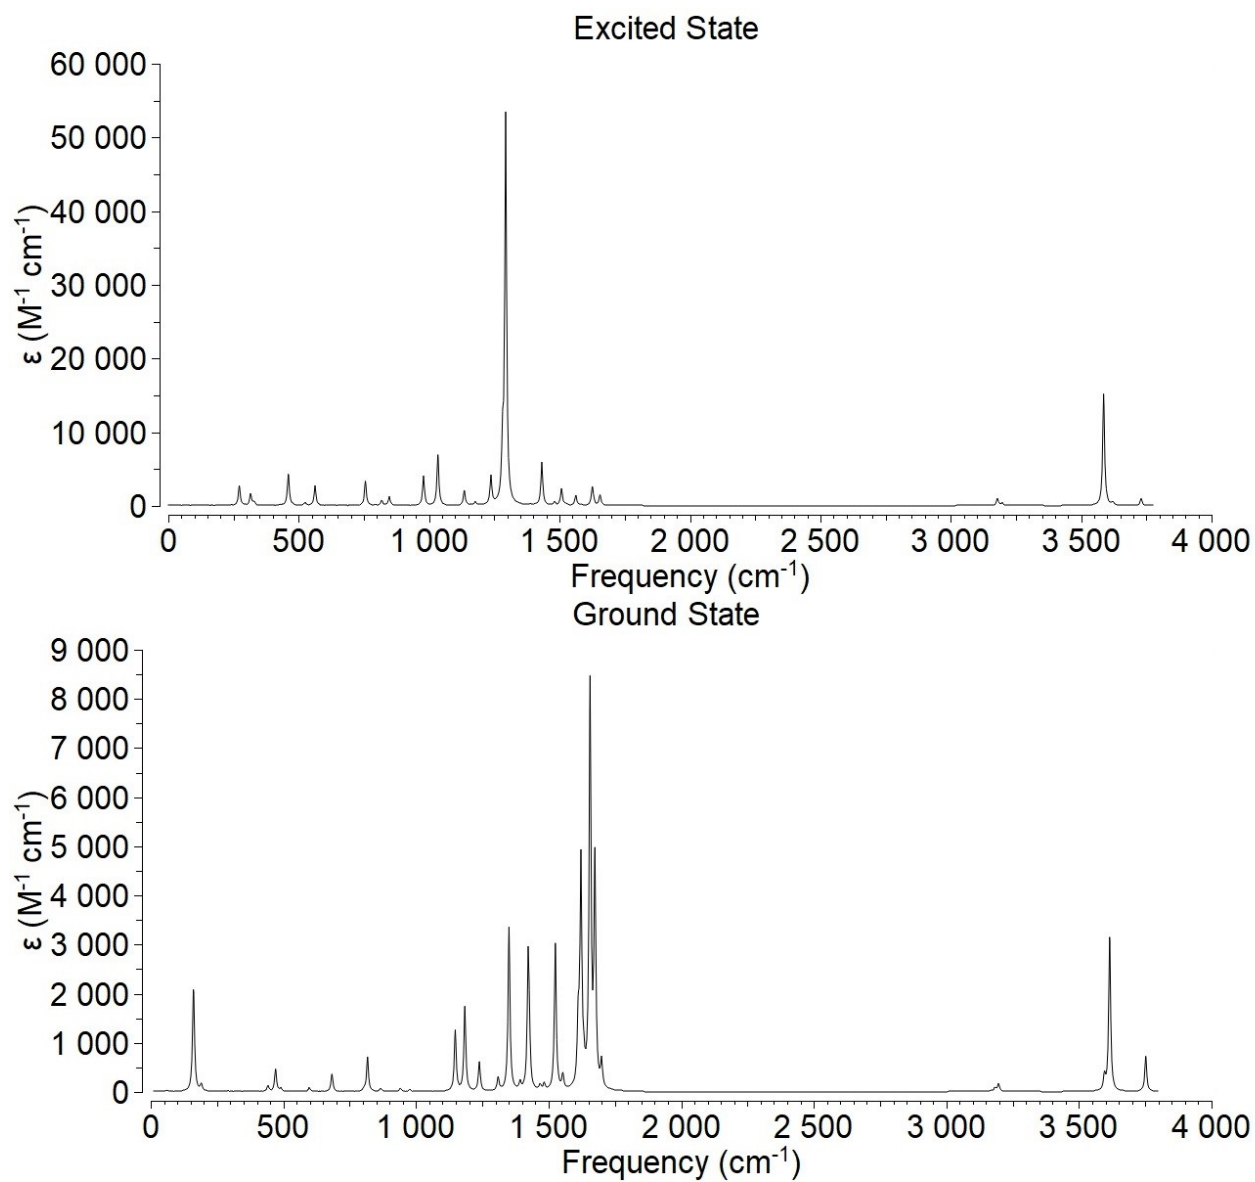

Fig. S91. Calculated vibrational spectra of PF monomer (M06 functional)

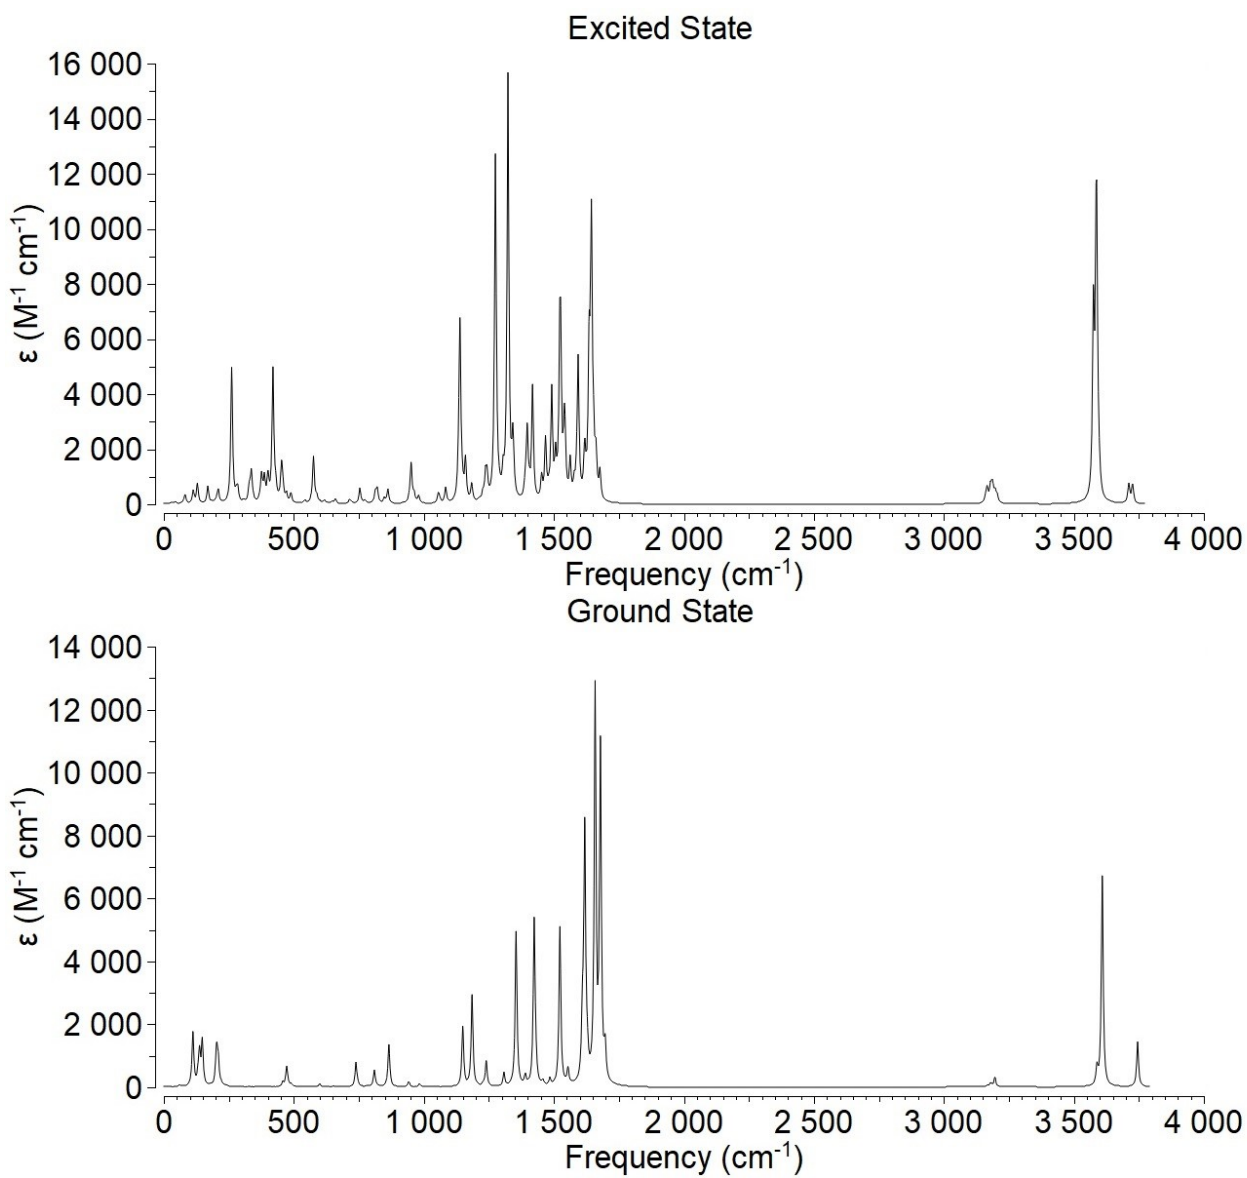

Fig. S92. Calculated vibrational spectra of PF dimer (M06 functional)



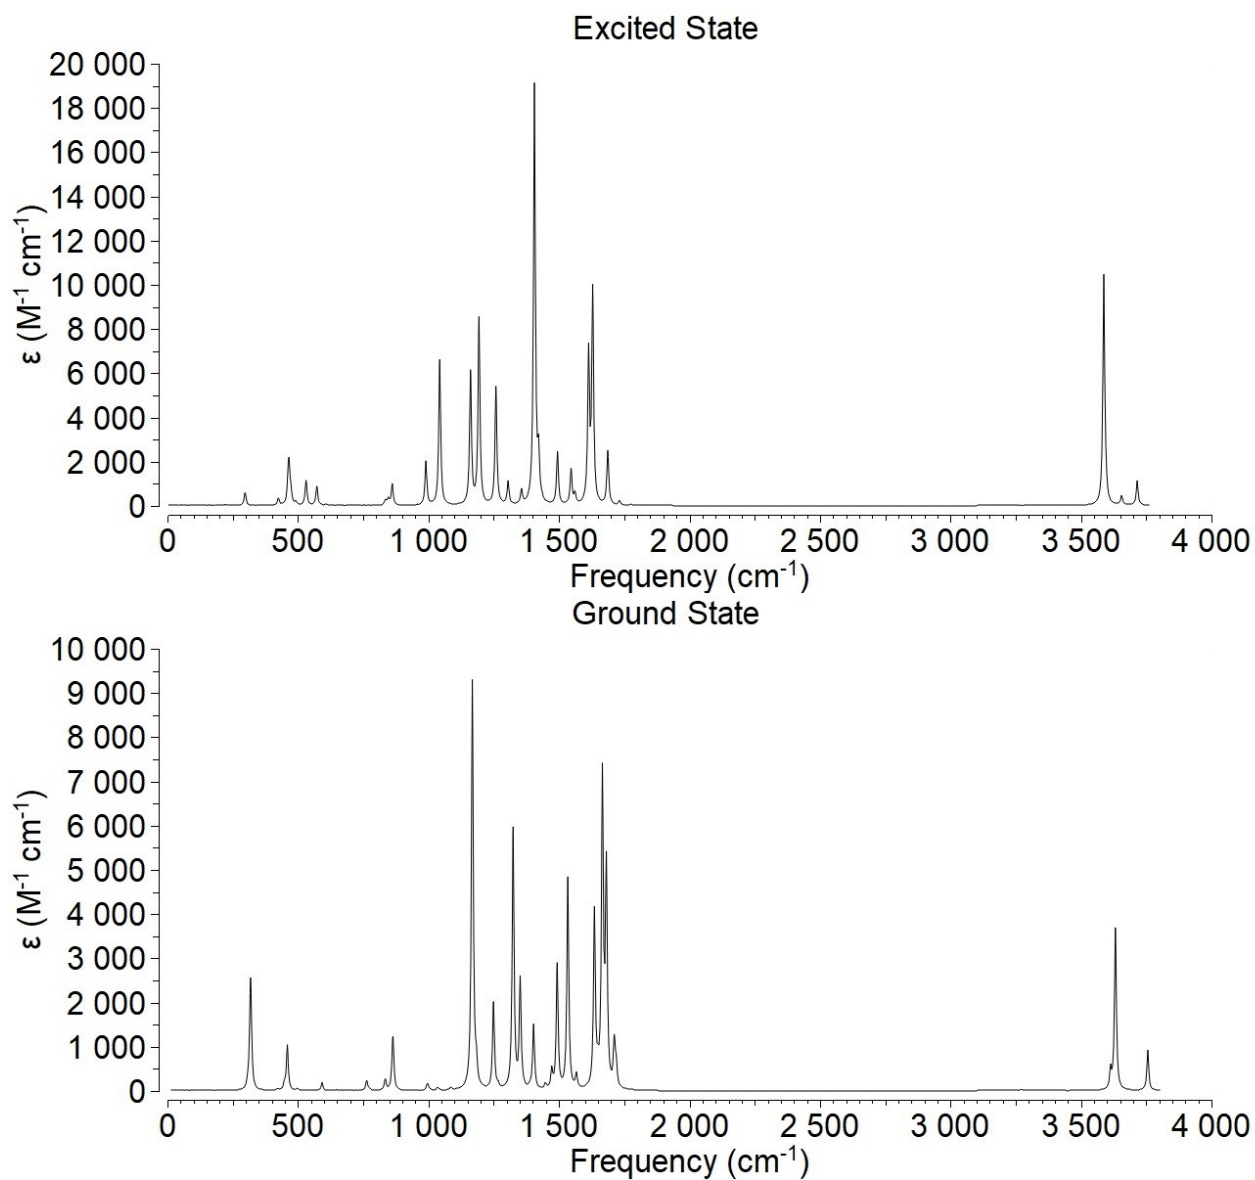

Fig. S93. Calculated vibrational spectra of PF monomer (M06HF functional)

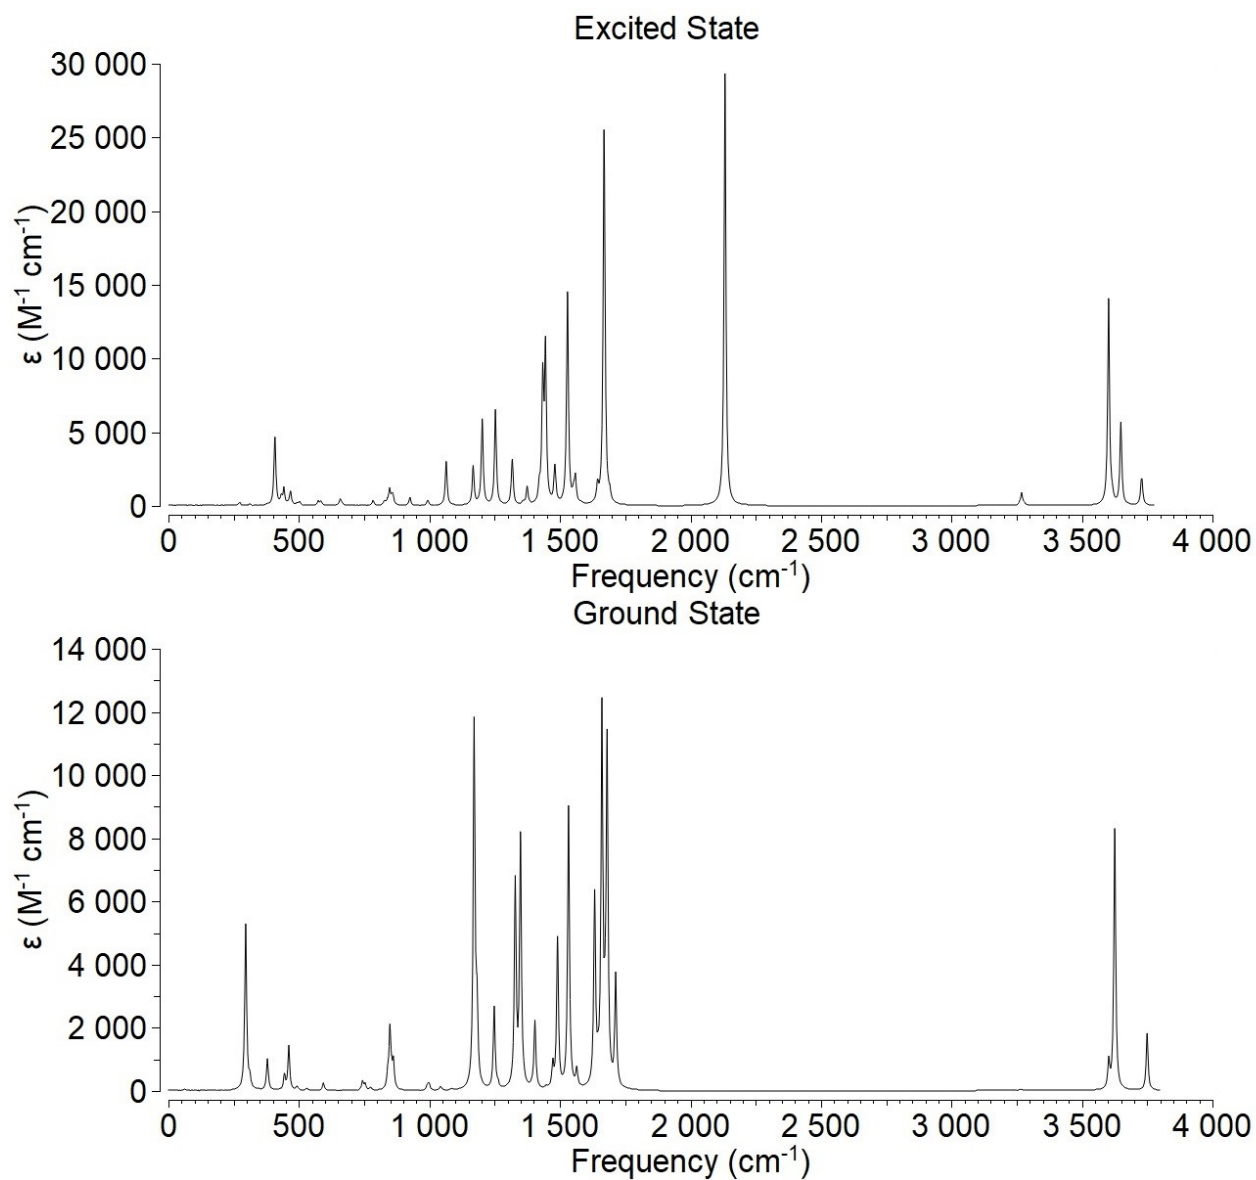

Fig. S94. Calculated vibrational spectra of PF dimer (M06HF functional)

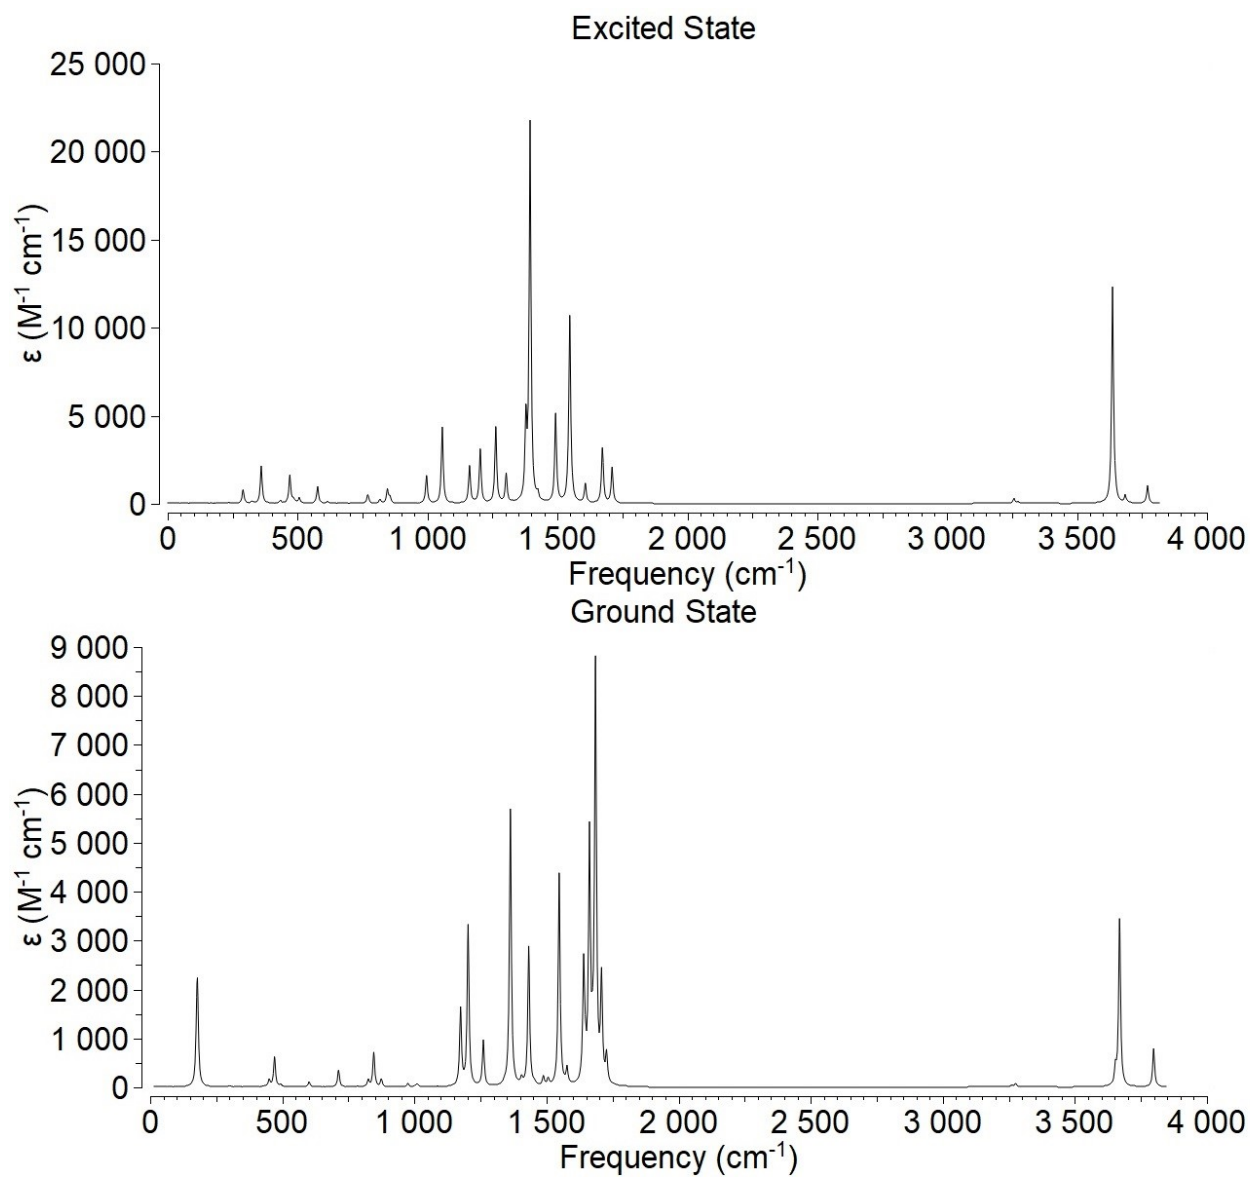

Fig. S95. Calculated vibrational spectra of PF monomer (M052X functional)

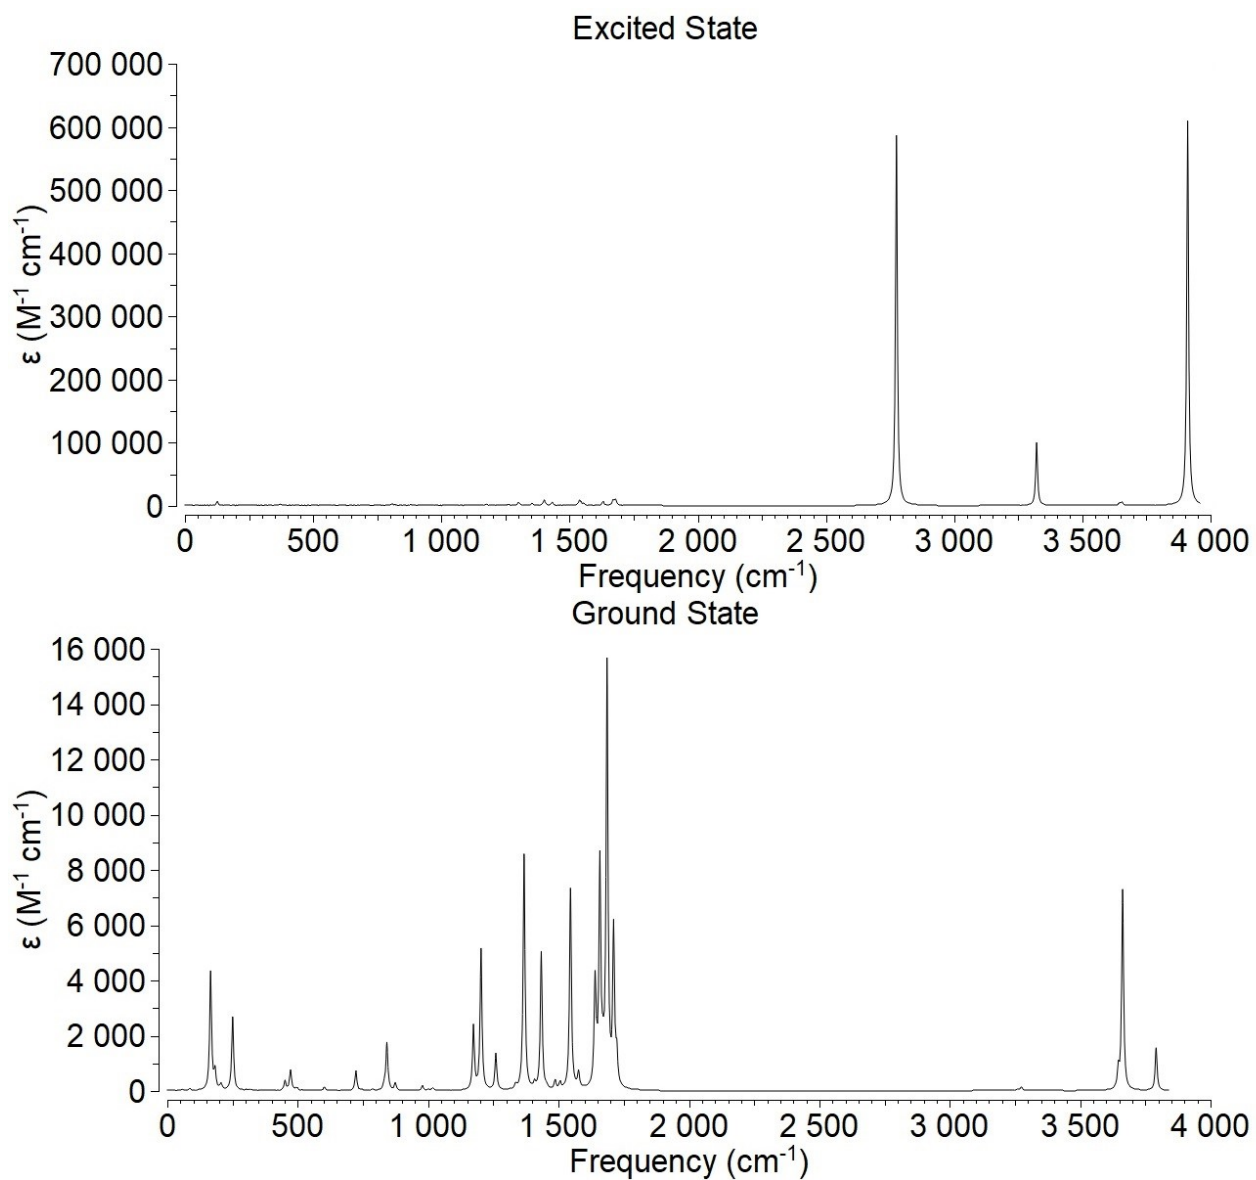

Fig. S96. Calculated vibrational spectra of PF dimer (M052X functional)

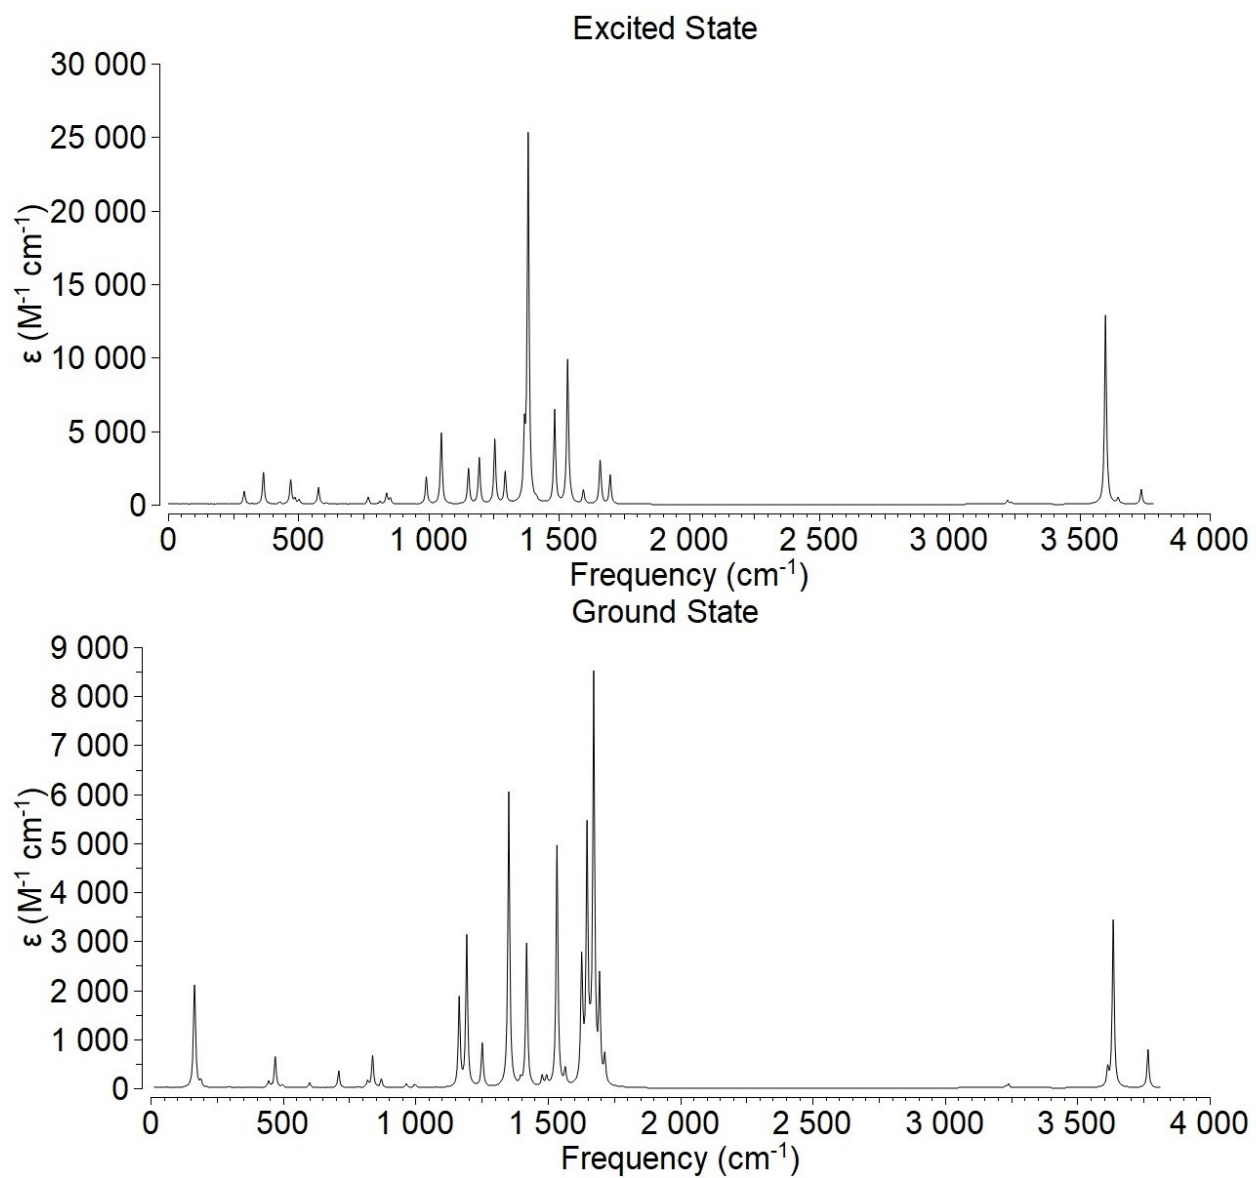

Fig. S97. Calculated vibrational spectra of PF monomer (M062X functional)

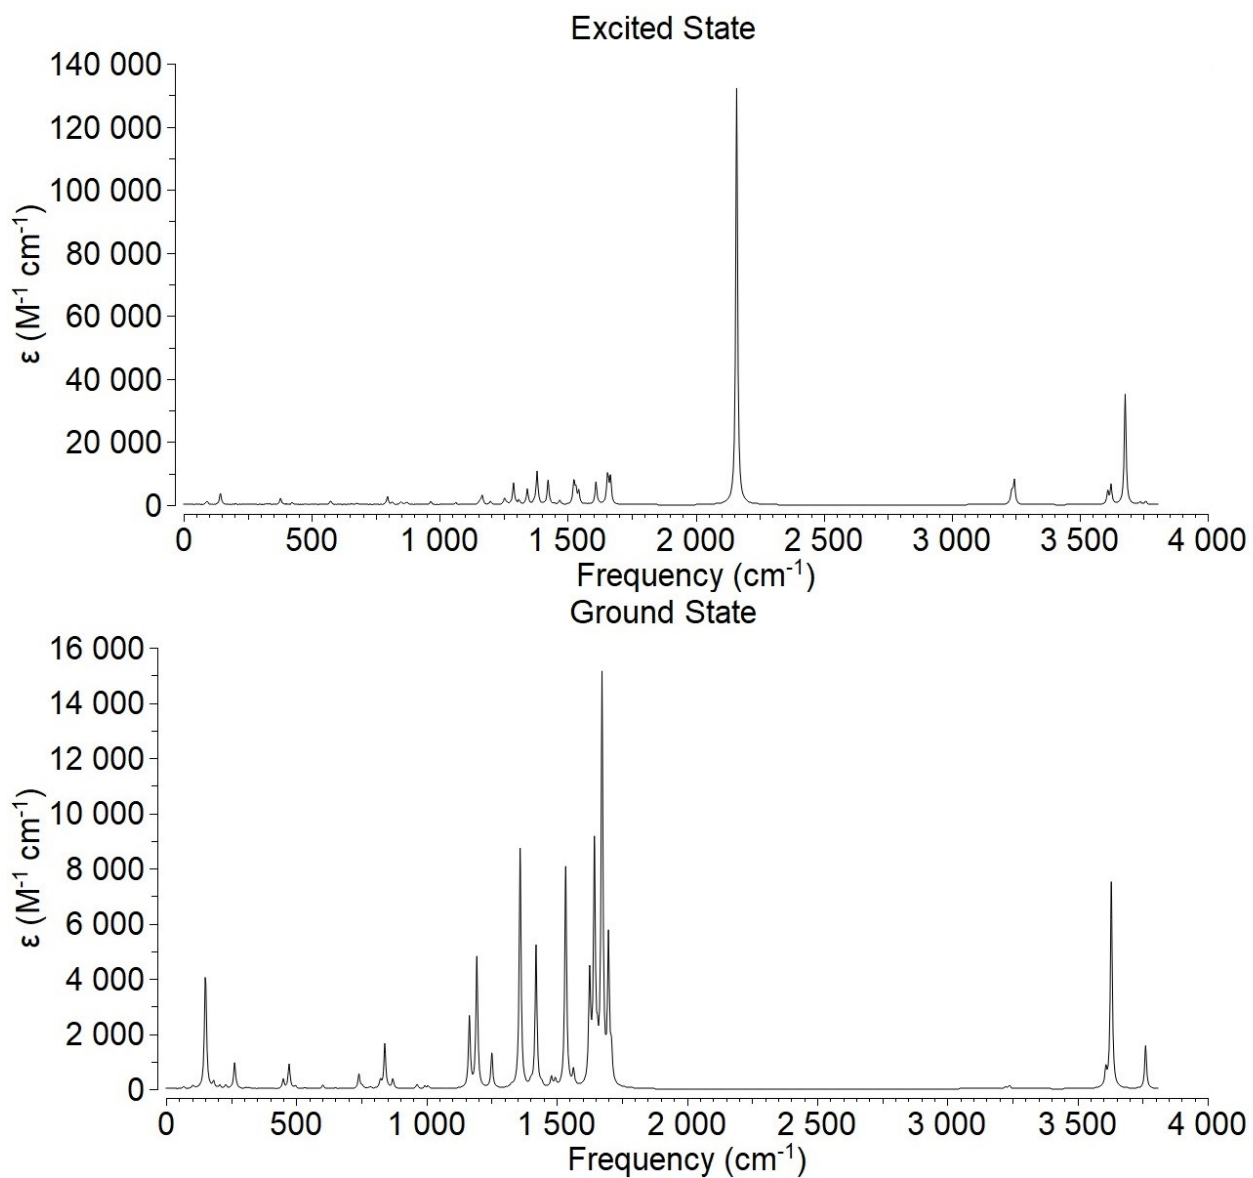

Fig. S98. Calculated vibrational spectra of PF dimer (M062X functional)

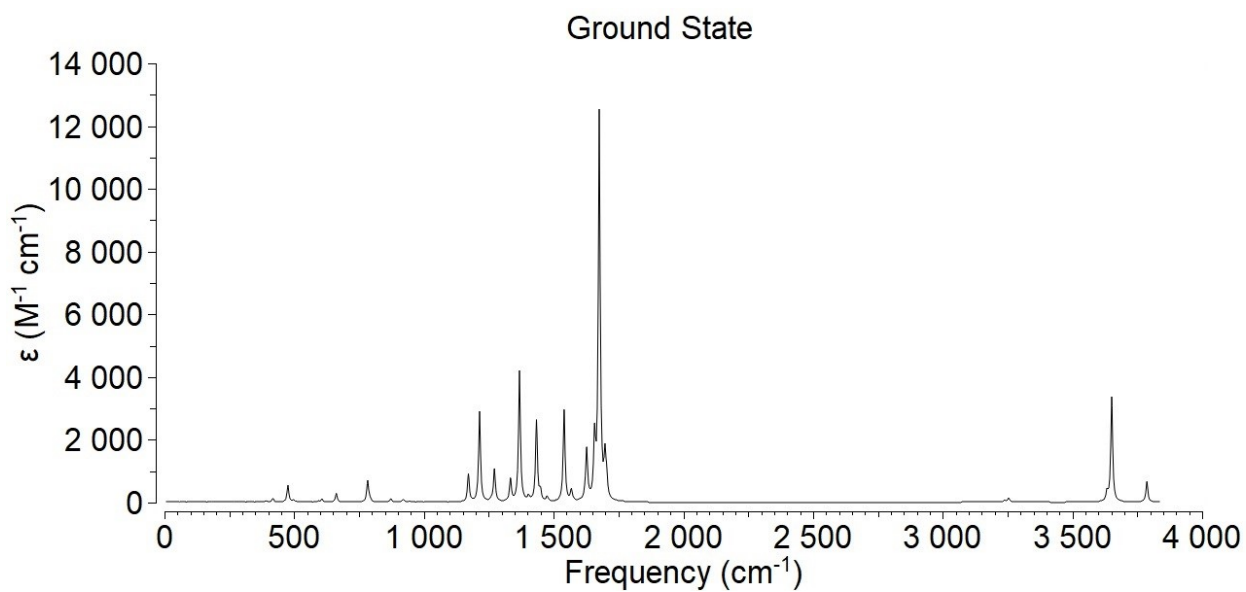

Fig. S99. Calculated vibrational spectra of PF monomer (mPW2PLYP functional with GD3 correction)

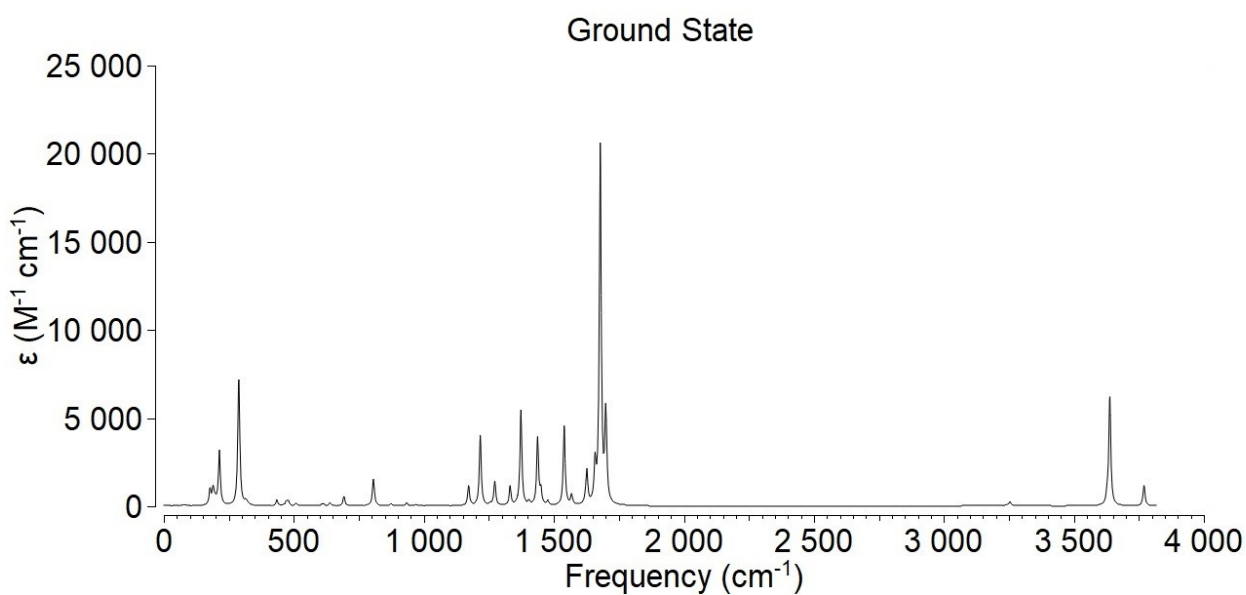

Fig. S100. Calculated vibrational spectra of PF dimer (mPW2PLYP functional with GD3 correction)



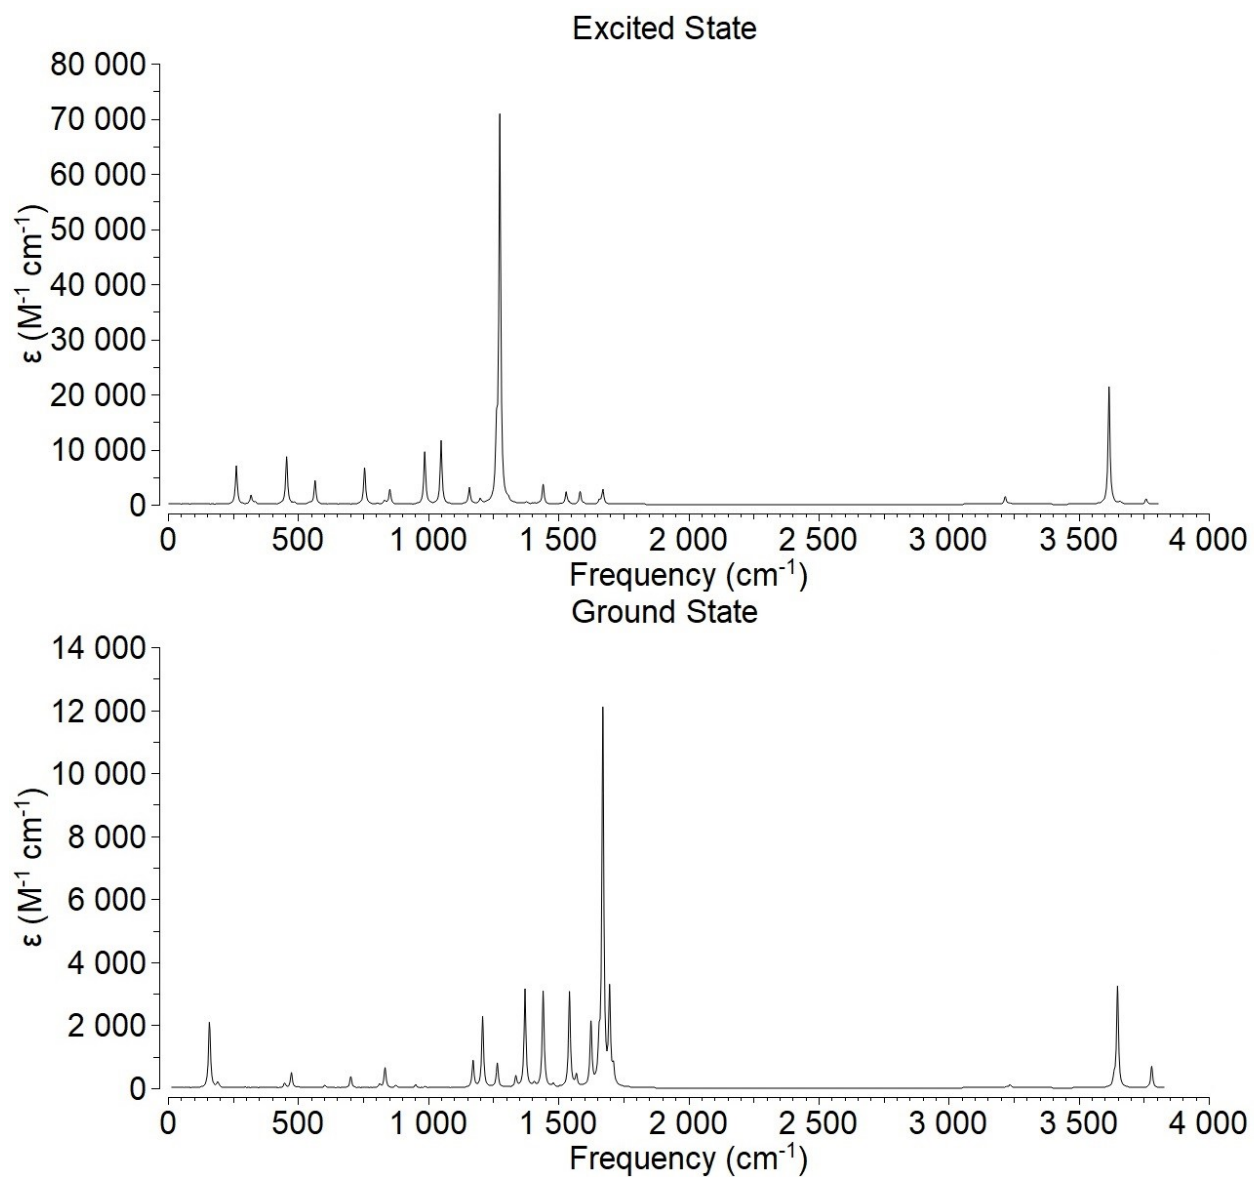

Fig. S101. Calculated vibrational spectra of PF monomer (PBE0 functional with GD3 correction)

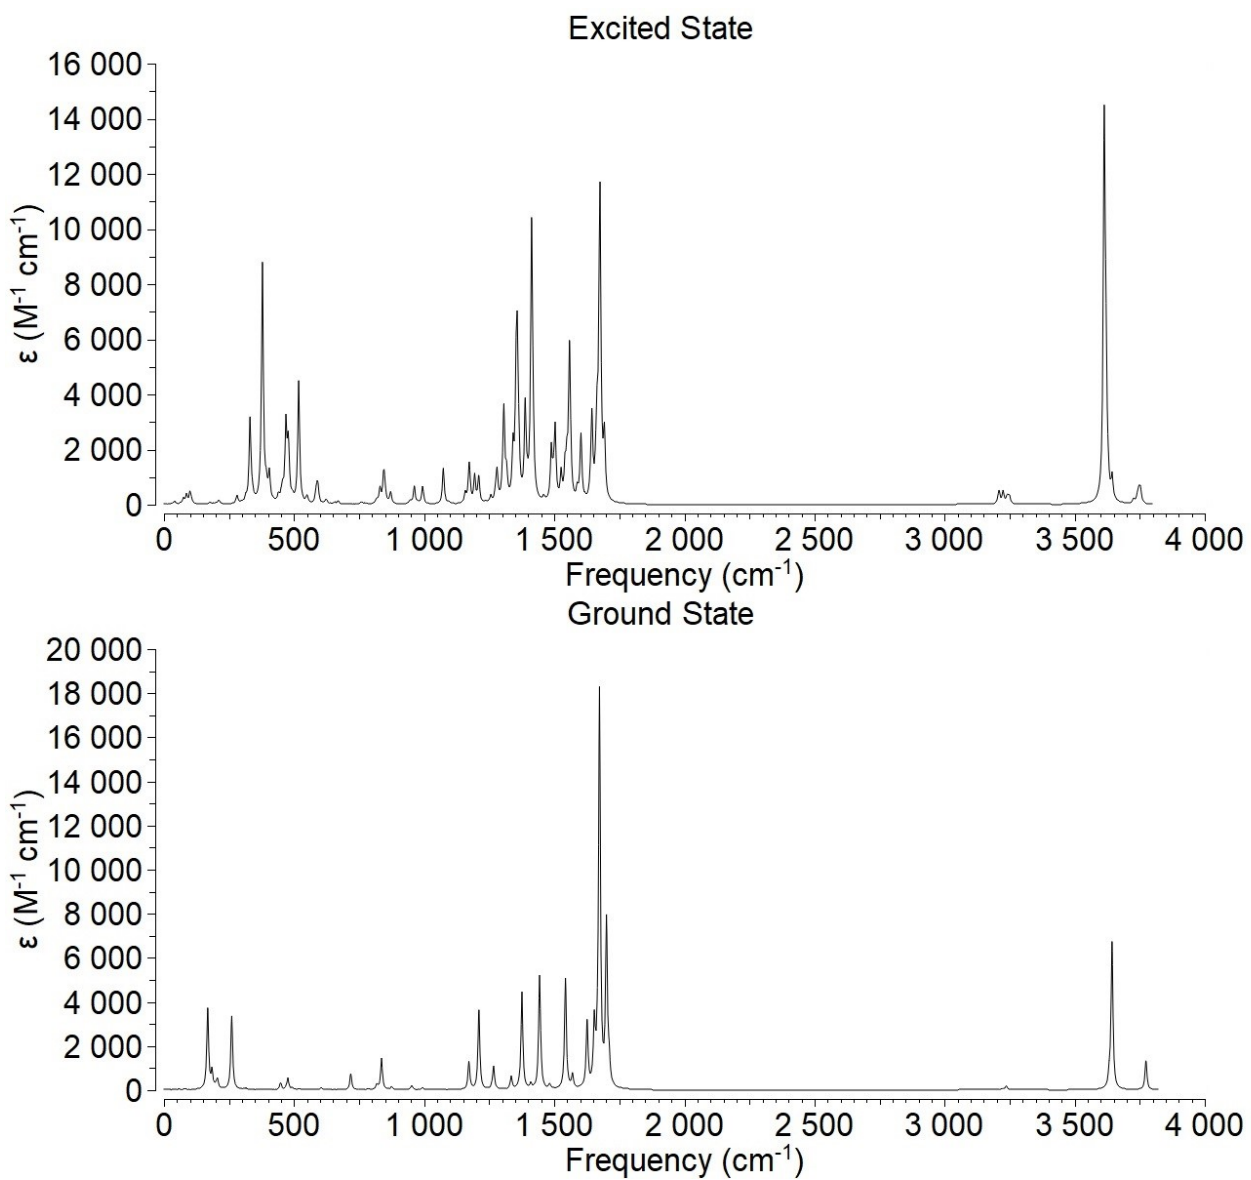

Fig. S102. Calculated vibrational spectra of PF dimer (PBE0 functional with GD3 correction)

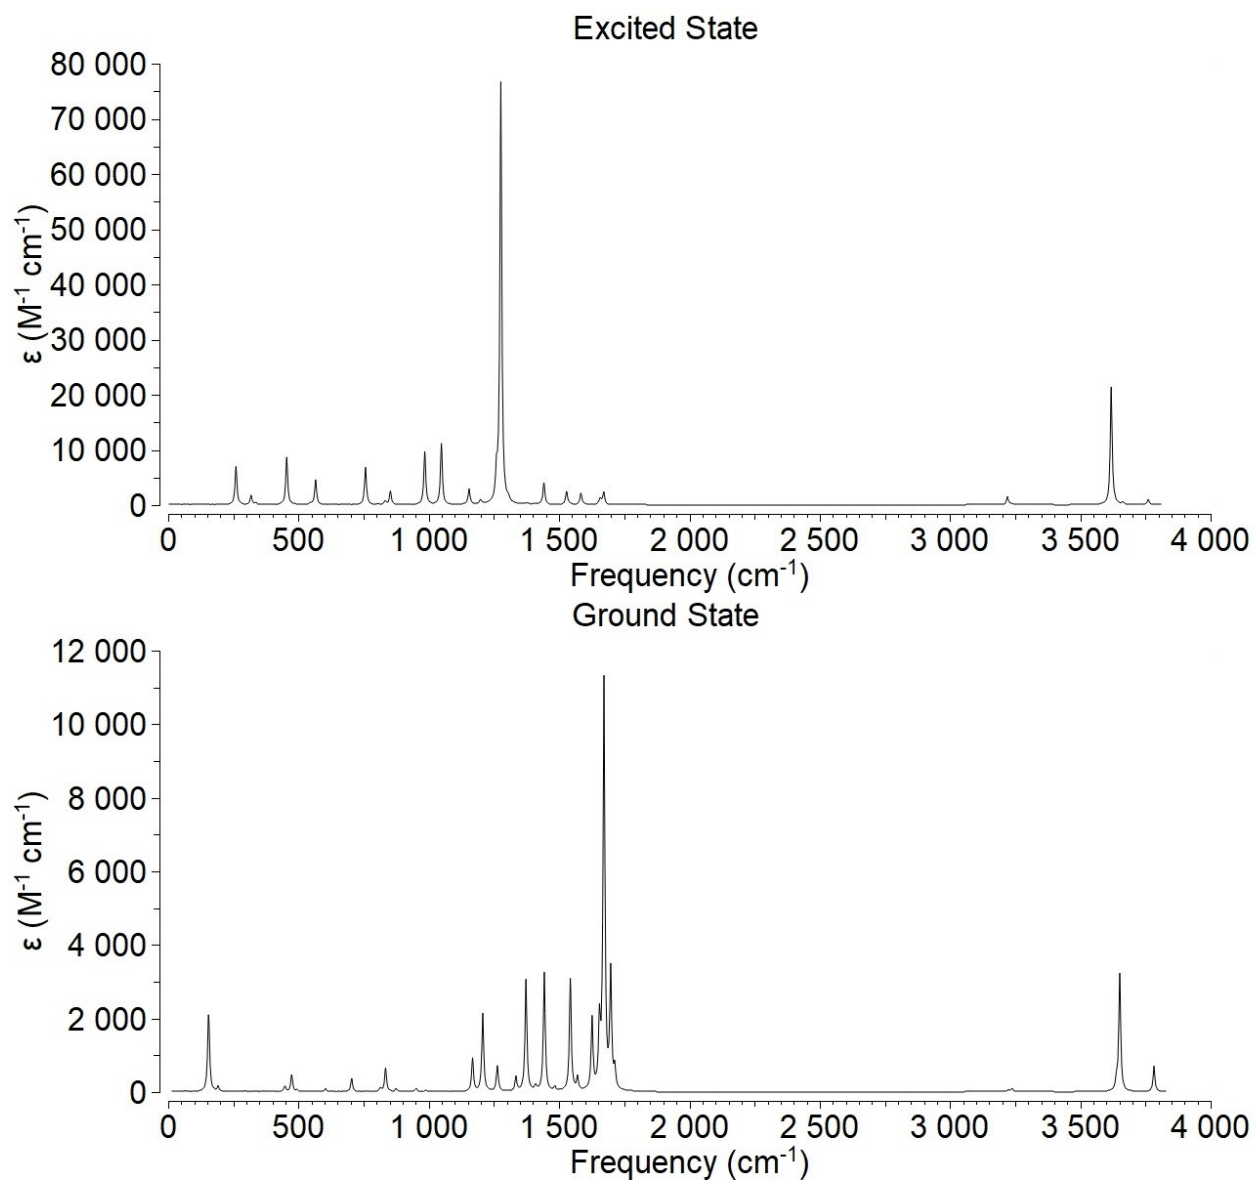

Fig. S103. Calculated vibrational spectra of PF monomer (PBE0 functional with GD3+BJ correction)

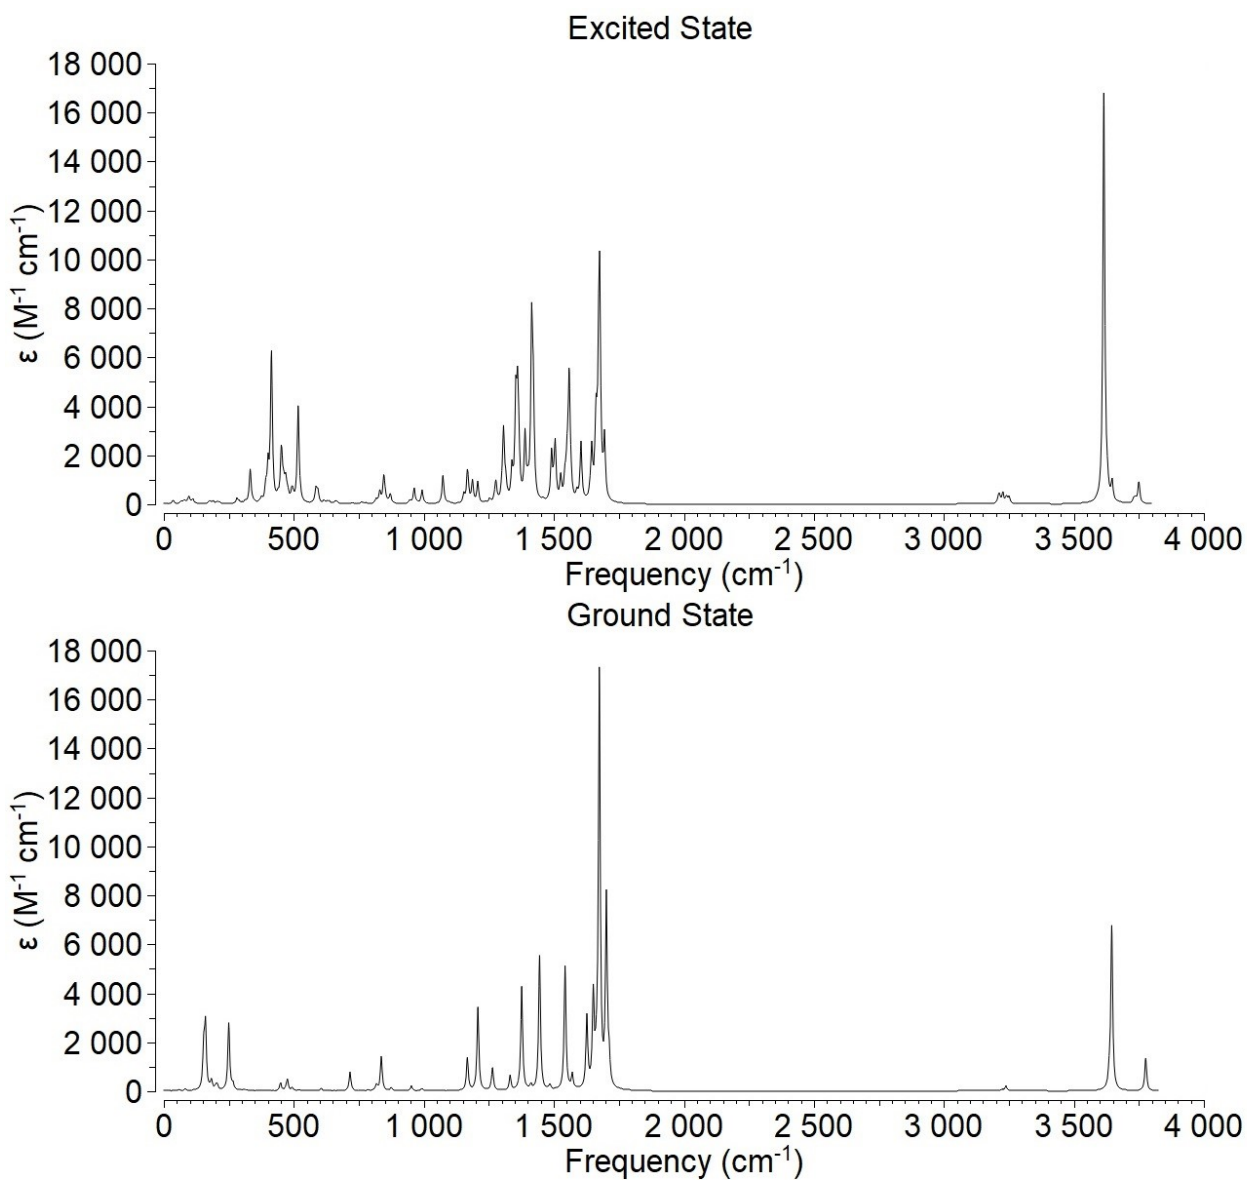

Fig. S104. Calculated vibrational spectra of PF dimer (PBE0 functional with GD3+BJ correction)

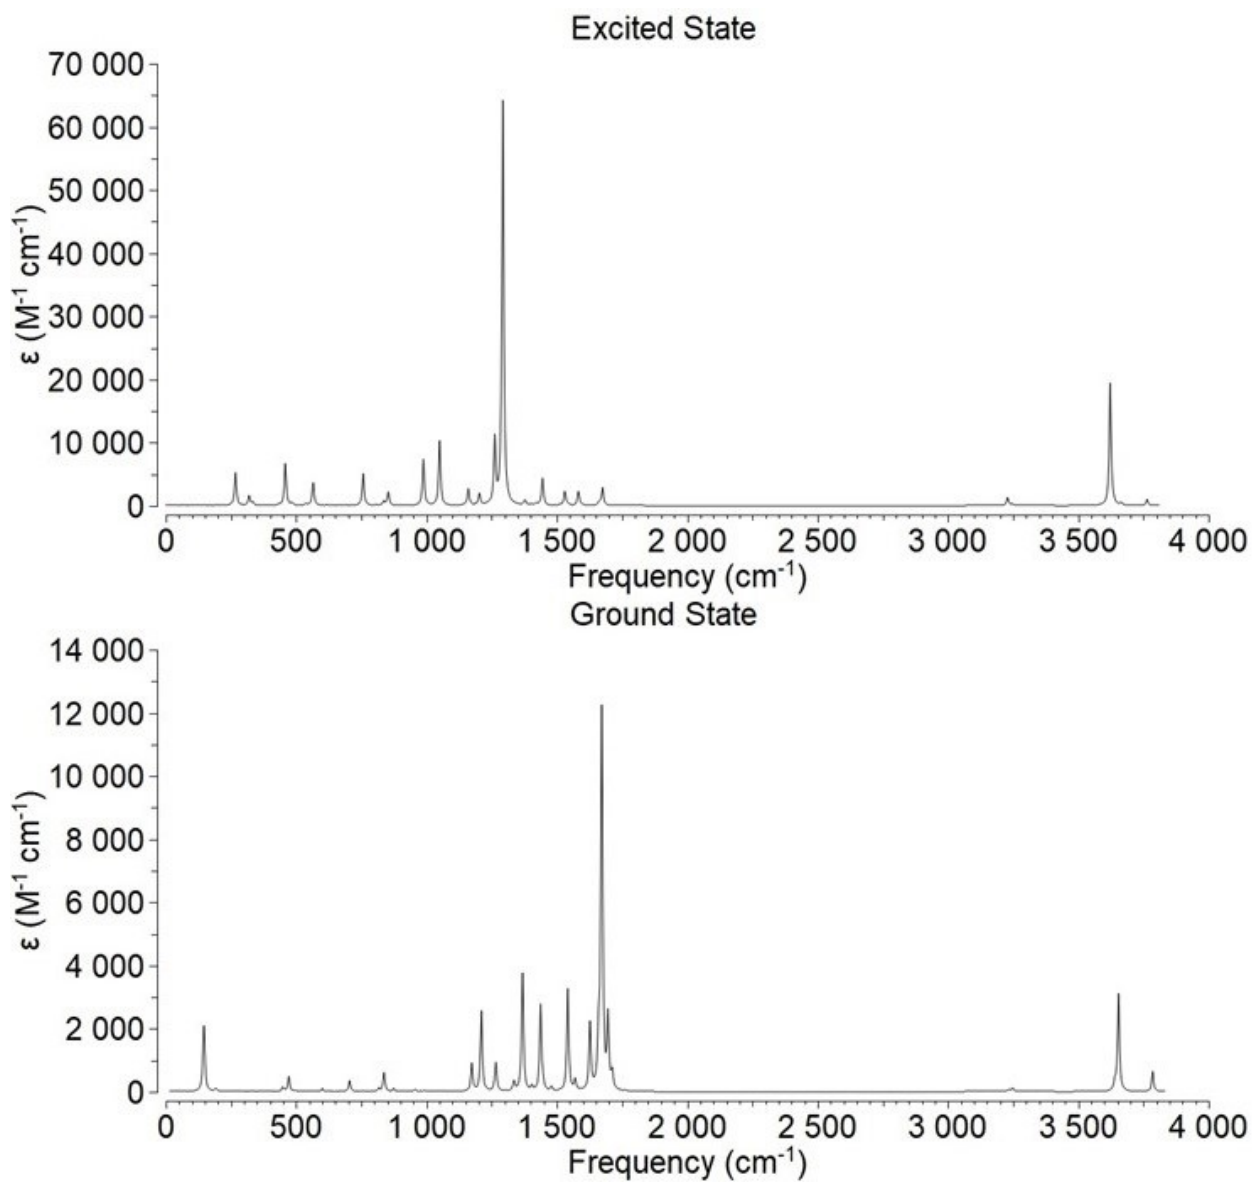

Fig. S105. Calculated vibrational spectra of PF monomer (PW6B95 functional with GD3 correction)

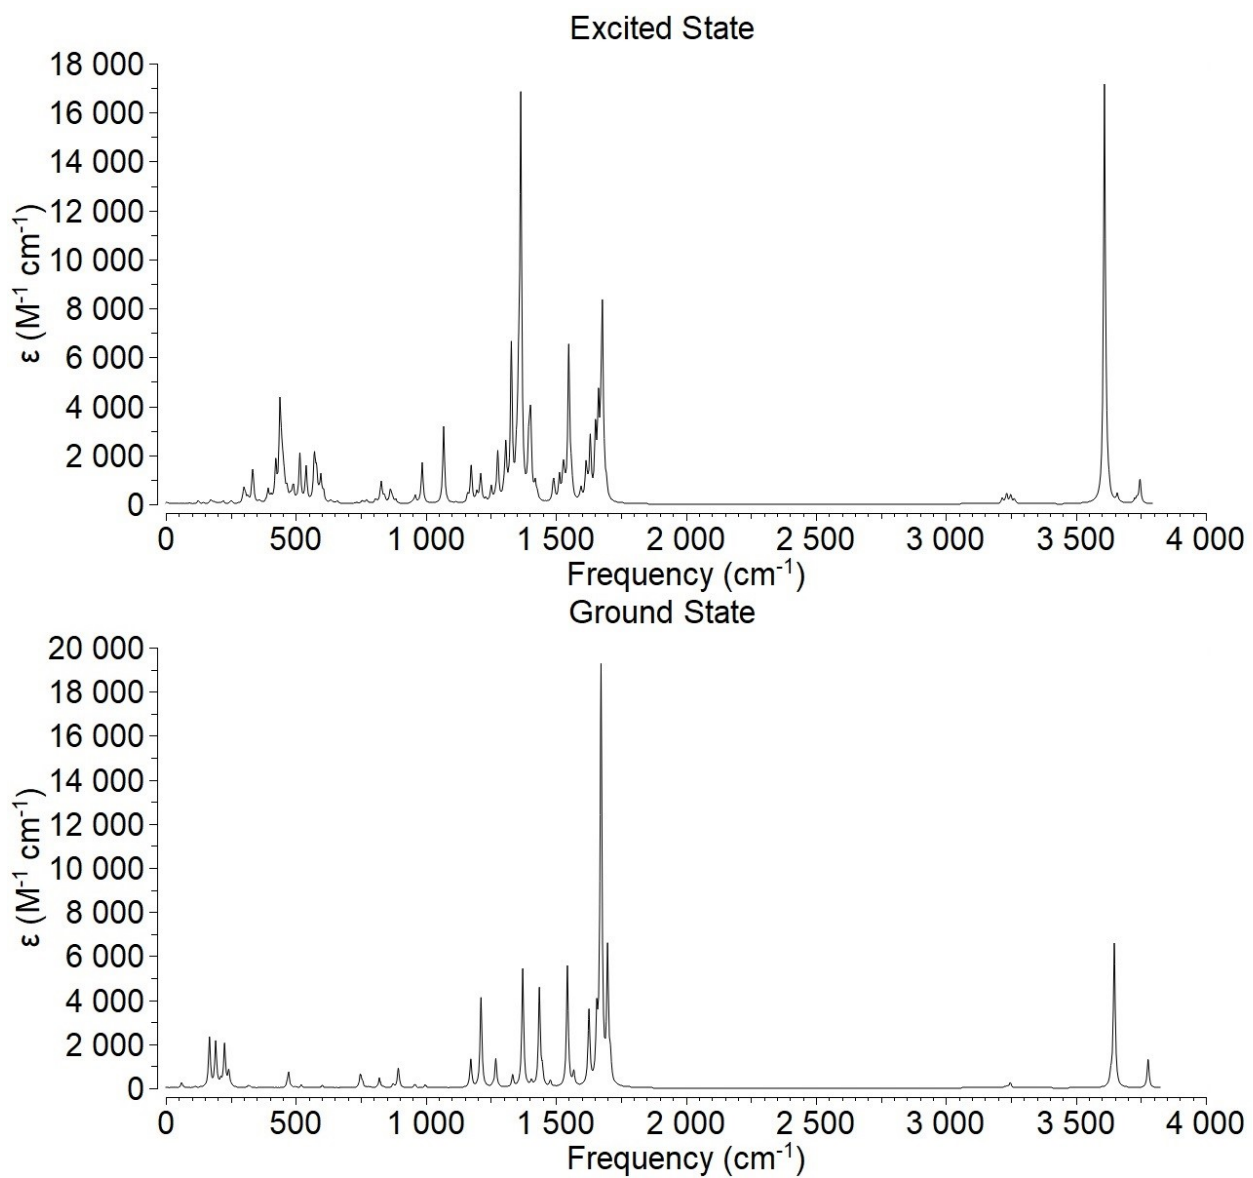

Fig. S106. Calculated vibrational spectra of PF dimer (PW6B95 functional with GD3 correction)

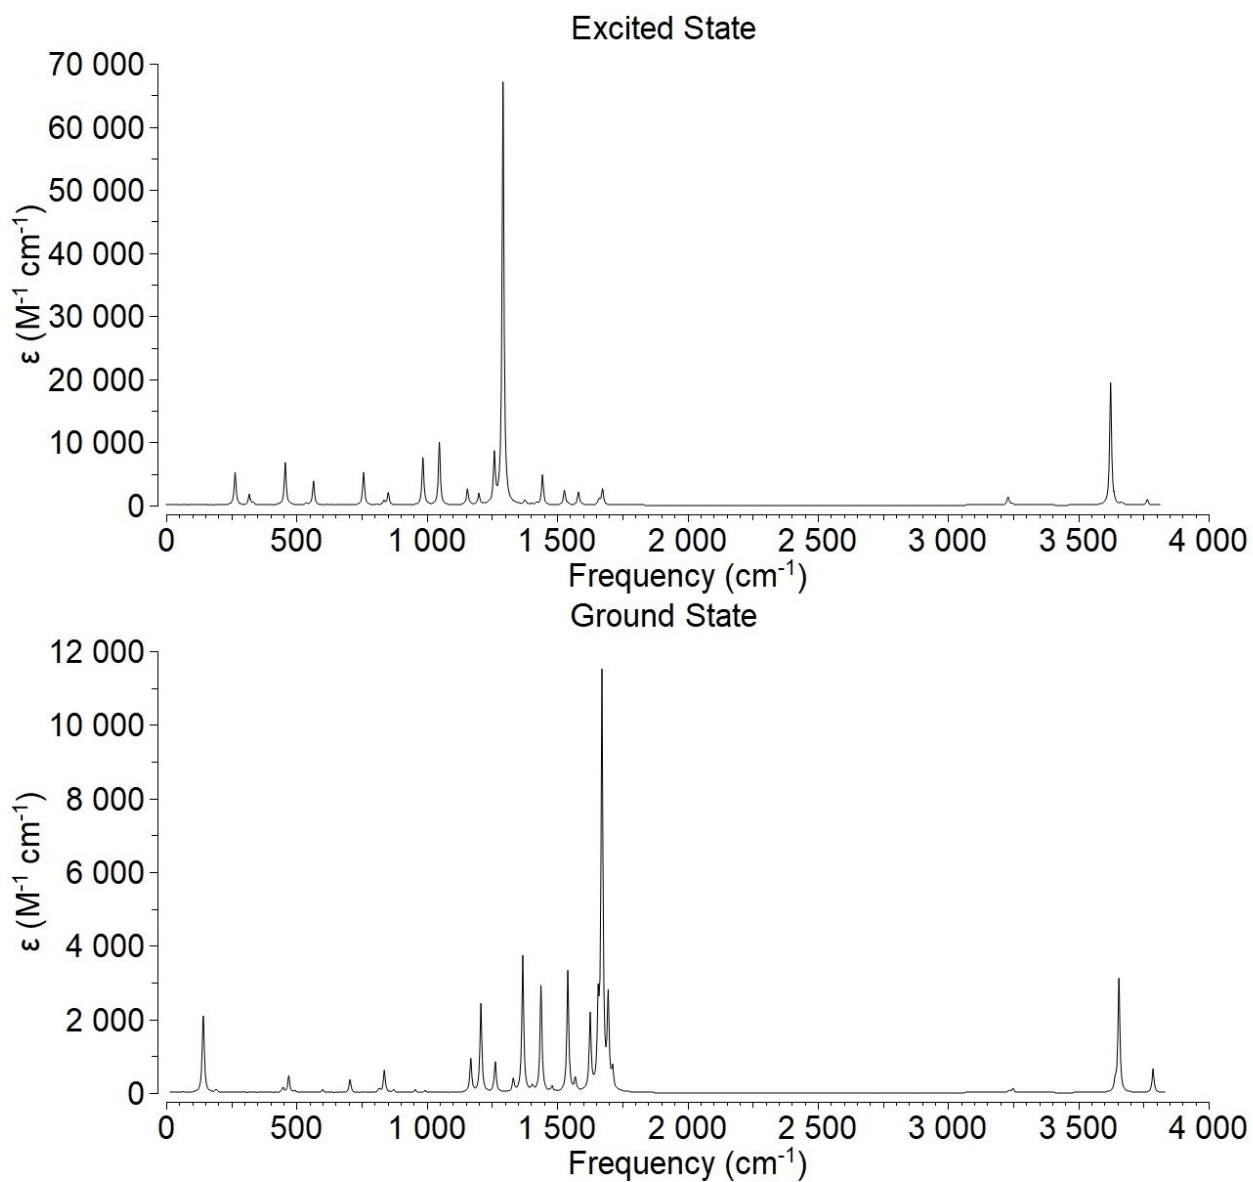

Fig. S107. Calculated vibrational spectra of PF monomer (PW6B95 functional with GD3+BJ correction)



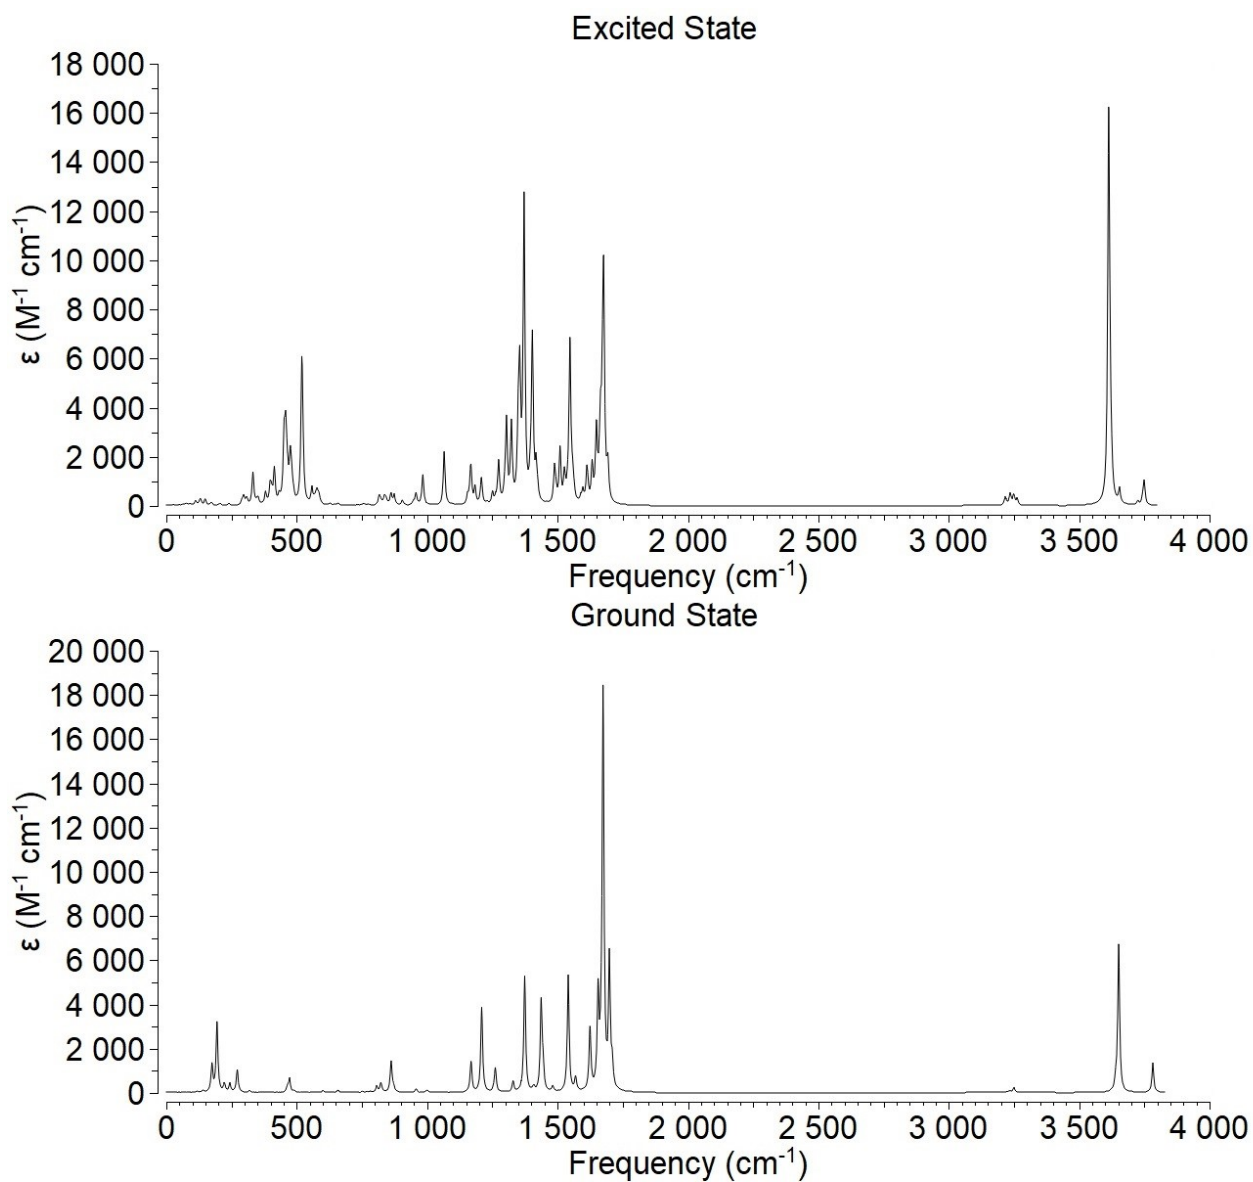

Fig. S108. Calculated vibrational spectra of PF dimer (PW6B95 functional with GD3+BJ correction)

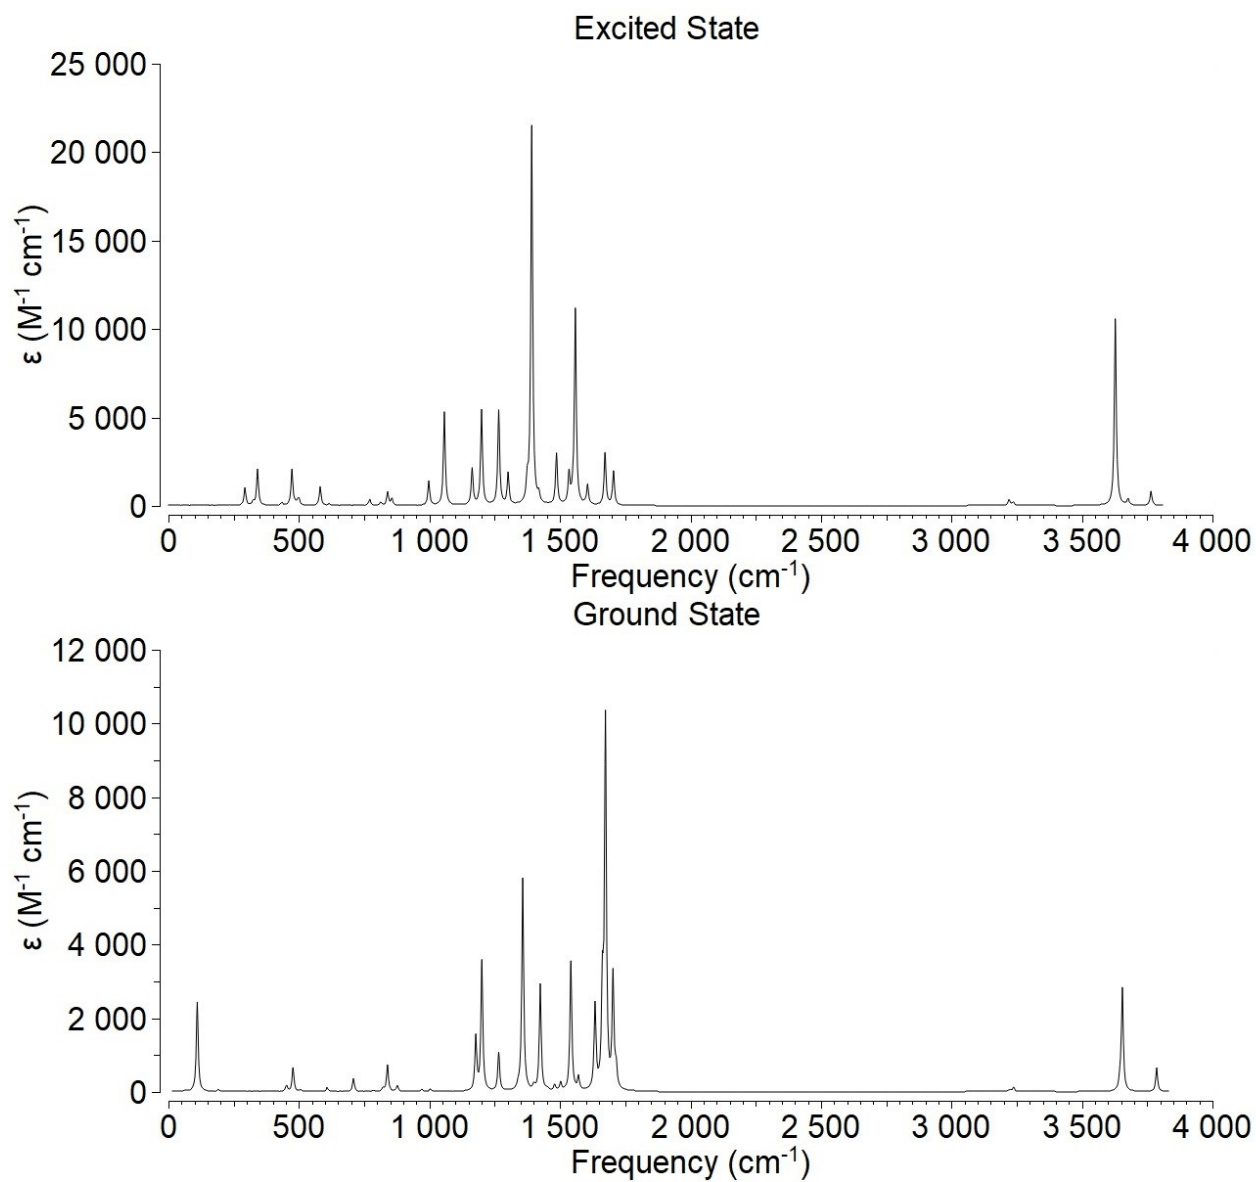

Fig. S109. Calculated vibrational spectra of PF monomer ( $\omega$ B97XD functional)

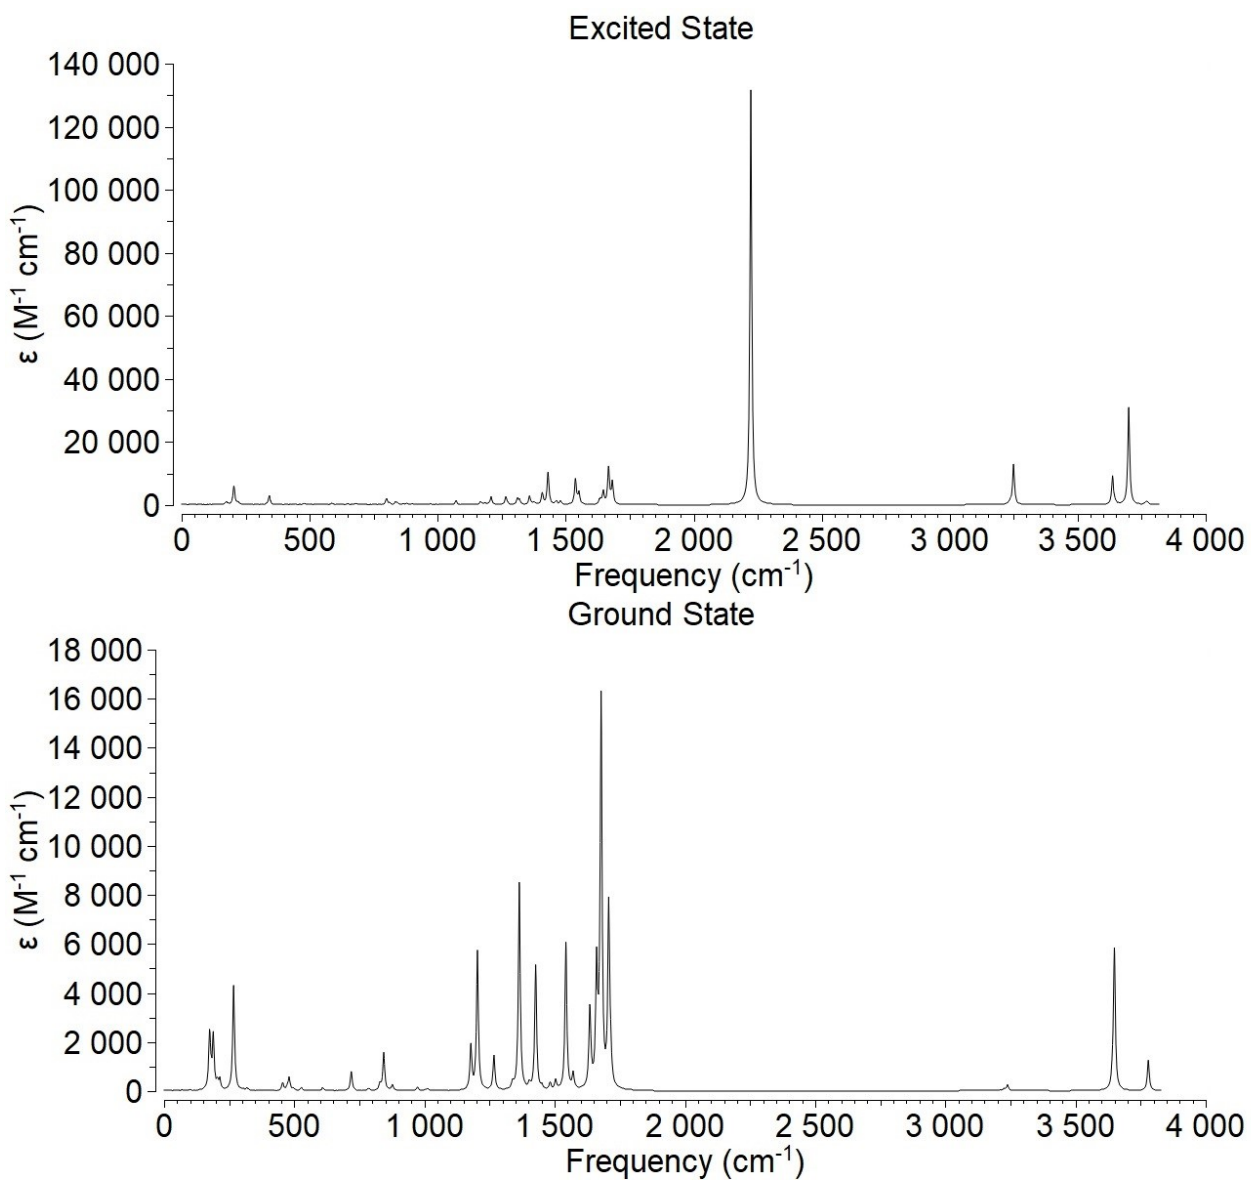

Fig. S110. Calculated vibrational spectra of PF dimer ( $\omega$ B97XD functional)

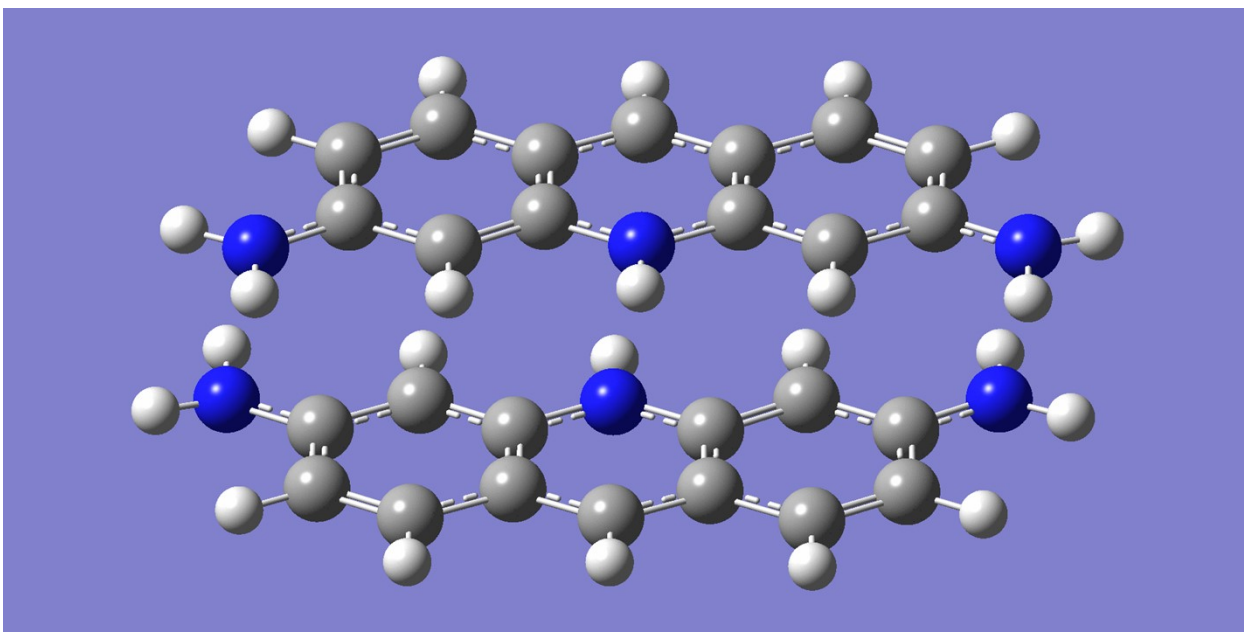

Fig. S111. GIF of vibration #138 in PF dimer (M06HF functional, S<sub>2</sub> excited state)

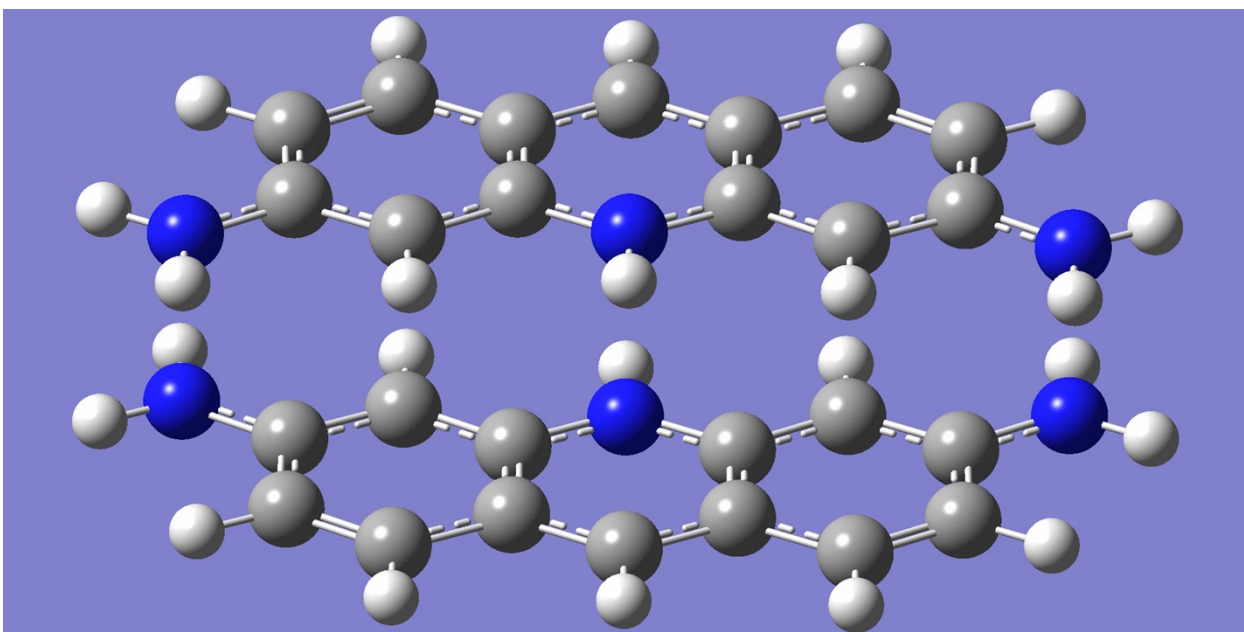

Fig. S112. GIF of vibration #138 in PF dimer (M06HF functional, ground state)

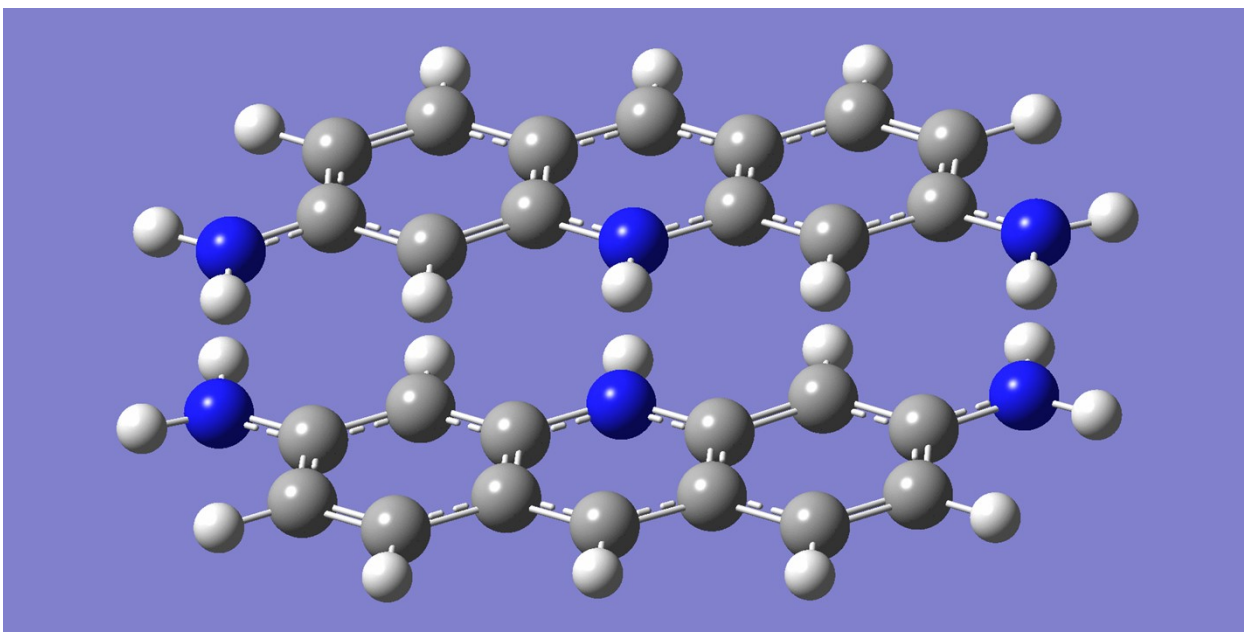

Fig. S113. GIF of vibration #162 in PF dimer (M06HF functional,  $S_2$  excited state)

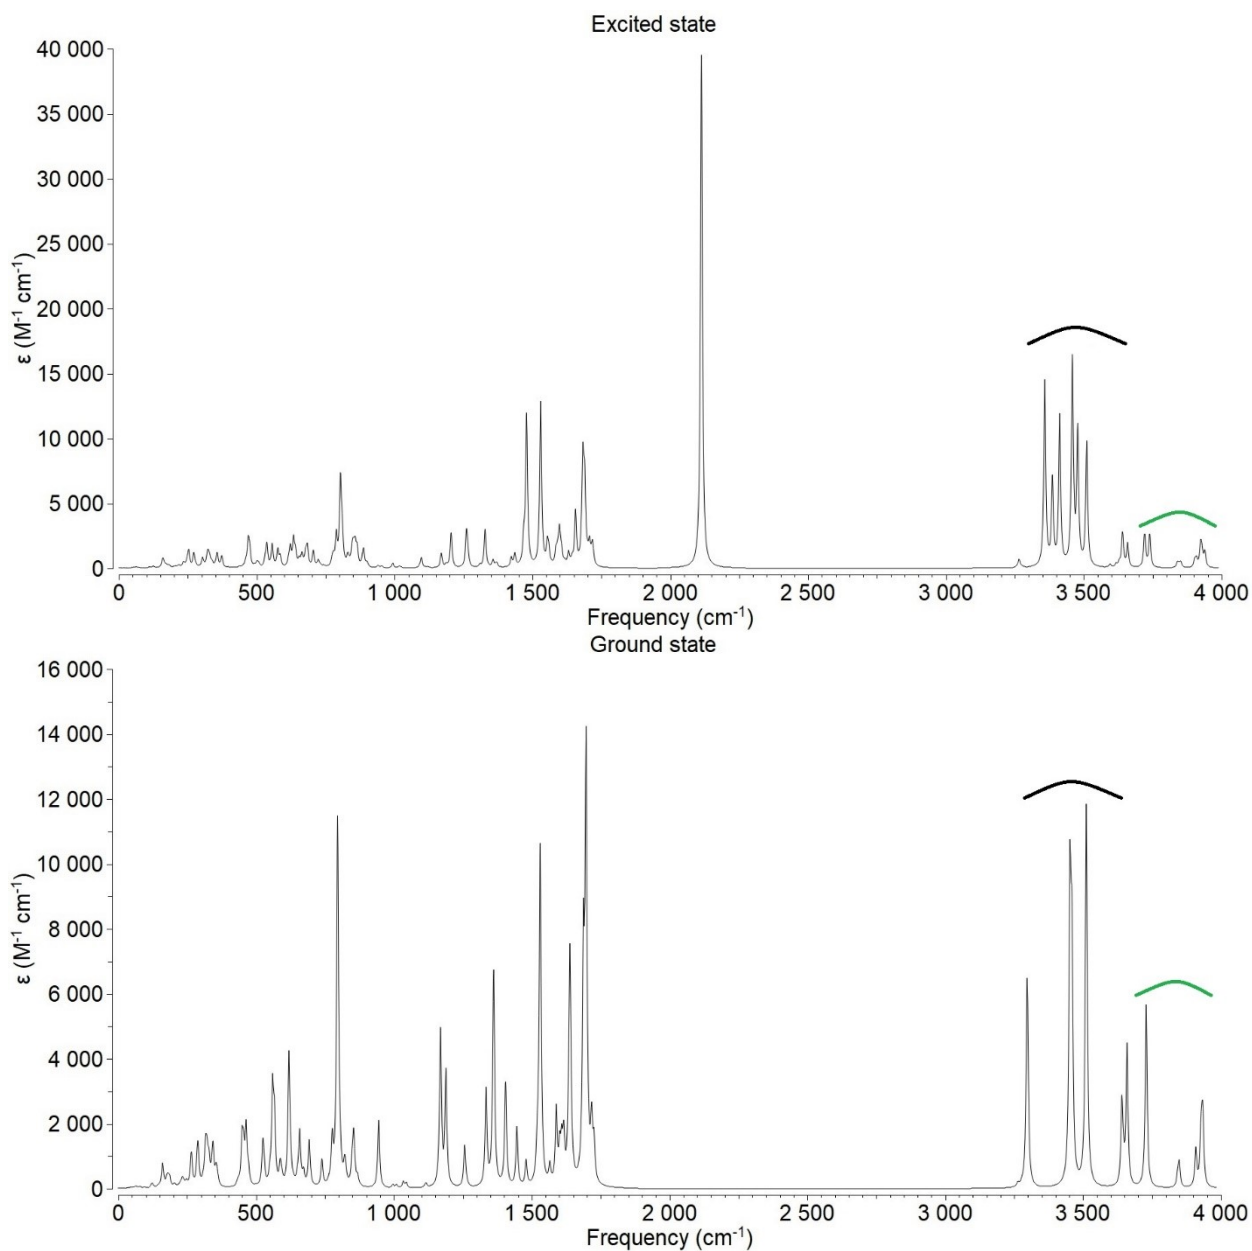

Fig. S114. Calculated vibrational spectra of “PF<sub>2</sub>+10H<sub>2</sub>O” hydrating complex (M06HF functional). The vibrations of the hydrogen atoms of the imino and amino groups of the proflavine molecules are shown in black arcs, and the vibrations of water molecules in green

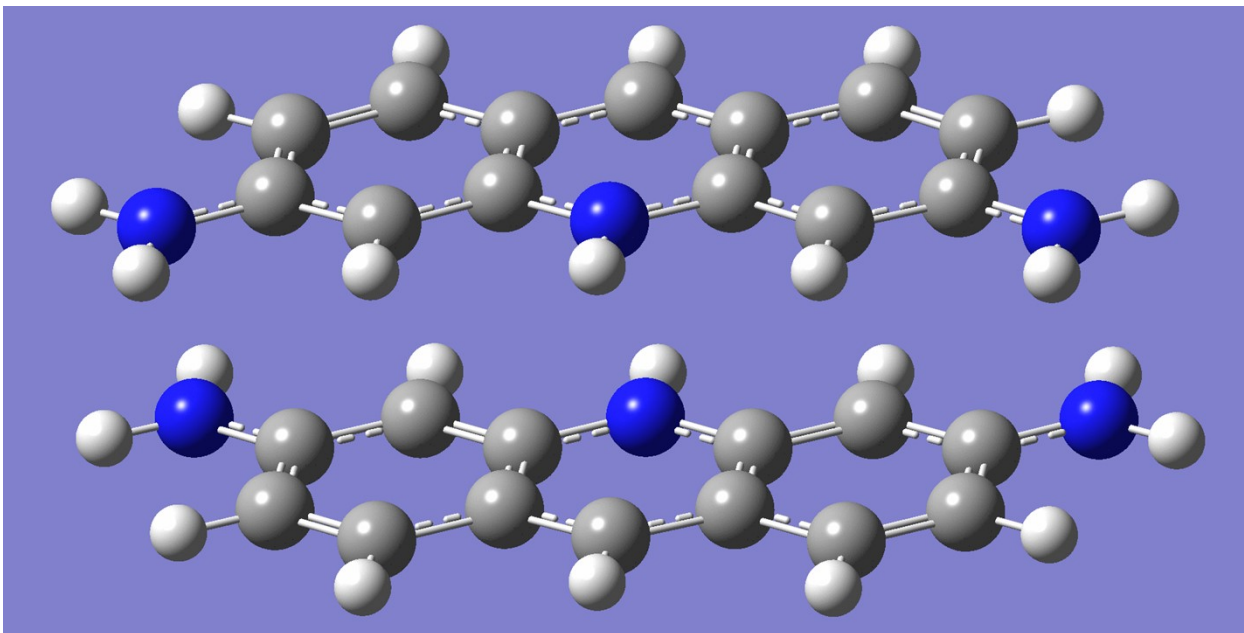

Fig. S115. GIF of vibration #111 in PF dimer (M06HF functional,  $S_1$  excited state)
